# Supplementary material
Source: ML conference proceedings conference paper supplement (https://openaccess.thecvf.com/content/CVPR2026/html/Tang_Masked_Region_Transformer_CVPR_2026_paper.html)
Supplement: Supplementary file 1 [file Tang_Masked_Region_Transformer_CVPR_2026_supplemental.pdf]

# MRT: Masked Region Transformer for Layered Image Generation and Editing at Scale

## Supplementary Material

| Training Caption Length      | FID <sub>merged</sub> ↓ |           |
|------------------------------|-------------------------|-----------|
|                              | Short Cap.              | Long Cap. |
| Short Cap.                   | 17.64                   | 18.56     |
| Long Cap.                    | 17.95                   | 16.15     |
| Mixed (50% short + 50% long) | 16.13                   | 15.93     |

Table 1. Effect of caption length during training. We train models with short captions, long captions, or a mixture of both, and evaluate FID on VC5K test set using short and long captions respectively.

| method    | Denoise steps | Latency(s) | Speed up | FID <sub>merged</sub> ↓ |
|-----------|---------------|------------|----------|-------------------------|
| Baseline  | 50            | 14.4       | -        | 16.02                   |
| + Distill | 16            | 4.5        | 3.2x     | 16.21                   |
| + Distill | 8             | 2.3        | 6.26x    | 18.58                   |

Table 2. Multi-layer generator distillation with inference time.

| #layer numbers           | 2~7    | 8~11   | 12~14  | 15~50  |
|--------------------------|--------|--------|--------|--------|
| PSNR <sub>merged</sub> ↑ | 22.51  | 21.99  | 21.36  | 20.65  |
| SSIM <sub>merged</sub> ↑ | 0.8932 | 0.8869 | 0.8780 | 0.8610 |

Table 3. Effect of layer numbers on image-to-layers (I2L) generation quality. We evaluate the model’s performance across different ranges of layer numbers in the generated results.

## 1. Additional ablation experiments

### 1.1. Mixed Training with Variable Caption Length

Table 1 demonstrates the importance of caption diversity during training. Models trained with mixed caption lengths achieve the best generalization, with FID of 16.13 on short captions and 15.93 on long captions. Training exclusively on one caption type creates a domain gap: short-caption-only training degrades to 18.56 FID on long captions, while long-caption-only training achieves 16.15 FID, showing better robustness but still suboptimal on short captions.

### 1.2. Effect of Layer Numbers on Image-to-layer

Table 3 demonstrates our method’s scalability across different layer counts for the image-to-layers task. The model handles compositions ranging from 2 to 50 layers effectively, maintaining stable performance across this wide range. This flexibility enables decomposition of both simple designs and complex multi-element compositions without architectural modifications.

### 1.3. Analysis of Distilled Models

To evaluate the real-world efficiency of our approach, we conducted inference speed benchmarks on a single NVIDIA H200 GPU. We compared the standard baseline method (operating at 50 denoising steps) against our distilled MRT model at reduced inference steps (16 and 8 steps). As shown in Table 2, the baseline model requires 14.4 seconds to com-

plete the generation process. In contrast, applying DMD2 distillation significantly accelerates inference. Specifically, our model achieves a  $3.2\times$  speed-up (4.5s) at 16 steps with negligible degradation in generation quality (FID increases only slightly from 16.02 to 16.21). Furthermore, reducing the inference budget to just 8 steps yields a massive  $6.26\times$  speed-up (2.3s), showing that our method successfully balances high-fidelity generation with interactive-level latency. We also present the generated samples and compare the original and distilled models in Fig. 1.

## 2. Attention Analysis of Image-to-Layer Model

To validate that our model learns meaningful semantic representations rather than merely memorizing layout priors, we visualize the pixel-wise attention maps generated during the decomposition process. Fig. 3 illustrates the correspondence between the generated transparent layers and their associated attention activations. As observed, the attention mechanism exhibits strong spatial localization capabilities. For each predicted layer, the attention weights (visualized as heatmaps) highly correlate with the semantic boundaries of the target elements. For instance, when reconstructing high-frequency components such as text (*e.g.*, “Bundle of Joy” in the second case, “Love NEVER FELT...” in the third one) or fine-grained graphical elements, the attention is tightly focused on the relevant character strokes and shapes, effectively suppressing background noise. Conversely, for background patterns or larger geometric shapes, the attention acts more broadly to capture the texture and spatial extent of the region. This visualization confirms that the model successfully disentangles the composite image by attending to distinct visual features guided by the layout, ensuring that the resulting RGBA layers possess clean alpha mattes and coherent textures.

## 3. Efficiency Analysis of Image-to-Layer Model

**Latency.** As shown in Fig. 2, due to our regional diffusion transformer architecture, we achieve significant speedup and over  $100\times$  acceleration compared to Qwen-Image-Layered, which uses the same number of full-resolution tokens to model each transparent layer regardless of the actual area of contents. We achieve similar latency speed-up as the statistics shown in ART [38] and we further applied various advanced cache techniques, model distillation, lower-precision, parallel inference to optimize the latency of our

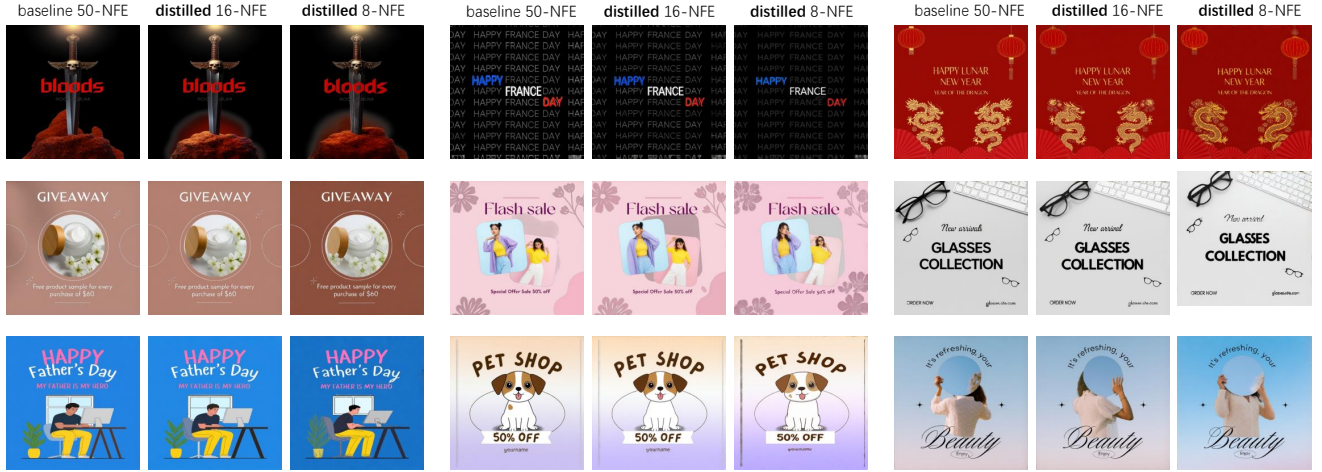

Figure 1. Generation quality of distilled models. We achieve up to 6x speed up without sacrificing the quality and fidelity of images.

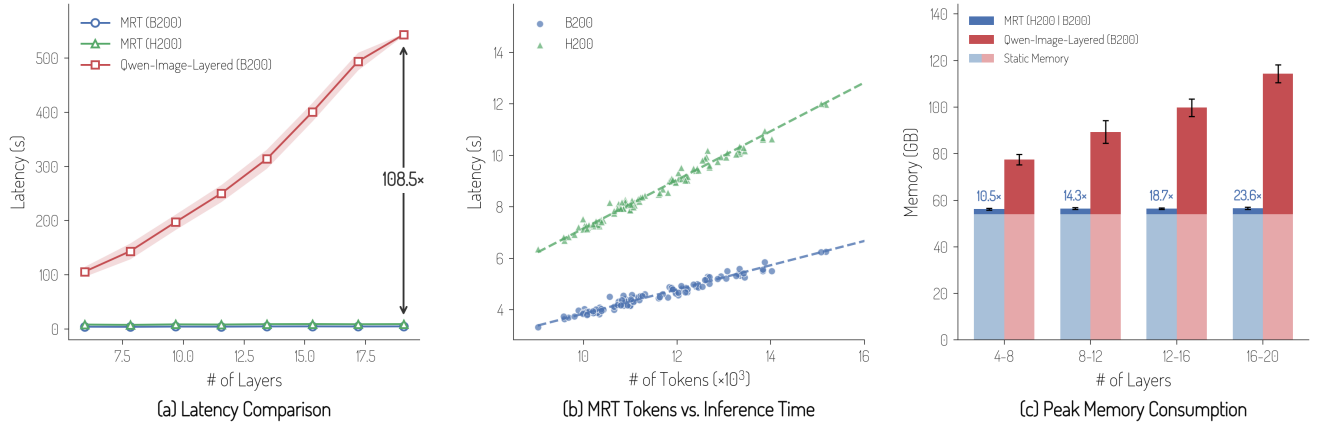

Figure 2. **Inference efficiency comparison between MRT and Qwen-Image-Layered.** (a) Latency scaling with number of layers. MRT maintains near-constant latency ( $\sim 5$ s) while Qwen-Image-Layered scales linearly, resulting in up to  $108.5\times$  speedup at  $\sim 20$  layers. (b) MRT inference time vs. token count on H200 and B200 GPUs, demonstrating linear scaling behavior. (c) Peak GPU memory consumption across varying layer configurations. The shaded region indicates the baseline memory allocated to model weights. MRT reduces memory consumption by  $10.5\times \rightarrow 23.6\times$ , with efficiency gains scaling proportionally with layer numbers. All reported results are conducted over 100 samples on single GPU with identical layer numbers.

model to within  $\sim 3$  seconds when running with  $4\times$  H100 GPUs and  $\sim 5$  seconds on a single H100 GPU when required to decompose a single 1K high-resolution image into nearly 20 transparent layers.

**Memory.** Unlike Qwen-Image-Layered, which requires significantly more visual tokens to extract more layers from a flat image, our approach is far more memory efficient, requiring far fewer tokens to decompose an image into many transparent layers as shown in Fig. 2. Our method achieves clear advantage in memory usage, which is further strengthened as the number of layer grows.

## 4. User study details

### 4.1. User Study on Text-to-Layer Task

To evaluate the generation quality of our models on the text-to-layer task, we conducted a user study com-

paring our method (MRT) with the baseline (ART). We employed a blind, pairwise comparison setup. For each sample, participants were first shown the input text prompt, followed by the corresponding results generated by MRT and ART displayed side-by-side. To eliminate positional bias, the display order (left or right) of these two results was randomized for each evaluation. Participants were asked to cast a three-way forced-choice vote—"Method A is better," "Method B is better," or "Tie"—across four distinct dimensions: (1) elements (layout), (2) visual appeal (aesthetics), (3) correctness of the text (typography), and (4) coherence and quality of each layer (harmonization).

The web-based evaluation interface is shown in Fig. 39, where two generated results are displayed side-by-side with the text caption provided on the right panel.

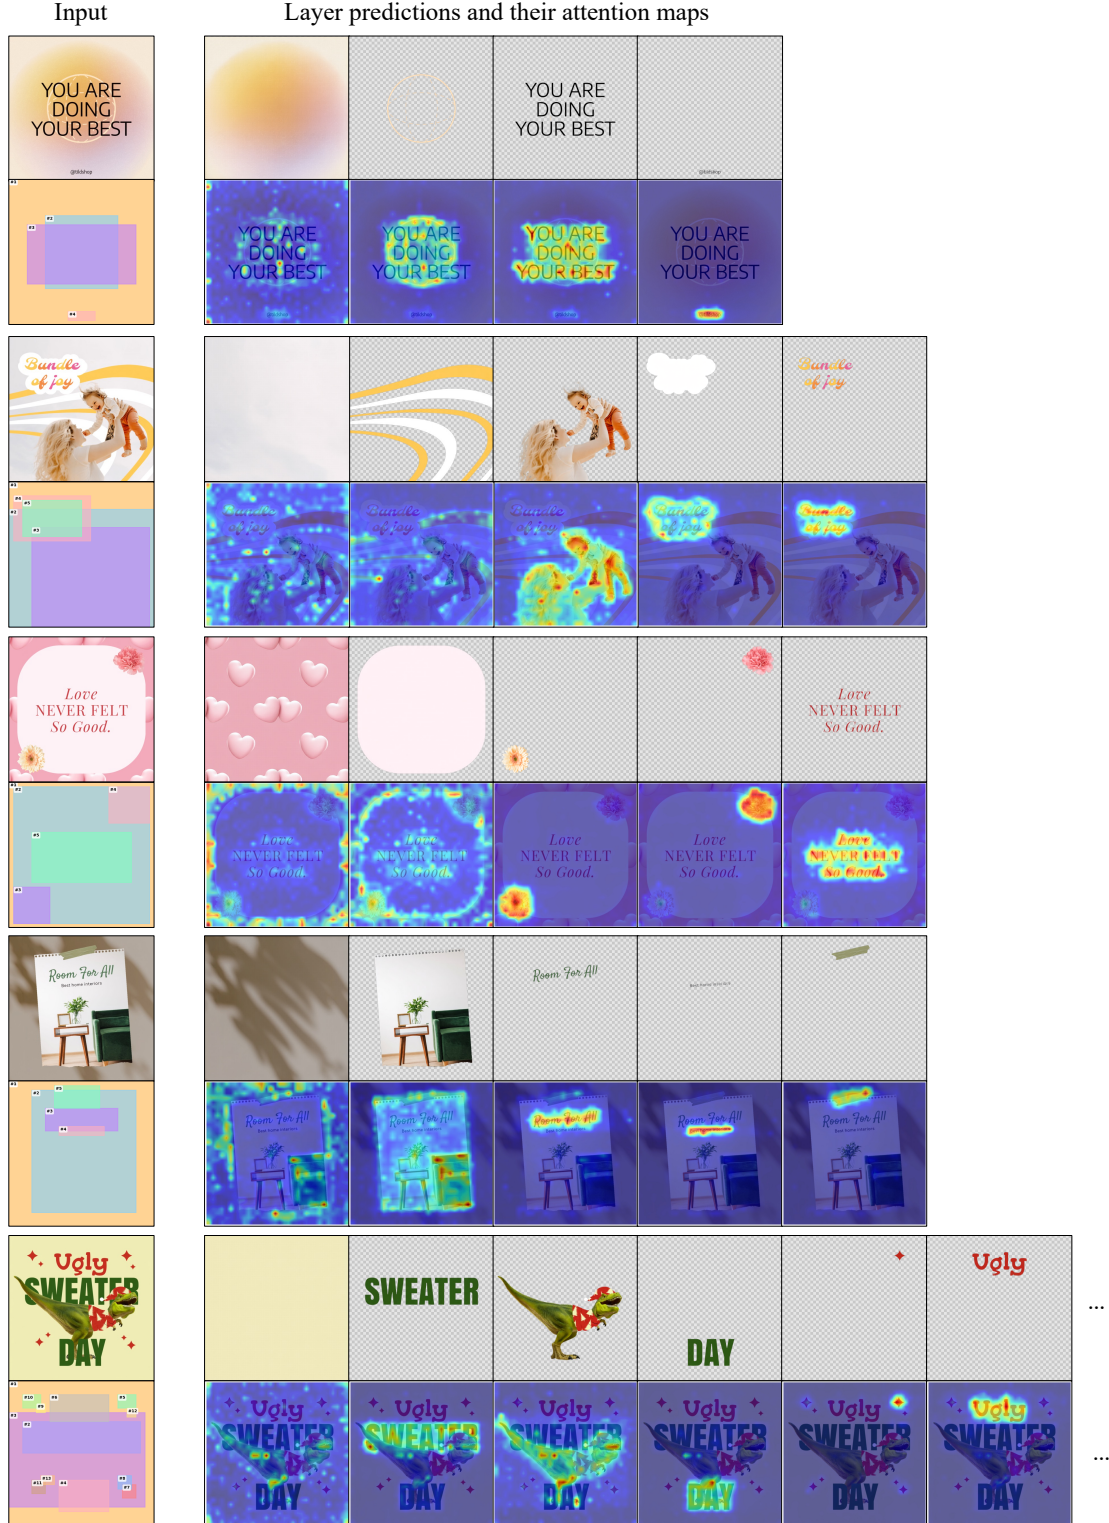

Figure 3. **Attention map visualizations of image-to-layers task.** We demonstrate the interpretability of our model by visualizing the internal attention weights during the layer generation process. Left: The input composite image and its corresponding layout. Right: The decomposition results. The top row displays the predicted transparent layers, while the bottom row shows the corresponding attention maps overlaid on the input image. Red regions indicate high activation values. The results highlight that the model’s attention is semantically selective, accurately aligning with specific visual elements (e.g., text, foreground objects, background patterns) to generate high-quality, disentangled layers.

## 4.2. User Study on Image-to-Layer Task

For the `image-to-layers` task, we conducted a comprehensive user study by performing three separate pairwise comparisons between our method and three state-of-the-art baselines: (1) Ours vs. LayerD, (2) Ours vs. Lovart, and (3) Ours vs. Roboneo. Each comparison was run as an independent blind test. Participants in each study were presented with a three-image layout: the original input image was displayed as a central reference, while our method’s result and the corresponding baseline’s result were shown side-by-side. To eliminate positional bias, the display order (left or right) of our result and the baseline’s result was fully randomized in every trial. Participants were asked to make a three-way forced-choice vote (“Method A is better,” “Method B is better,” or “Tie”) based on three key metrics: (1) granularity, (2) layer integrity, and (3) layer quality.

The evaluation interface is illustrated in Fig. 40, where the reference input image is shown at the center with decomposition results from two methods displayed on both sides.

## 5. Limitations

Although our model demonstrates strong performance in the image-to-layer task, it faces challenges when applied to real-world photographs. Specifically, our method often fails to correctly handle shadows, resulting in segmented object layers that exclude shadow regions and leaving the shadows on the background layer, which leads to visual inconsistency. We attribute this limitation primarily to our training data: our model was trained exclusively on design datasets, which are planar and lack physical effects such as shadows, reflections, and refractions that commonly appear in natural scenes. Despite this domain gap, we were pleasantly surprised to find that our method can still generalize reasonably well to real images, even without any supervision on real-world multi-layer data. As shown in our illustrations, most objects are successfully separated, which we believe stems from the strong visual understanding capability inherited from the Qwen-Image backbone, demonstrating the robustness, adaptability, and scalability of our approach. In future work, we plan to extend our method to real-world image scenarios by collecting and training on datasets that include realistic visual effects such as shadows and reflections. We believe such extensions will further enhance the model’s ability to produce coherent and physically plausible layer decompositions.

## 6. Visualizations and Qualitative Analysis

### 6.1. Diverse Text-to-Layer Generation

We visualize the qualitative results of our Text-to-Layer task in Fig. 4 through Fig. 12. Our Masked Region Transformer

demonstrates exceptional versatility in generating high-fidelity multi-layer designs solely from textual descriptions. As shown in Fig. 4 through Fig. 10, the model successfully synthesizes coherent compositions ranging from simple layouts to complex designs with over 25 layers and even more, maintaining strict spatial consistency and stylistic harmony. A key advantage of our approach is the native support for diverse typography; Fig. 11 illustrates our unique overflow generation capability. Unlike prior methods that truncate content at the canvas edge, our model generates complete, full-size RGBA layers that extend beyond the visible background boundary, thereby preserving full editability and reusability for downstream compositional tasks. Furthermore, Fig. 12 highlights the model’s capability to render accurate visual text across multiple languages, including Chinese, ensuring practical utility for global design applications.

### 6.2. Comparative Analysis of Image-to-Layer

In Fig. 13 through Fig. 20, we provide a comprehensive qualitative comparison between our approach and state-of-the-art baselines, including LayerD, Lovart, and RoboNeo. The results consistently demonstrate that our method establishes a new standard for layer decomposition quality. While commercial systems like RoboNeo often introduce visual artifacts or fail to produce clean transparency, and academic baselines like LayerD tend to produce overly grouped layers that limit editing flexibility, our Masked Region Transformer achieves a superior balance. Our method excels in generating precise alpha mattes, maintaining semantic integrity, and achieving appropriate decomposition granularity (e.g., separating distinct visual elements rather than merging them). This is particularly evident in complex overlapping regions, where our model successfully disentangles elements that other methods fail to separate.

### 6.3. Scalability on Layer Counts in Image-to-Layer

To evaluate the robustness of our framework, we visualize image-to-layers decomposition results across varying degrees of complexity in Fig. 21 through Fig. 25, ranging from 6 layers up to 16 layers. These visualizations confirm that our architecture scales effectively without performance degradation. The model maintains consistent quality in boundary detection and content preservation in cases of a wide range of layer counts. This stability across diverse layer counts validates the efficacy of our masked attention mechanism, proving that the model can handle the structural complexity of professional-grade graphic designs.

### 6.4. Generalization to AI-generated Images in Image-to-Layer

To validate whether our model can generalize to AI-generated images, we visualize more image-to-layers de-

composition and compare with Qwen-Image-Layered in Fig. 26 through Fig. 29. As shown, our method produces more coherent and well-separated layers, with clearer foreground-background disentanglement and sharper transparency boundaries. In contrast, Qwen-Image-Layered tends to mix unrelated contents into the same layer or repeat one object across multiple layers. This indicates that our model is more robust to the distribution shift of AI-generated data. Overall, the results demonstrate strong generalization ability and reliable layer decomposition on both design style and natural images.

### 6.5. Context-Aware Layer Addition

Fig. 30 demonstrates the capabilities of our layers-to-layers task, specifically focusing on layer addition. Here, we simulate a user editing workflow where new elements—such as text or decorative objects—are inserted into an existing design based on text prompts and specified bounding boxes. The results show that our model does not merely paste isolated objects; instead, it generates new layers that are contextually aware, matching the lighting, perspective, and artistic style of the existing layers. By conditioning on the full composition, the added layers harmonize seamlessly with the original design, preserving the global aesthetic while fulfilling the user’s semantic requirements.

### 6.6. Layer Restylization and Harmonization

In Fig. 31, we showcase the layer restylization capability, where user-provided assets are transformed to align with a target design’s visual identity. Our model effectively transfers style while preserving the geometric structure of the input asset. The visualization demonstrates that our single-pass generation approach ensures cross-layer consistency, successfully adapting the color palette, texture, and artistic rendering of external assets to match the pre-existing composition. This capability is essential for unifying disparate elements into a cohesive graphic design.

### 6.7. Layout Generalization in Text-to-Layer

Fig. 32 and Fig. 33 present an analysis of the interplay between text prompts and spatial controls. In these experiments, the text prompt contains implicit or explicit descriptions of element positions, while we simultaneously provide varying spatial layouts (bounding boxes) that may conflict with these textual descriptions. Remarkably, the results demonstrate that our model exhibits strong adherence to the user-provided layout, effectively overriding the spatial biases present in the text prompt while retaining the semantic content. This confirms that our framework successfully disentangles semantic generation from spatial arrangement, allowing users to enforce arbitrary layouts—such as moving a title from the top to the bottom—without compromising

the generated content’s quality or the prompt’s semantic fidelity.

### 6.8. Layout-Guided Image Decomposition

For the Image-to-Layer task, Fig. 34 through Fig. 36 visualize the input raster images alongside their corresponding layout structures (bounding boxes and Z-order) used during inference. These examples illustrate how the model utilizes layout information—whether derived from automatic detectors or manual annotation—as a structural prior to guide the decomposition process. The visualizations show that the model accurately resolves ambiguities in the raster image by leveraging the provided spatial cues, resulting in semantically meaningful layers that strictly conform to the specified boundaries. This highlights the model’s ability to produce controllable and predictable decompositions essential for professional editing workflows.

### 6.9. Generalization to Natural Scenes

Although our model is trained exclusively on graphic design datasets (posters, flyers, etc.), Fig. 37 demonstrates its zero-shot generalization capability to real-world natural images. The model successfully segments objects from photographs into transparent layers, leveraging the strong visual understanding inherited from the Qwen-Image backbone. However, we observe a specific limitation due to the domain gap: unlike flat graphic designs, real-world scenes contain complex physical lighting effects. Consequently, the model often fails to associate cast shadows with their respective objects, leaving shadows on the background layer rather than the object layer. Despite this limitation regarding physical lighting effects, the structural decomposition remains surprisingly robust for out-of-domain data.

### 6.10. Failure Cases

Finally, we analyze representative failure cases in Fig. 38 to provide a balanced view of our method’s current limitations. We observe a common issue across all four tasks: some transparent backgrounds are decoded into gray instead of remaining transparent. This ambiguity arises because our VAE encoder currently uses a 3-channel input, which compresses transparent layers into a gray representation that the decoder sometimes misinterprets. Future work could address this by adopting a 4-channel encoder or alternative encoding schemes. Additionally, we identify task-specific limitations: 1) for text generation, the model sometimes struggles with rendering very small glyphs accurately; and 2) for layer-to-layer tasks, we occasionally observe failures in identity preservation (IP) and instruction following, particularly when complex style transfer or precise object insertion is required. These cases outline critical directions for future research in multi-layer generative modeling.

| Prompt                                                                                                                                                                                                                                                                                                                                                                                                                                                                                                                                                                                                                                                                                                                                                                                                                                                                                                                                                                                                                                                                                                                                                                                                                                                                                                                                                                                                                                                                                                                                                                                                                                                                                                                                                                                                                                                                                                                                                                                                                                                                                                                                                                                                                          | Layout                                                                              | Generated                                                                            | Layer Images                                                                          |
|---------------------------------------------------------------------------------------------------------------------------------------------------------------------------------------------------------------------------------------------------------------------------------------------------------------------------------------------------------------------------------------------------------------------------------------------------------------------------------------------------------------------------------------------------------------------------------------------------------------------------------------------------------------------------------------------------------------------------------------------------------------------------------------------------------------------------------------------------------------------------------------------------------------------------------------------------------------------------------------------------------------------------------------------------------------------------------------------------------------------------------------------------------------------------------------------------------------------------------------------------------------------------------------------------------------------------------------------------------------------------------------------------------------------------------------------------------------------------------------------------------------------------------------------------------------------------------------------------------------------------------------------------------------------------------------------------------------------------------------------------------------------------------------------------------------------------------------------------------------------------------------------------------------------------------------------------------------------------------------------------------------------------------------------------------------------------------------------------------------------------------------------------------------------------------------------------------------------------------|-------------------------------------------------------------------------------------|--------------------------------------------------------------------------------------|---------------------------------------------------------------------------------------|
| <p>The image presents a cheerful and vibrant composition that celebrates the arrival of spring. The background is a soft, pastel pink, creating a warm and inviting atmosphere that evokes feelings of renewal and joy. This gentle hue serves as a perfect canvas for the other elements, enhancing their visual appeal. At the center of the image, the phrase "Hello Spring" is prominently displayed in a playful and stylish font. The word "Hello" is rendered in a bold, dark pink color, while "Spring" is written in a flowing, cursive script that adds a touch of elegance. The text is enclosed within a whimsical, cloud-like shape that features decorative elements such as small droplets and a flower motif, further emphasizing the theme of springtime. Along the bottom of the image, a row of fresh pink tulips adds a natural and lively touch. The tulips are in various stages of bloom, showcasing their delicate petals that range from soft pink to a slightly deeper shade. Their green leaves provide a vibrant contrast against the pink background, grounding the composition and adding a sense of freshness. The tulips are arranged in a way that draws the viewer's eye across the image, creating a harmonious balance between the text and floral elements. The overall artistic style of the image is modern and graphic, with clean lines and a minimalist approach that enhances its appeal. The use of soft edges and a cohesive color palette contributes to a light and airy feel, making the image feel uplifting and optimistic. The theme of the image is clearly celebratory, capturing the essence of spring as a time of growth and renewal. The mood conveyed is one of happiness and positivity, making it an ideal visual for various contexts. This image could be effectively used for social media posts, greeting cards, or promotional materials for spring events, floral shops, or seasonal sales. Its engaging design and cheerful message make it a versatile choice for anyone looking to embrace the spirit of spring.</p>                                                                                                                                       | 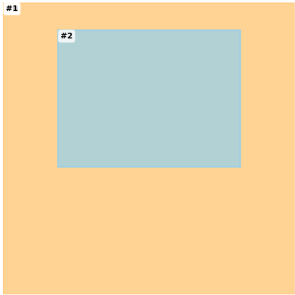   | 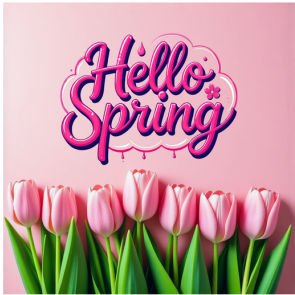   | 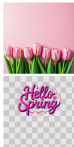   |
| <p>The image presents a whimsical and playful background that features a variety of celestial motifs, including planets, stars, and swirling designs, all rendered in a soft lavender hue. The background is predominantly white, which enhances the lightness and brightness of the overall composition, allowing the purple illustrations to stand out vividly. The celestial elements are scattered across the surface, creating a sense of movement and exploration, reminiscent of a child's imagination. At the center of the image lies a young girl dressed in a delicate, peach-colored dress that features a bow at the waist. The dress has a soft, tulie-like texture that adds a sense of whimsy and elegance. She is positioned in a relaxed pose, with her arms raised and her hair styled in playful pigtails, contributing to the joyful and carefree atmosphere of the scene. The girl's shoes are light pink, complementing the color of her dress and enhancing the overall pastel color scheme. Prominently displayed at the bottom of the image is a banner with the text "You're a Star!" The text is presented in a bold, playful font that is easy to read and adds to the cheerful tone of the image. The banner has a soft, brushstroke effect in a light beige color, which contrasts nicely with the white background and ties in with the peach tones of the dress. The artistic style of the image is modern and playful, with a digital illustration quality that appeals to both children and adults. The use of soft edges and light colors creates a dreamy, imaginative feel, making it suitable for a variety of contexts, such as children's birthday invitations, motivational posters, or social media posts celebrating individuality and creativity. Overall, the theme of the image is uplifting and celebratory, conveying a message of encouragement and positivity. The combination of celestial imagery and the phrase "You're a Star!" suggests a focus on self-worth and the idea that everyone has their own unique brilliance to shine.</p>                                                                                                                                  | 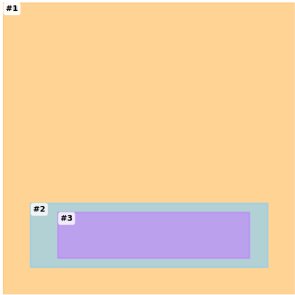   | 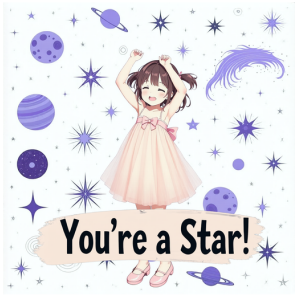   | 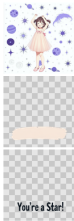   |
| <p>The image features a vibrant and playful background in a deep blue hue, which serves as a striking canvas for the central elements. This rich color creates a sense of warmth and coziness, perfectly complementing the theme of comfort during cold weather. At the center of the composition is a character depicted in a whimsical, cartoonish style. The character is wrapped in a large, bright red blanket adorned with abstract, leaf-like patterns, which adds a touch of visual interest and texture. The blanket's bold color contrasts beautifully with the blue background, enhancing the overall warmth of the image. The character is holding a steaming cup of tea, with a stylized design that suggests warmth and comfort. Surrounding the character are playful, handwritten text elements that read, "A very hot tea for a cold winter." The text is in a white, flowing font that adds a lighthearted and inviting feel to the image. The placement of the text, curving around the character, creates a sense of movement and draws the viewer's eye toward the central theme of warmth and relaxation. The artistic style of the image is modern and illustrative, characterized by bold colors and simplified forms. The use of flat design techniques, with minimal shading and soft edges, contributes to a cheerful and approachable aesthetic. The overall theme of the image is cozy and inviting, evoking feelings of comfort and warmth during the winter months. The mood conveyed is one of relaxation and enjoyment, making it an ideal representation of the simple pleasures of sipping hot tea on a chilly day. This image could be effectively used in various contexts, such as social media posts promoting winter beverages, greeting cards for the holiday season, or as part of a marketing campaign for tea brands. Its cheerful and engaging design makes it suitable for any platform aiming to evoke warmth and comfort.</p>                                                                                                                                                                                                                                                   | 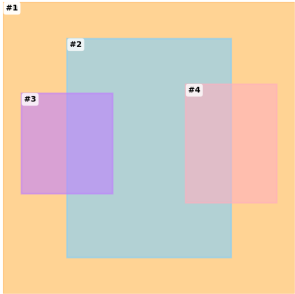 | 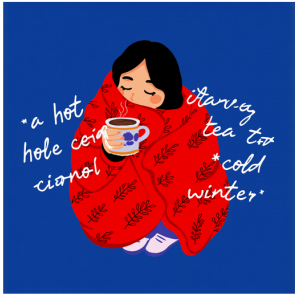 | 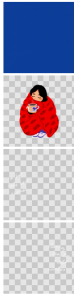 |
| <p>The image presents a striking and modern promotional design, characterized by a bold color scheme and dynamic composition. The background features a dramatic black marble texture, which adds depth and sophistication to the overall aesthetic. This dark backdrop contrasts sharply with the vibrant red and pink hues that form an abstract shape in the center, creating a visually engaging focal point. At the forefront, a figure is depicted in a stylish pose, wearing a black leather jacket over a white top. The positioning of the figure, slightly off-center, draws the viewer's eye and adds a sense of movement to the composition. The interplay of light and shadow enhances the textures of the clothing, emphasizing the fashionable elements of the image. Prominently displayed at the top is the text "New Collection," rendered in an elegant, bold font that is colored in a bright red. This choice of typography not only stands out against the background but also conveys a sense of urgency and excitement about the new offerings. Below the figure, the phrase "Special Offers Sale 50% off" is presented in a slightly smaller font, maintaining the same color scheme, which reinforces the promotional message. Additionally, a circular button labeled "Shop Now" is included, designed in a soft peach color that complements the overall palette while inviting immediate action. The artistic style of the image leans towards contemporary graphic design, utilizing clean lines and a mix of textures to create a polished look. The combination of the marble background with the vibrant colors and modern typography evokes a sense of luxury and trendiness, appealing to a fashion-forward audience. The overall theme of the image is promotional and stylish, aimed at attracting attention to a new fashion collection. The mood conveyed is energetic and inviting, encouraging viewers to engage with the brand and explore the offerings. This image would be well-suited for use in digital marketing campaigns, social media advertisements, or as part of an online store's promotional materials, effectively capturing the essence of modern fashion retail.</p> | 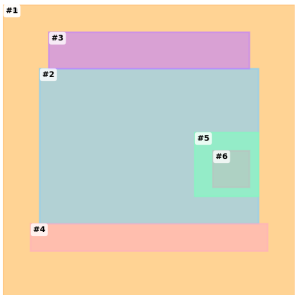 | 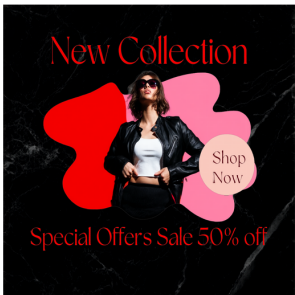 | 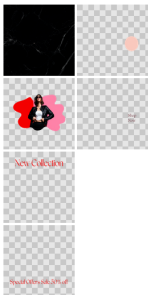 |

Figure 4. **Text-to-layers generation examples.** We visualize diverse text-to-layers generation results from our method, showing the input text prompts and corresponding multi-layer outputs. Each example displays individual transparent RGBA layers along with the merged composition. Our approach generates coherent multi-layer designs that maintain spatial consistency, stylistic harmony, and accurate layer boundaries, demonstrating strong alignment between text prompts and layered compositions.

Prompt

The image presents a vibrant and playful design celebrating the "Festa della Repubblica Italiana," or Italian Republic Day. The background is a bright turquoise blue, which creates a lively and cheerful atmosphere, evoking feelings of joy and festivity. At the center of the composition is the phrase "FESTA DELLA REPUBBLICA ITALIANA," prominently displayed in bold, white and red typography. The text is large and eye-catching, ensuring that it captures the viewer's attention immediately. The use of red for "ITALIANA" adds a dynamic contrast against the white, emphasizing the significance of the celebration. Surrounding the central text are various iconic landmarks and symbols associated with Italy, illustrated in a minimalist and cartoonish style. These elements include the Colosseum, the Leaning Tower of Pisa, the Arc de Triomphe, and the famous gondolas of Venice, among others. Each landmark is outlined in a simple black line, filled with soft colors that maintain a cohesive aesthetic. The landmarks are arranged in a circular pattern, creating a sense of unity and celebration, as if they are coming together to honor the Republic. Additionally, small decorative elements such as clouds, airplanes, and a sun are scattered throughout the design, enhancing the festive theme and suggesting a sense of movement and travel, which is often associated with national pride and exploration. The overall artistic style is modern and graphic, with clean lines and a playful approach that appeals to a wide audience. The use of bright colors and simple shapes contributes to a lighthearted and celebratory mood, making the image suitable for various contexts, such as social media posts, event promotions, or educational materials related to Italian culture and history. In terms of symbolism, the image encapsulates national pride and unity, celebrating Italy's rich heritage and the significance of the Republic Day. It could be effectively used in promotional materials for events, festivals, or educational campaigns aimed at raising awareness about Italian culture and history.

Layout

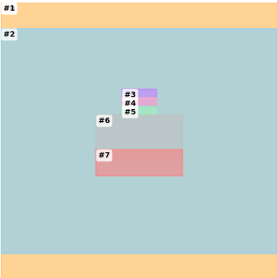

Generated

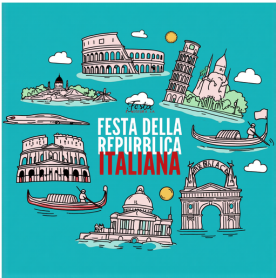

Layer Images

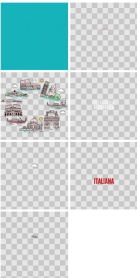

The image presents a vibrant and festive design celebrating the New Year, set against a deep navy blue background that evokes a sense of night and celebration. The color scheme predominantly features shades of blue, ranging from light to dark, which creates a harmonious and cool atmosphere. The background is smooth and uniform, providing a striking contrast to the other elements in the image. At the center of the composition are the bold, oversized numbers "2024," which represent the year 2024. The first two "2"s are styled in a gradient of light blue to dark blue, while the last number "4" is a solid light blue, giving it a slightly different visual weight. The numbers are arranged vertically, with the "4" positioned to the right, creating a balanced and dynamic layout. Interspersed among the numbers is the phrase "Happy New Year," written in an elegant, flowing script. The text is white, which stands out prominently against the dark background, and is positioned vertically between the numbers, enhancing the celebratory message of the image. The font style is playful yet sophisticated, adding to the festive mood. To the right of the numbers, there is a stylized disco ball, a classic symbol of celebration and parties. The disco ball is depicted in a light blue hue, surrounded by soft clouds and small stars, which adds a whimsical touch to the design. The reflective squares on the disco ball are illustrated in a way that suggests light and movement, further enhancing the festive atmosphere. The overall artistic style of the image is modern and graphic, with clean lines and a minimalist approach that emphasizes the key elements without overwhelming the viewer. The use of gradients and soft shapes contributes to a sense of depth and dimension, while the playful arrangement of the numbers and text creates a lively and engaging composition. The theme of the image is celebratory and joyful, perfectly capturing the excitement of welcoming a new year. The mood conveyed is one of optimism and festivity, making it suitable for various contexts, such as social media posts, digital invitations, or promotional materials for New Year's events. The combination of bold typography, festive imagery, and a cohesive color palette makes this image an effective and appealing representation of New Year celebrations.

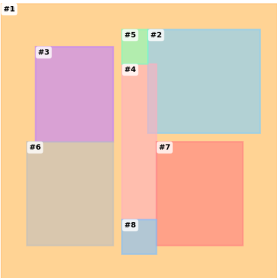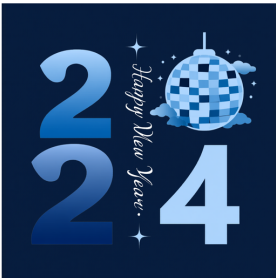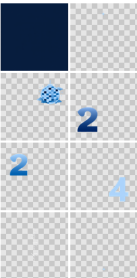

The image presents a visually appealing advertisement for a home furnishings and decor shop, featuring a rich teal background with a textured, painterly effect that adds depth and sophistication. The color scheme is predominantly teal, complemented by the warm tones of the food and decor elements showcased in the polaroid-style images. At the forefront, two polaroid frames are prominently displayed. The left frame features a beautifully arranged plate of food, showcasing slices of roasted pumpkin alongside a vibrant red apple and a glass of rosé wine. The plate is set against a backdrop of white dinnerware, with polished silver cutlery elegantly placed beside it. This arrangement suggests a cozy, inviting dining experience, perfect for gatherings or special occasions. The right frame captures a more elaborate table setting, adorned with a rustic wooden platter that holds an assortment of cheeses, nuts, and a small loaf of bread. The table is further enhanced by decorative elements such as tall, lit candles and a bouquet of flowers, which add a touch of warmth and charm. The use of soft, neutral tones in the tableware contrasts beautifully with the vibrant colors of the food, creating a harmonious and inviting atmosphere. The text elements are strategically placed to draw attention. The phrase "Order online 24/7" is written in a stylish, modern font that is easy to read, while the larger text "Home furnishings & decor" is presented in an elegant script, enhancing the overall aesthetic of the advertisement. The text is white, providing a striking contrast against the teal background, ensuring visibility and clarity. The artistic style of the image leans towards a contemporary and lifestyle-oriented aesthetic, with a focus on warmth and comfort. The use of natural light in the food photography creates soft shadows and highlights, adding a realistic touch that invites viewers to imagine the experience of enjoying the meals and decor. The overall theme of the image is centered around home and hospitality, conveying a mood of warmth, comfort, and togetherness. It suggests a lifestyle that values quality dining experiences and beautifully curated home environments. In terms of symbolism, the food and decor elements represent nourishment and the joy of gathering, making the image suitable for promoting products related to home dining and entertaining. This advertisement could effectively be used on social media platforms, in online marketing campaigns, or as part of a promotional flyer, appealing to customers looking to enhance their home dining experiences.

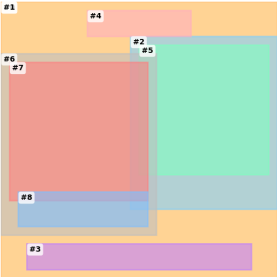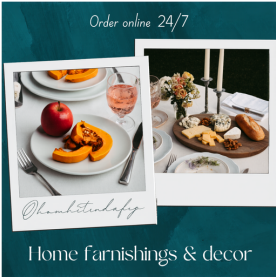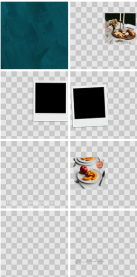

The image presents a modern and inviting promotional graphic designed to announce the reopening of a studio store. The background features a softly blurred interior of a clothing store, showcasing a rack of garments in various colors, including muted tones of blue, beige, and green. This creates a warm and welcoming atmosphere, suggesting a casual yet stylish shopping experience. At the forefront, a prominent rectangular overlay in a light cream color houses the main text. The bold, uppercase phrase "WE'RE BACK!" is centered within this overlay, rendered in a striking black font that captures immediate attention. Below this, in a smaller font, the message reads: "Studio store is open now. No appointment necessary," providing essential information in a clear and concise manner. The text is easy to read against the light background, ensuring that the message is communicated effectively. A call-to-action button, "COME FOR A FITTING," is positioned centrally within the overlay, featuring a rounded black background that contrasts sharply with the lighter text. This design choice emphasizes the invitation for customers to visit the store, enhancing the overall accessibility of the message. The artistic style of the image leans towards a contemporary digital design, characterized by clean lines and a minimalist aesthetic. The use of soft edges and a subtle drop shadow around the overlay adds depth, making the text and button appear to stand out from the background. The overall theme of the image is one of rejuvenation and excitement, conveying a sense of welcome and readiness to serve customers again. The mood is upbeat and inviting, encouraging potential shoppers to return to the store after a period of closure. In terms of symbolism, the image reflects themes of community and connection, suggesting that the store is eager to reconnect with its clientele. This graphic could be effectively used across various platforms, such as social media posts, email newsletters, or website banners, to attract attention and drive foot traffic to the store.

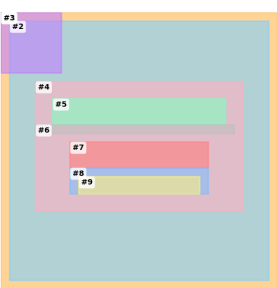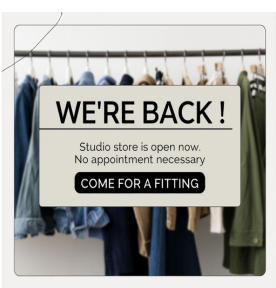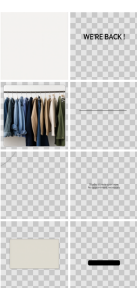

Figure 5. Additional text-to-layers generation examples. More examples demonstrating our method's capability to generate multi-layer designs from text descriptions. These results showcase the diversity of generated layouts, layer compositions, and visual styles.

Prompt

The image presents a vibrant and enticing advertisement for a seafood restaurant's lunch special. The background is a rich teal color, providing a striking contrast to the other elements in the composition. This deep hue is complemented by a lighter green rectangular banner at the top, which reads "Today's Offer," creating a clear focal point that draws the viewer's attention. At the center of the image is a beautifully plated dish featuring a whole fish, which is the star of the advertisement. The fish is presented with meticulous attention to detail, showcasing its grilled skin with distinct char marks, and garnished with fresh herbs and colorful edible flowers. The dish is artfully arranged, with a bed of vibrant orange garnishes that add a pop of color and texture, enhancing the overall visual appeal. Prominently displayed in bold, modern typography is the phrase "GET YOUR SPECIAL LUNCH MENU," which is positioned just above the fish. The text is in a large, light green font that stands out against the darker background, ensuring readability and impact. Below this, the price "ONLY \$5" is highlighted in a playful red starburst shape, further emphasizing the affordability of the offer and enticing potential customers. The overall artistic style of the image is contemporary and promotional, utilizing clean lines and a well-organized layout that effectively communicates the message. The use of high-quality photography for the food adds a realistic touch, making the dish look appetizing and inviting. The theme of the image is promotional and culinary, aimed at attracting customers to the restaurant for a special lunch deal. The mood conveyed is one of excitement and indulgence, encouraging viewers to take advantage of the offer. In terms of symbolism, the fish represents freshness and quality, key attributes for a seafood restaurant. The vibrant colors and appealing presentation suggest a delightful dining experience. This image could be effectively used in various contexts, such as social media posts, flyers, or website banners, to promote the restaurant's lunch specials and attract a wider audience.

Layout

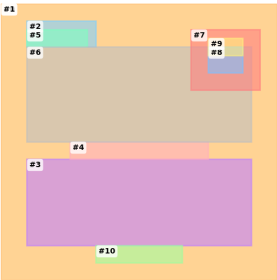

Generated

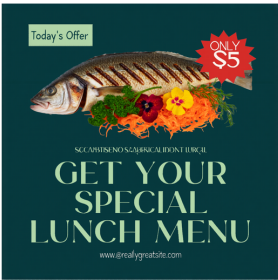

Layer Images

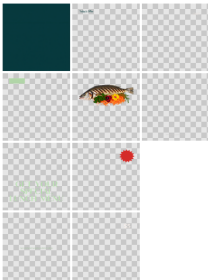

The image presents a vibrant and engaging advertisement for children's eyewear, set against a playful and colorful background. The overall background features a rich purple hue, which serves as a bold canvas for the promotional elements. This purple is framed by a lively orange border adorned with small polka dots, adding a cheerful and inviting touch to the design. At the top of the image, the text "CHILDREN'S EYEWEAR" is prominently displayed in large, white, bold letters, ensuring that the primary message is immediately clear and eye-catching. Below this, the phrase "GET 40% OFF" is presented in a smaller font, also in white, which contrasts well against the purple background, drawing attention to the promotional offer. The central part of the image includes a green oval shape that contains additional text and graphic elements. Inside this green oval, the phrase "CRAFTED FOR COMFORT, STYLED FOR SMILES" is written in a friendly and approachable font, reinforcing the product's appeal to both children and parents. Flanking the green oval are two playful graphic elements resembling puzzle pieces, colored in a bright yellow-orange. These elements add a whimsical touch to the composition, enhancing the overall theme of fun and creativity associated with children's products. The artistic style of the image is modern and graphic, utilizing bold colors and clear typography to convey its message effectively. The use of contrasting colors and playful shapes contributes to a lively and engaging atmosphere, making it suitable for a target audience of parents looking for stylish and comfortable eyewear for their children. Overall, the image conveys a theme of joy and accessibility, with a mood that is both inviting and cheerful. It is well-suited for use in marketing materials, social media promotions, or as part of a website dedicated to children's products, effectively capturing the attention of potential customers and encouraging them to take advantage of the discount offer.

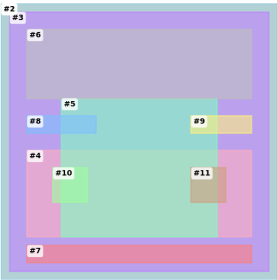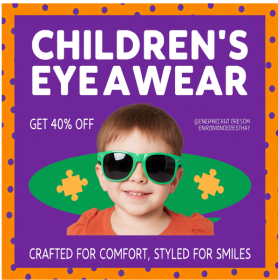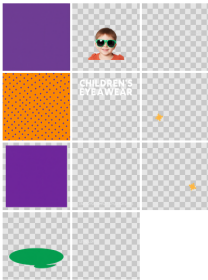

The image presents a warm and inviting scene that captures the essence of family camping during the autumn season. The background features a soft, cloudy sky with shades of gray, suggesting a cool, overcast day by the water. This natural setting is framed by the vibrant orange fabric of a tent, which creates a cozy and welcoming atmosphere. The orange hue contrasts beautifully with the cooler tones of the sky and water, adding a touch of warmth to the overall composition. In the foreground, a family of four stands together, facing away from the viewer. They are positioned centrally within the tent's opening, creating a sense of intimacy and connection. The family members are dressed in autumn-appropriate clothing, with the adults wearing brown and green jackets, while the children are clad in a mix of colors, including a green coat and a gray beanie. This choice of attire not only reflects the season but also emphasizes the theme of outdoor adventure and togetherness. At the bottom of the image, a dark brown banner spans the width, providing a strong visual anchor. The text within the banner reads "FAMILY CAMPING" in bold, white letters, which stand out prominently against the dark background. Above this, in a smaller, golden font, the words "AUTUMN SEASON" and "JOIN OUR FESTIVAL EVENT" invite viewers to participate in the festivities. A circular badge in the top right corner states "LIMITED TICKETS!" in a playful font, adding a sense of urgency and excitement to the event. The artistic style of the image is modern and clean, with a focus on realism that captures the genuine expressions and postures of the family. The use of soft edges and natural lighting enhances the inviting mood, making it feel both relatable and aspirational. The overall theme is one of family bonding and outdoor exploration, evoking feelings of nostalgia and warmth associated with autumn activities. Symbolically, the image represents togetherness, adventure, and the joy of spending quality time with loved ones in nature. It could be effectively used for promotional materials related to family camping events, social media posts, or as part of a marketing campaign for outdoor gear and activities. The combination of visual elements and text creates a compelling invitation for families to engage in memorable experiences during the autumn season.

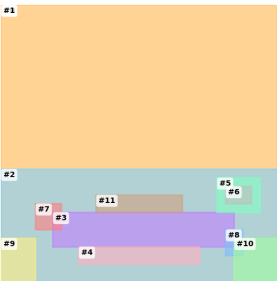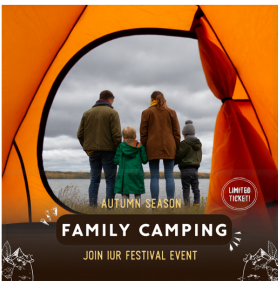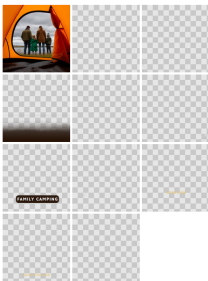

The image presents a clean and modern design that emphasizes the theme of contemporary architecture with a focus on sustainability. The background is a soft, muted white, which provides a neutral canvas that allows the main elements to stand out prominently. Surrounding the central design is a thin green border, enhancing the overall aesthetic and framing the content effectively. At the center of the image is a stylized illustration of a modern house, characterized by its triangular roof and wooden exterior. The house features large windows that reflect a contemporary architectural style, and it is complemented by a small deck area adorned with a railing. To the left of the house, there are two stylized trees, rendered in a vibrant green, which add a touch of nature and reinforce the theme of eco-friendliness. The house is depicted in a simplified, almost cartoonish style, which contributes to a friendly and approachable feel. Prominently displayed above the house is a circular badge that reads "SAVE 10%" in a playful font, suggesting a promotional offer. This element is designed to catch the viewer's attention and is colored in a bright green that harmonizes with the overall color scheme. Below the house, the text "MODERN ARCHITECTURAL DESIGNS" is presented in bold, uppercase letters, using a darker green that contrasts well with the lighter background. This text is clear and assertive, effectively communicating the primary focus of the image. Further down, a smaller text block provides additional information: "Energy-efficient systems, renewable materials, and passive design strategies." This text is written in a more subdued font, ensuring that it complements the bolder headings without overwhelming them. The overall composition is well-balanced, with the house and trees anchoring the visual elements while the text guides the viewer's eye. The artistic style of the image leans towards a minimalist and modern illustration, utilizing flat design techniques with clean lines and simple shapes. The use of green tones throughout the image not only emphasizes the theme of sustainability but also evokes feelings of growth and harmony with nature. The overall theme of the image is promotional and informative, aimed at attracting potential customers interested in modern architectural solutions that prioritize energy efficiency and sustainability. The mood conveyed is optimistic and forward-thinking, appealing to environmentally conscious individuals or businesses. This image could be effectively used in marketing materials, such as flyers, social media posts, or website banners, to promote architectural services or products that align with modern, eco-friendly design principles.

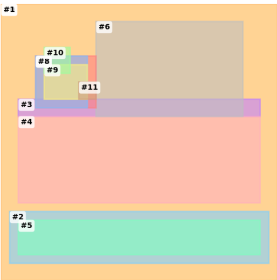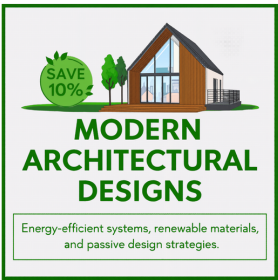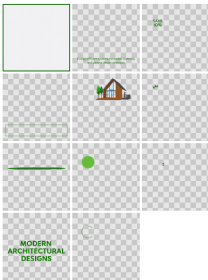

Figure 6. Additional text-to-layers generation examples.

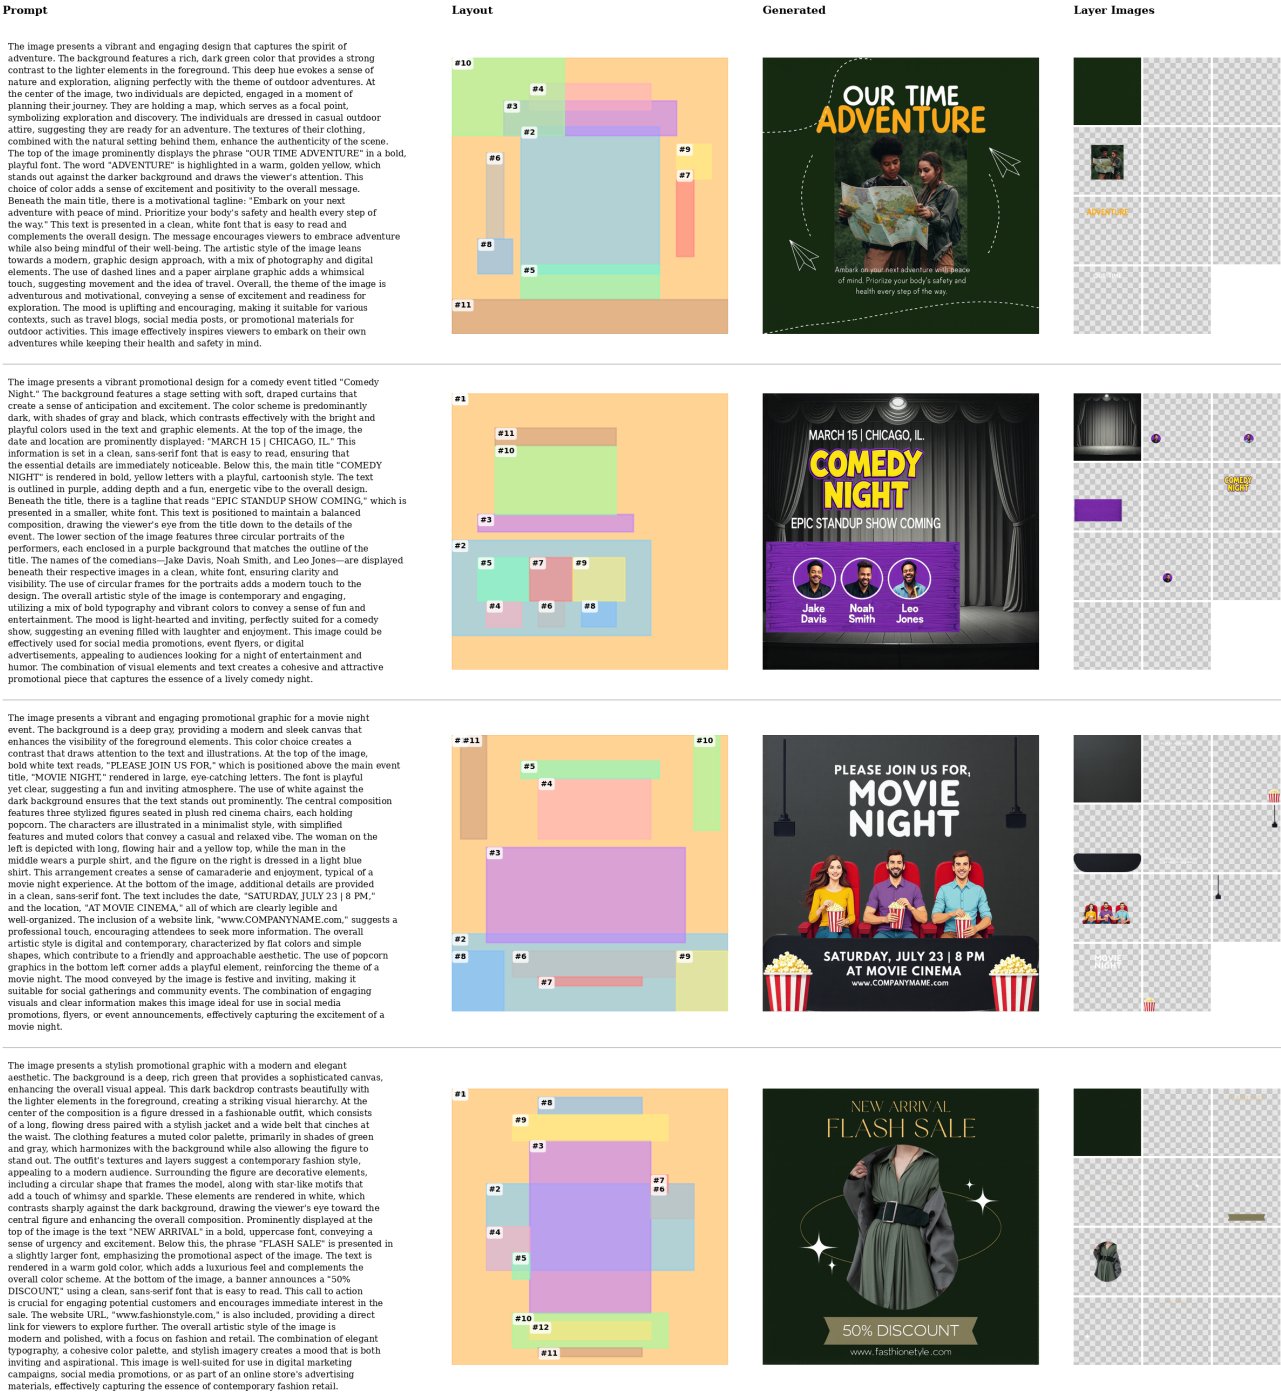

Figure 7. Additional text-to-layers generation examples.

Prompt

The image presents a vibrant and playful composition centered around a delicious pastry, likely a cinnamon roll or a similar baked good. The background features a dynamic pattern of swirling stripes in shades of lavender and white, creating a sense of movement and energy that draws the viewer's eye. The alternating colors of the background evoke a lighthearted and whimsical atmosphere, enhancing the overall appeal of the image. At the forefront, the pastry is prominently displayed, showcasing its golden-brown, flaky layers that spiral inward. The texture of the pastry is rich and inviting, with a glossy sheen that suggests a fresh-baked quality. The intricate details of the roll, including the visible swirls and layers, highlight the craftsmanship involved in its creation, making it the focal point of the image. Surrounding the pastry are bold, black letters that spell out "YProcsS" with the letters varying in size and orientation, adding to the playful and modern aesthetic. The typography is striking, with a mix of uppercase and lowercase letters that create a sense of spontaneity. Below the pastry, a rounded black banner contains the text "SHELLOP TISSERIE," rendered in a clean, sans-serif font that complements the overall design. This text serves to identify the brand or establishment associated with the pastry, reinforcing its artisanal quality. The artistic style of the image leans towards a contemporary graphic design approach, characterized by its use of bold colors, playful typography, and a focus on food aesthetics. The combination of the vibrant background and the detailed pastry creates a visually appealing contrast that is both eye-catching and appetizing. The theme of the image is celebratory and indulgent, evoking feelings of joy and satisfaction associated with enjoying a sweet treat. The mood conveyed is cheerful and inviting, making it an excellent choice for marketing materials related to a bakery or pastry shop. In terms of symbolism, the pastry represents comfort and indulgence, while the playful typography and background suggest a modern, trendy approach to food. This image could be effectively used in various contexts, such as social media promotions, advertisements for a bakery, or as part of a menu design, appealing to a youthful and vibrant audience looking for delightful culinary experiences.

Layout

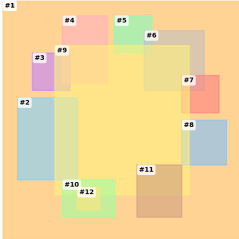

Generated

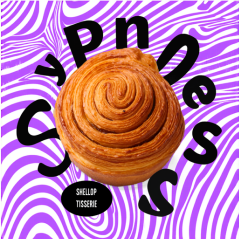

Layer Images

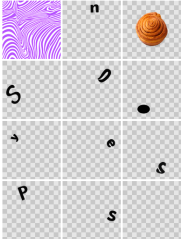

The image presents a vibrant and modern design, primarily featuring a bright blue background that conveys a sense of professionalism and creativity. The blue is complemented by a contrasting yellow rectangle at the top, which contains the text "We are" in a bold, sans-serif font. This combination of colors creates a visually appealing and energetic atmosphere. At the center of the composition is a figure dressed in a casual yet stylish outfit, consisting of a light pink oversized sweater and yellow shorts. The individual is holding a laptop, which is prominently displayed in front of them, suggesting a focus on digital technology and marketing services. The laptop screen is blank, which may symbolize the potential for creativity and innovation in digital marketing. The text "DIGITAL MARKETING AGENCY" is positioned prominently in white, bold letters, making it the focal point of the image. Below this, a smaller tagline reads, "We are ready to help your business marketing," which reinforces the agency's commitment to supporting clients. The font used here is clean and modern, enhancing the professional tone of the image. In the lower section, there is a yellow box with the call-to-action "CALL US" in white text, accompanied by a phone icon and a contact number "123-456-7890". The overall artistic style of the image is contemporary and graphic, utilizing flat design techniques that emphasize clarity and directness. The bright color scheme and modern typography contribute to a mood that is both inviting and professional, ideal for a digital marketing agency aiming to attract new clients. This image could be effectively used in various contexts, such as social media advertisements, website banners, or promotional materials, to convey the agency's services and encourage potential clients to reach out for assistance. The combination of engaging visuals and clear messaging makes it a strong representation of a modern marketing agency.

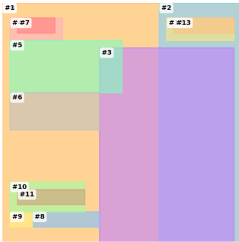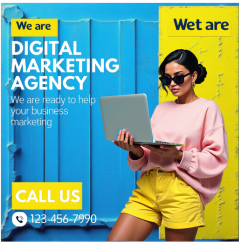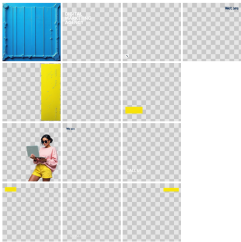

The image presents a modern and stylish promotional design for a clothing item, specifically a hoodie. The background features a soft, creamy beige color that creates a warm and inviting atmosphere. This neutral backdrop is complemented by abstract shapes in darker green tones, adding a touch of sophistication and visual interest without overwhelming the main elements. At the center of the composition is a figure seated on a wooden stool, dressed in a trendy outfit that includes a black hoodie with striking green accents. The hoodie is layered over a light-colored top, and the figure is wearing light-colored pants that contribute to a casual yet fashionable look. The choice of footwear, which consists of rugged boots, enhances the overall streetwear aesthetic. The figure's pose is relaxed, suggesting comfort and confidence in the attire. Text elements are strategically placed around the figure. The phrase "New Arrivals" is prominently displayed at the top in a playful, handwritten font, while the word "Hoodie" is featured in a bold, modern typeface that commands attention. Below the main title, a smaller line reads, "Clothes the spirit of fashion," which appears to be a typographical error for "Clothes." This text is presented in a more understated font, allowing the main message to stand out. Additionally, there is a call-to-action button that says "Order Now," designed in a contrasting dark green color that invites immediate engagement. The overall artistic style of the image is contemporary and clean, with a focus on minimalism that highlights the product. The use of soft shadows and subtle textures adds depth to the design, making it visually appealing. The theme of the image revolves around fashion and lifestyle, conveying a mood that is both trendy and approachable. It suggests a sense of modernity and casual elegance, appealing to a youthful audience interested in stylish clothing. In terms of symbolism, the hoodie represents comfort and versatility in fashion, while the overall design promotes a sense of accessibility to new trends. This image could be effectively used in various contexts, such as social media advertisements, online clothing stores, or promotional materials for fashion brands, aiming to attract customers looking for the latest in casual wear.

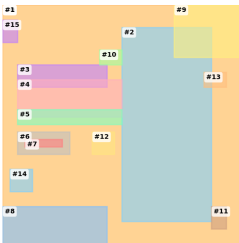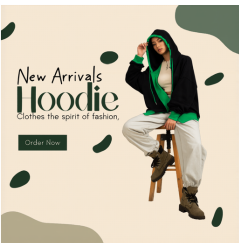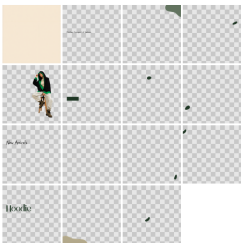

The image presents a vibrant and engaging promotional graphic centered around fresh fruit farming. The background features a clean, white grid pattern that adds a modern and organized feel to the composition, enhancing the overall visual appeal. In the foreground, a wooden crate brimming with fresh apples takes center stage. The apples are a mix of red and yellow hues, showcasing their natural freshness and inviting appearance. Some apples are partially obscured by green leaves, which add a touch of nature and vitality to the scene. The crate itself is positioned slightly to the right, creating a dynamic balance with the text elements on the left. The text "FRESH FRUITS FARMING" is prominently displayed in bold, green typography at the top of the image. The font is modern and sans-serif, contributing to a clean and contemporary aesthetic. Below this, a striking "45% OFF" is highlighted in a large, white font against a solid green background, drawing immediate attention to the promotional offer. This text is further emphasized by a playful, starburst-shaped "SALE!" graphic in yellow, which adds a sense of urgency and excitement. Additional text elements include a call-to-action "SHOP NOW" in a bold, white font on a dark green rectangular button, accompanied by an arrow pointing to the right, guiding the viewer's eye towards the next step. Below this, the address "123 Any St, Any City" is presented in a smaller, more understated font, ensuring that the focus remains on the promotional message. The overall artistic style of the image is modern and graphic, utilizing a combination of bold colors and playful shapes to create an eye-catching advertisement. The use of green tones not only aligns with the theme of freshness and nature but also evokes feelings of health and vitality. The theme of the image is promotional and inviting, aimed at attracting customers to purchase fresh fruits. The mood conveyed is energetic and positive, encouraging viewers to take advantage of the sale. This image could be effectively used in various marketing contexts, such as social media advertisements, flyers, or website banners, particularly for businesses related to agriculture, grocery stores, or health-focused brands. The combination of appealing visuals and clear messaging makes it a versatile tool for engaging potential customers.

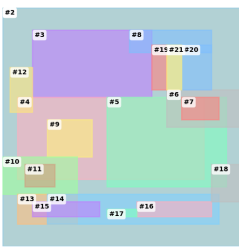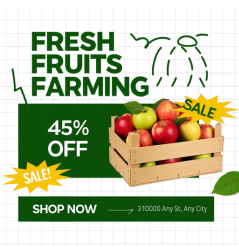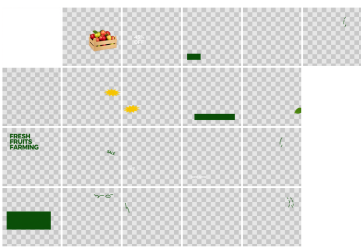

Figure 8. Additional text-to-layers generation examples.

Prompt

The image presents a vibrant and engaging promotional design for a winter bazaar themed around vinyl records. The background is a deep black, which serves to enhance the brightness of the other elements and create a striking contrast. Scattered throughout the background are colorful dots in various sizes, including white, orange, and purple, adding a playful and festive touch to the overall composition. At the center of the image, two stylized hands are depicted in a bold, graphic style, gripping a large pink vinyl record. The hands are rendered in shades of orange, yellow, and purple, creating a dynamic visual rhythm that complements the theme of the bazaar. Above the central illustration, the event title "Vinyl Lover Winter Bazaar" is prominently displayed in an elegant, cursive font that is white and slightly whimsical, evoking a sense of creativity and fun. Below this title, a tagline reads, "START THE COOLEST SEASON WITH A RECORD," in a simpler sans serif font, reinforcing the event's theme and inviting participation. The lower section of the image contains essential event details, including the date "DEC 10, 20XX," the time "4:00 PM," and the location "15TH AVENUE, LONDON." This text is presented in a clean, modern font that is easy to read against the black background, ensuring that the information is accessible. The overall artistic style of the image is modern and playful, with a digital illustration technique that emphasizes bold colors and graphic shapes. The use of contrasting colors and whimsical elements creates an inviting and energetic mood, perfect for attracting music lovers and potential attendees. In terms of symbolism, the image captures the essence of community and celebration associated with music and vinyl culture. It suggests a gathering of like-minded individuals who share a passion for records, making it an ideal visual for social media promotions, event flyers, or posters aimed at music enthusiasts. The lively design and engaging elements make it suitable for various marketing contexts, particularly in the realms of music, art, and community events.

Layout

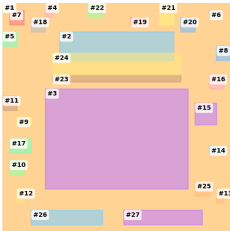

Generated

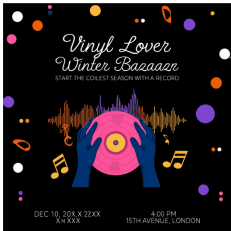

Layer Images

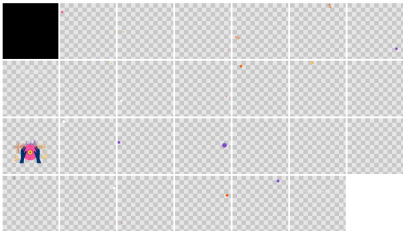

The image presents a promotional advertisement for a tanning salon, characterized by a clean and modern design. The background is a soft beige color, providing a warm and inviting atmosphere that complements the theme of sun-kissed skin. At the center of the composition is the word "Tanning," rendered in a bold, elegant serif font that commands attention. The letters are predominantly black, creating a striking contrast against the lighter background. Below this, the word "Salon" is displayed in a more delicate, cursive font, adding a touch of sophistication to the overall design. Flanking the central text are two geometric shapes in a deep blue hue, which serve as visual anchors. These shapes are adorned with circular motifs that resemble stars, enhancing the theme of beauty and radiance associated with tanning. The use of these shapes adds a modern flair to the advertisement, while the star motifs suggest a sense of glamour. Prominently featured in the corners of the image are bright yellow starburst shapes that read "50% OFF," effectively drawing the viewer's eye and emphasizing the promotional aspect of the advertisement. This use of color not only highlights the discounts but also adds a playful element to the design. The overall artistic style is contemporary and graphic, utilizing clean lines and a balanced composition to convey a professional yet approachable image. The mood of the advertisement is upbeat and inviting, aiming to attract potential customers looking to enhance their appearance through tanning services. In terms of symbolism, the elements of the design—such as the stars and the warm color palette—evoke feelings of summer, beauty, and self-care. This image could be effectively used in various marketing contexts, such as social media promotions, flyers, or website banners, to attract clientele to the tanning salon and promote its services.

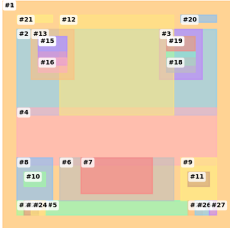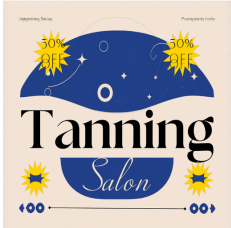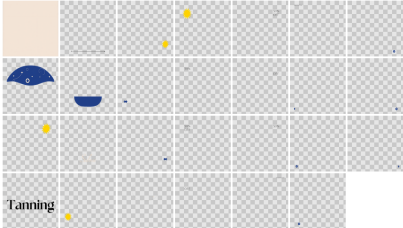

Figure 9. Additional text-to-layers generation examples. Our unified framework handles various design complexities, from simple compositions to intricate multi-element designs with over 25 layers, while maintaining generation quality.

The image features a vibrant Halloween theme with dominant colors of purple, orange, and black. Key elements include a young girl in a witch costume, two glowing ghosts, a carved pumpkin, and a large spider, totaling five main objects. The girl and pumpkin are central and prominent, with the ghosts and spider providing balance. The background showcases a cityscape with tall buildings, adding depth and a sense of scale. The texture is glossy and vector-like, with smooth gradients and a cartoonish style. The text 'HAPPY HALLOWEEN' is bold, uppercase, and centered at the top, using a sans-serif font in white and orange, creating a playful and festive mood. The composition is balanced with elements ...

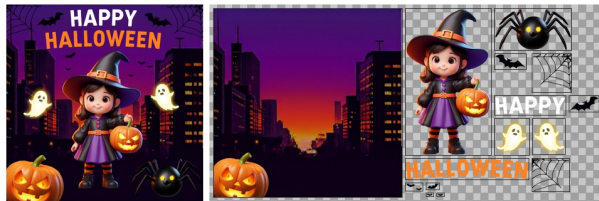

The image features a cat wearing a chef's hat and apron, cooking in a kitchen with warm, earthy tones dominating the scene. The cat is the central figure, prominently positioned in the foreground, stirring a red pan on a stove. The kitchen is detailed with wooden cabinets and utensils, creating a cozy, homely atmosphere. The textures are realistic and glossy, with a photographic quality that enhances the lifelike appearance of the cat and the kitchen setting. The lighting is soft and natural, casting gentle shadows and highlighting the cat's fur and the steam rising from the pan. The composition is balanced, with the cat centrally aligned and surrounded by kitchen elements that add depth and context. The theme ...

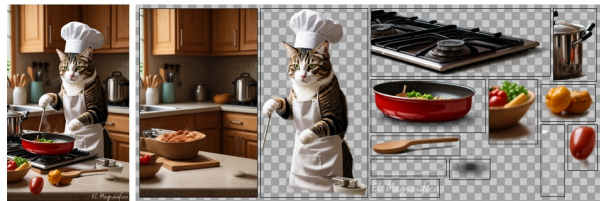

The image features a dominant blue and green color palette with a large coffee cup in the foreground, prominently displaying the text 'SALAMINA CIUDAD LUZ' in bold, uppercase serif font. The background showcases a lush, illuminated coffee plantation with glowing yellow orbs among the plants, creating a magical, serene atmosphere. The coffee cup is centrally placed, with steam rising, suggesting warmth and comfort. The layout is balanced with the cup in the foreground and the plantation extending into the distance, leading to a full moon in the sky. The texture is a mix of vector and photographic elements, with a glossy finish on the cup and a more natural, textured look for the plants. The overall ...

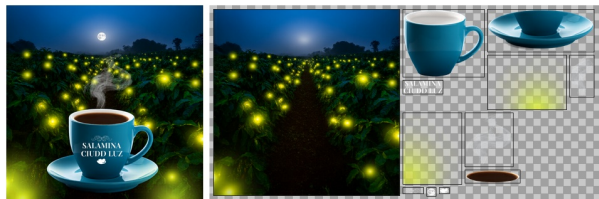

The image features a picturesque cottage with a thatched roof, surrounded by lush greenery and blooming pink flowers. Dominant colors include soft greens and pinks, with the cottage's white walls providing a neutral backdrop. The cottage has two prominent chimneys and several windows adorned with flower boxes. The path leading to the cottage is gently curved, adding a sense of depth and inviting the viewer into the scene. The texture is smooth and painterly, with a soft, warm light casting gentle shadows, enhancing the serene and idyllic mood. The composition is balanced, with the cottage centrally placed and framed by the surrounding foliage, creating a harmonious and tranquil atmosphere. No visible text ...

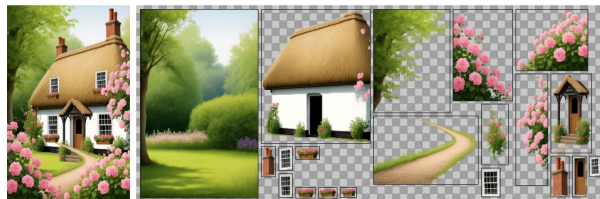

The image features a woman seated at an outdoor café, with dominant colors of blue, black, and white. She wears a blue headscarf and a black off-shoulder top, paired with a white skirt. The café setting includes a wooden table with a colorful tablecloth and a drink with a blue straw. The background is a mix of blurred signage and café elements, creating a vibrant yet relaxed atmosphere. The composition is balanced with the woman centrally positioned, and the texture is predominantly photographic with a focus on natural light and soft shadows. The mood is casual and stylish, with no visible text present.

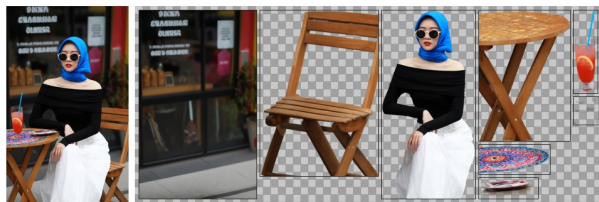

The image features a vintage-themed poster with a dominant color palette of warm browns, reds, and golds, accented by deep blues. Dominant colors include soft greens and pinks, with the cottage's white walls providing a neutral backdrop. The central focus is the grand arched facade of 'DALLAS UNION STATION', with its intricate architectural details and large, bold serif typography. The poster includes multiple human figures, approximately 15, dressed in early 1900s attire, positioned in front of two steam locomotives, creating a sense of historical depth. The background showcases a cloudy sky, adding to the nostalgic mood. The layout is symmetrical, with text such as 'NIST BBNDÉBO' and 'THIAX SATUIRS' aligned centrally, creating a balanced composition. The texture is a mix of photographic realism and vector-like ...

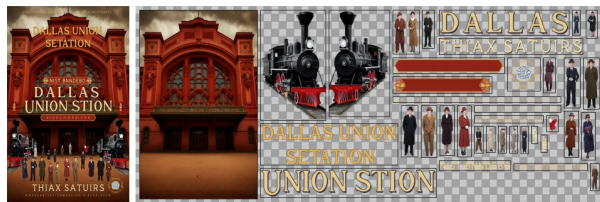

The image features a dramatic and intense scene with dominant dark and fiery colors, including deep reds, blacks, and oranges. Central to the composition is a muscular man seated on a throne made of swords, suggesting power and conflict. The throne and the man's armor have a metallic texture, contrasting with the flat, cracked ground scattered with red petals. In the background, a woman walks away, adding depth and narrative tension. The typography is bold and serif, with the title 'RUIN OF THE WARLORD'S HEART' prominently displayed in a cracked, fiery style, and 'ISLANA VESPER' in a smaller, elegant script. The overall theme is epic and dramatic, with a mood of despair and intensity.

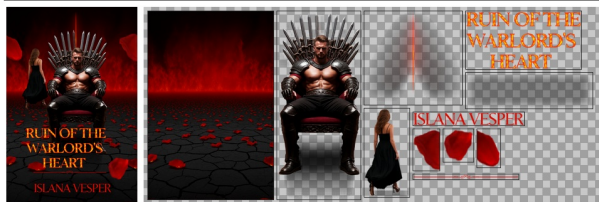

The poster features a playful and vibrant design with dominant colors of green and blue, accented by yellow and white. It includes three key images of a person in a racing jacket, with the largest image prominently placed in the center. The background is a mix of a grassy texture and a sky with clouds, creating a whimsical and cheerful mood. The layout is dynamic, with overlapping images and playful doodles like hearts and stars scattered throughout. Typography is bold and sans-serif, with the text 'HANNI' and 'little bunny' in uppercase and lowercase respectively, adding to the playful theme. The composition is balanced with a mix of photographic and vector elements, including a yellow flower button and a ...

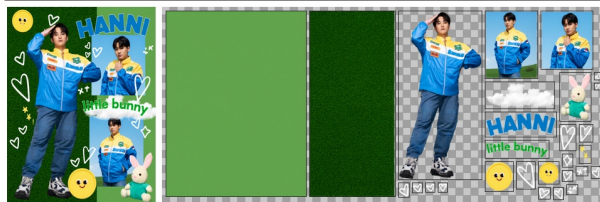

The poster features a dominant blue color with secondary accents of white and neon green. It prominently displays a large blue Adidas shoe with white stripes, positioned centrally and slightly tilted, creating a dynamic effect. The shoe is layered over a tennis court background, with multiple tennis balls in motion, adding a sense of action. The texture is a mix of glossy and matte, with the shoe appearing more textured and the background flat. The Adidas logo is placed at the top, and the text 'Adidas Barricade' in bold, sans-serif font is at the bottom, aligned centrally. The composition includes a polaroid-style image of the shoe, adding depth and a playful mood. The overall theme is sporty and ...

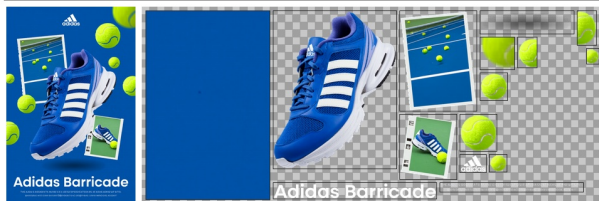

The image features a laptop prominently in the center, with a dark, blurred background of bokeh lights in red and orange hues, creating a warm and focused atmosphere. The word 'EDITING' is displayed in large, bold, white uppercase letters at the top, with a date and time above it in smaller, sans-serif font. Several software icons, including 'Lr', 'Ai', 'Ae', and 'Ps', are floating around the laptop, adding a dynamic and creative touch. The laptop screen shows a software interface, suggesting a digital workspace theme. The overall composition is balanced with the text and icons creating a sense of depth and layering. The bottom left corner contains the text 'Still figuring it out, but I'm getting better ...

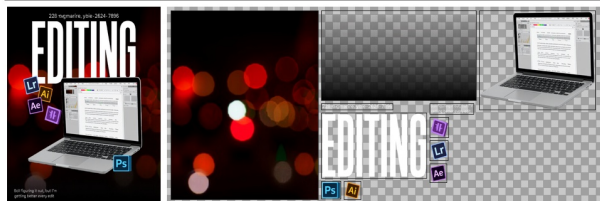

Figure 10. Additional text-to-layers generation examples. Our model can generate rich images along with high-quality layers beyond flat designs.

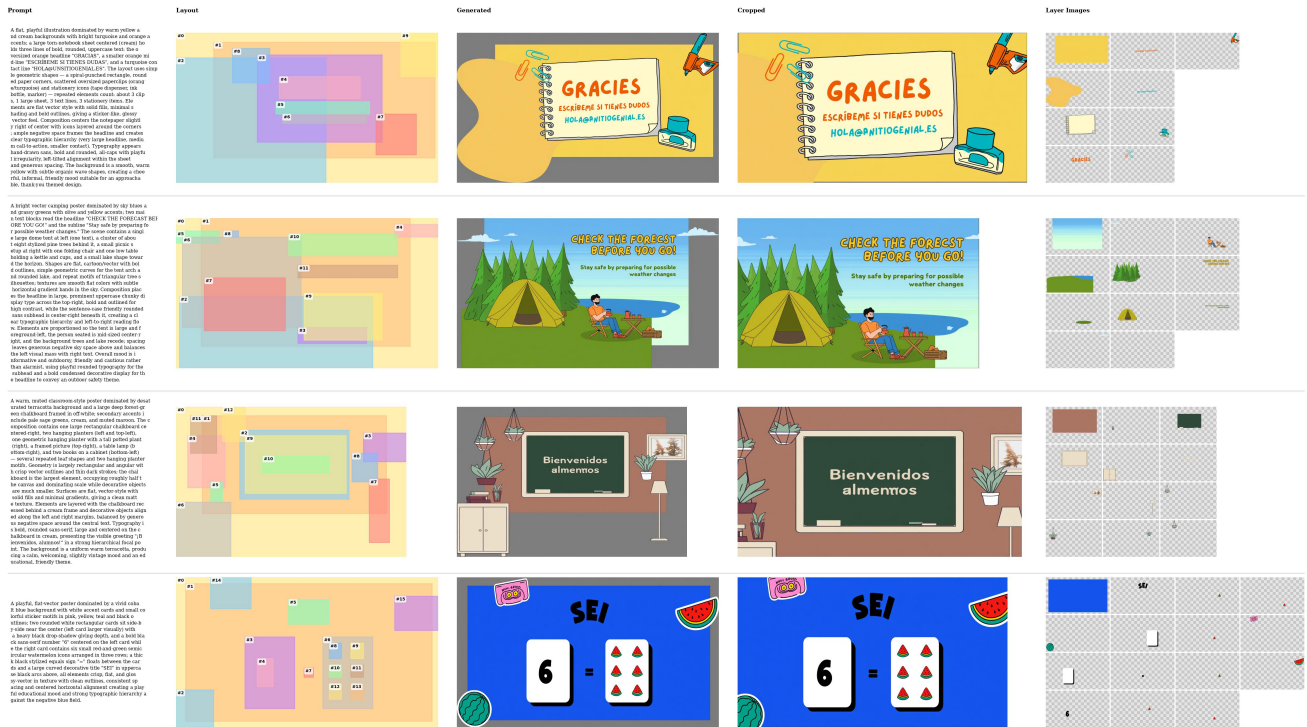

Figure 11. **Text-to-layers with overflow layer generation.** Additional examples highlighting our method’s unique capability to generate overflow layers that extend beyond the background boundary. As discussed in Section 3 and shown in Fig. 3, over 60% of designs contain overflow layers. Our approach generates complete full-size RGBA layers on the canvas, preserving editability and reusability that previous methods sacrifice by truncating pixels at background boundaries.

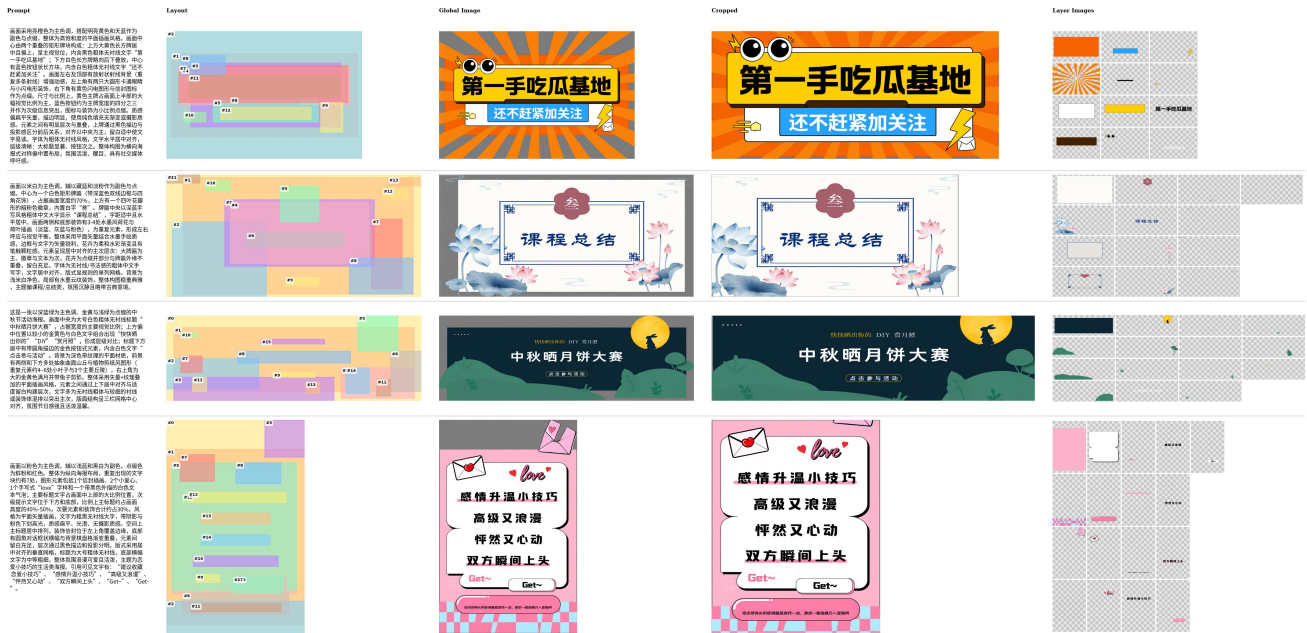

Figure 12. **Text-to-layers with multilingual support.** Examples demonstrating our model’s capability to generate designs with multilingual text layers. Our dataset includes diverse languages (as shown in Fig. 2), enabling generation of visually rendered text in multiple languages including Chinese. This showcases the model’s ability to handle typography across different writing systems while maintaining design quality.

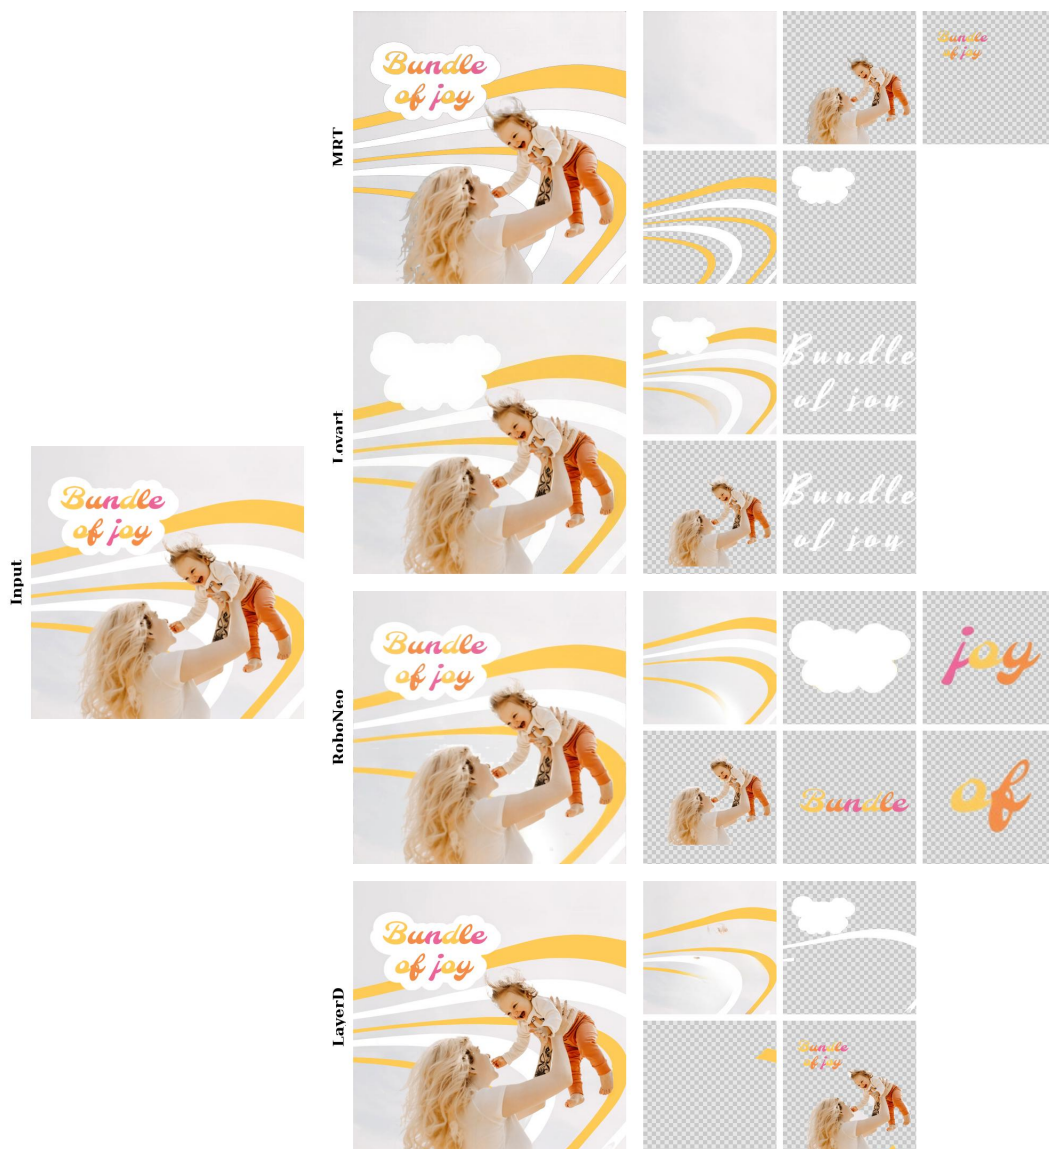

Figure 13. **Qualitative comparison on image-to-layers task.** We compare our method with LayerD, Lovart, and RoboNeo on decomposing a graphic design into transparent layers. Each panel shows: the input image (top-left), followed by our result and baseline results with their decomposed layers. Our method produces cleaner layer boundaries, better granularity, and more complete RGBA layers compared to the baselines.

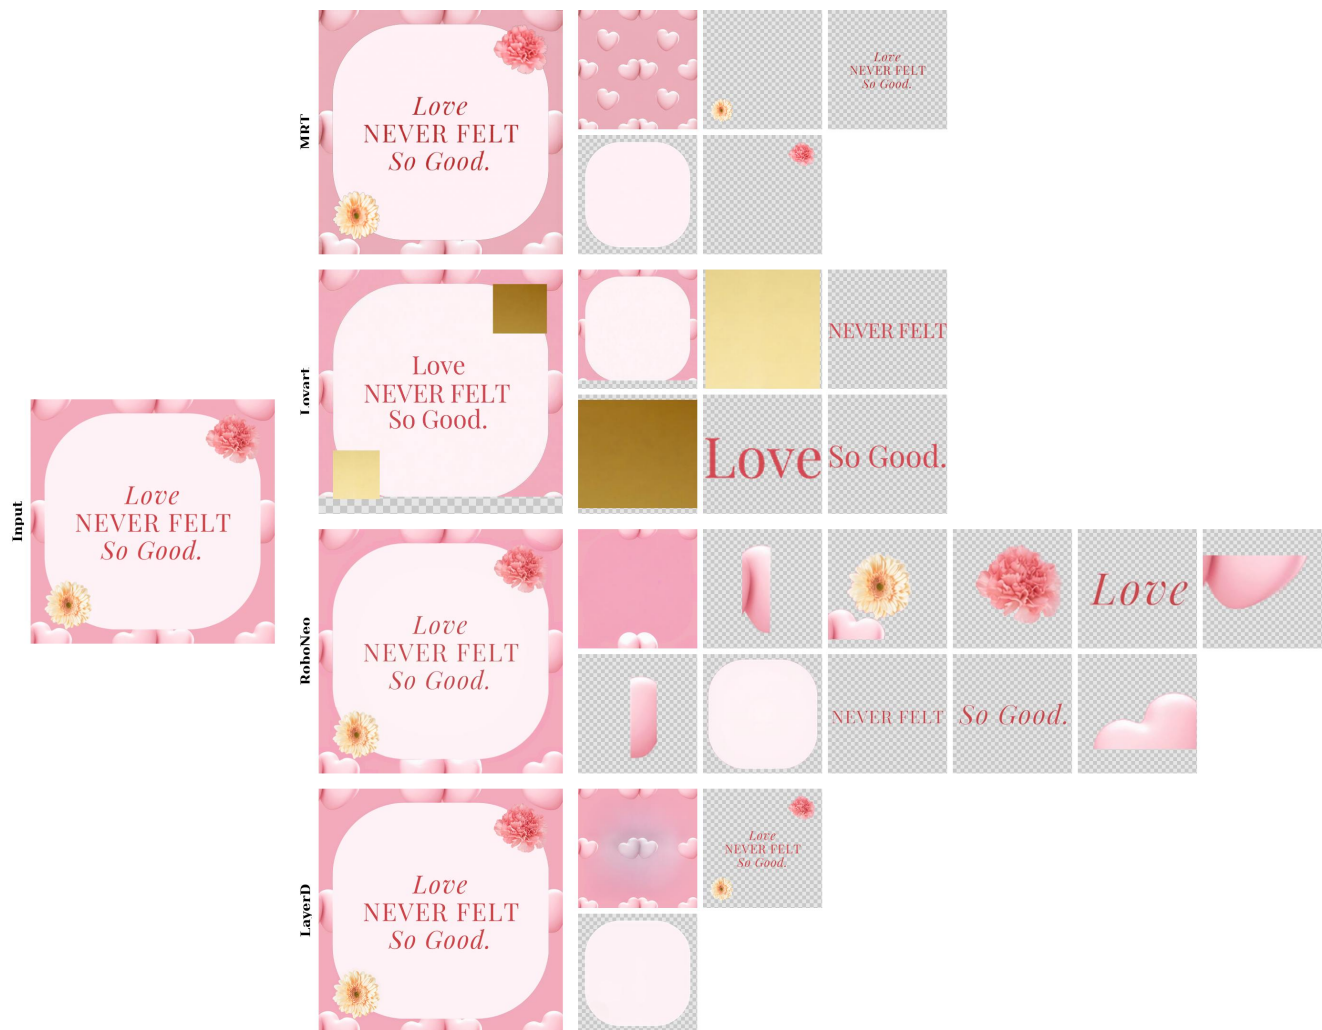

Figure 14. **Additional qualitative comparison on image-to-layers task.** Our method demonstrates superior layer decomposition quality with better semantic correctness and transparency handling. The decomposed layers from our method maintain higher integrity and can faithfully reconstruct the input image, while baselines show issues with layer artifacts, improper grouping, or incomplete decomposition.

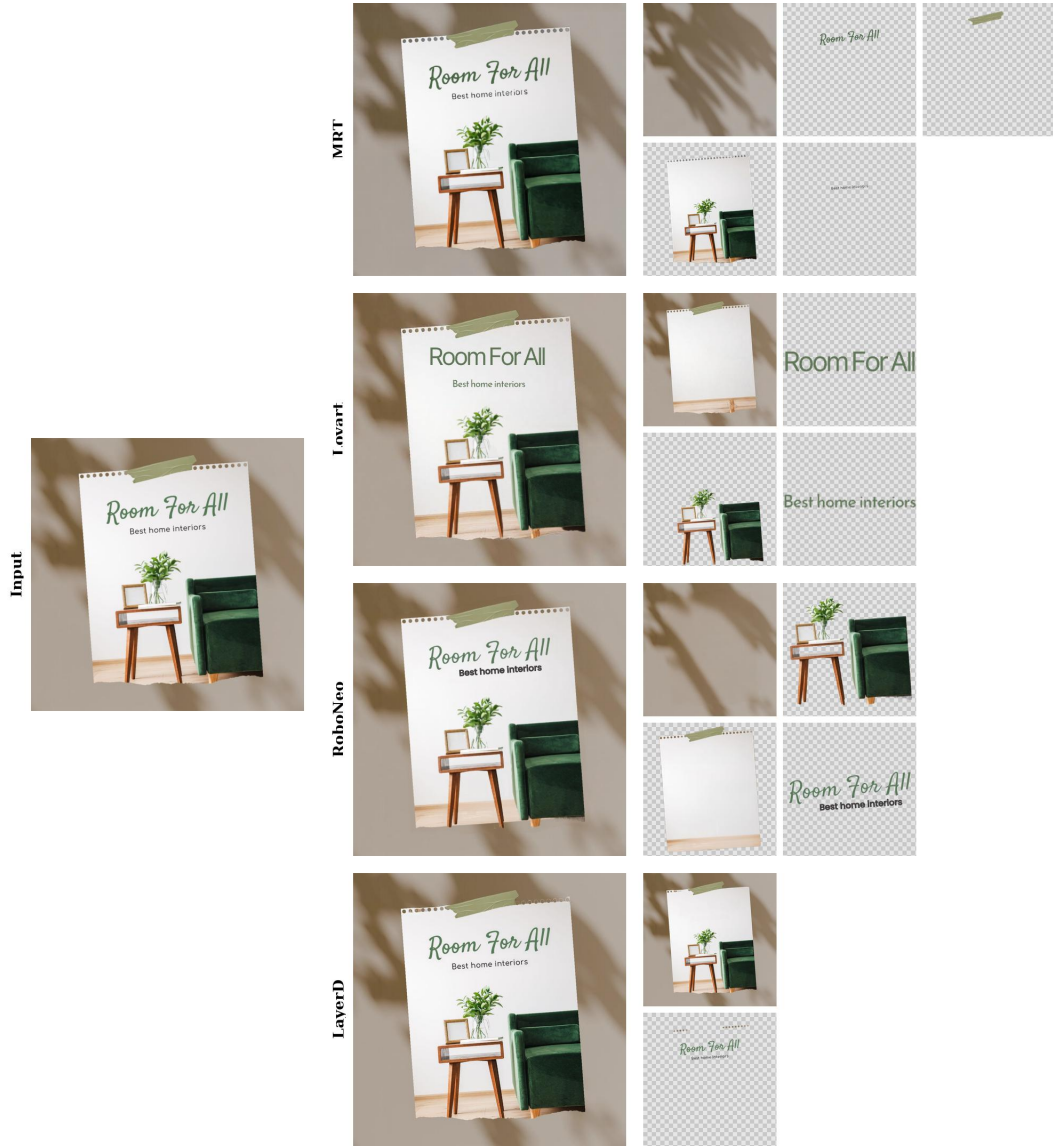

Figure 15. **Additional qualitative comparison on image-to-layers task.** This example further demonstrates our method’s advantages in layer quality, integrity, and appropriate granularity. Our approach successfully decomposes complex compositions while avoiding the overly grouped layers produced by LayerD or the artifacts present in commercial system outputs.

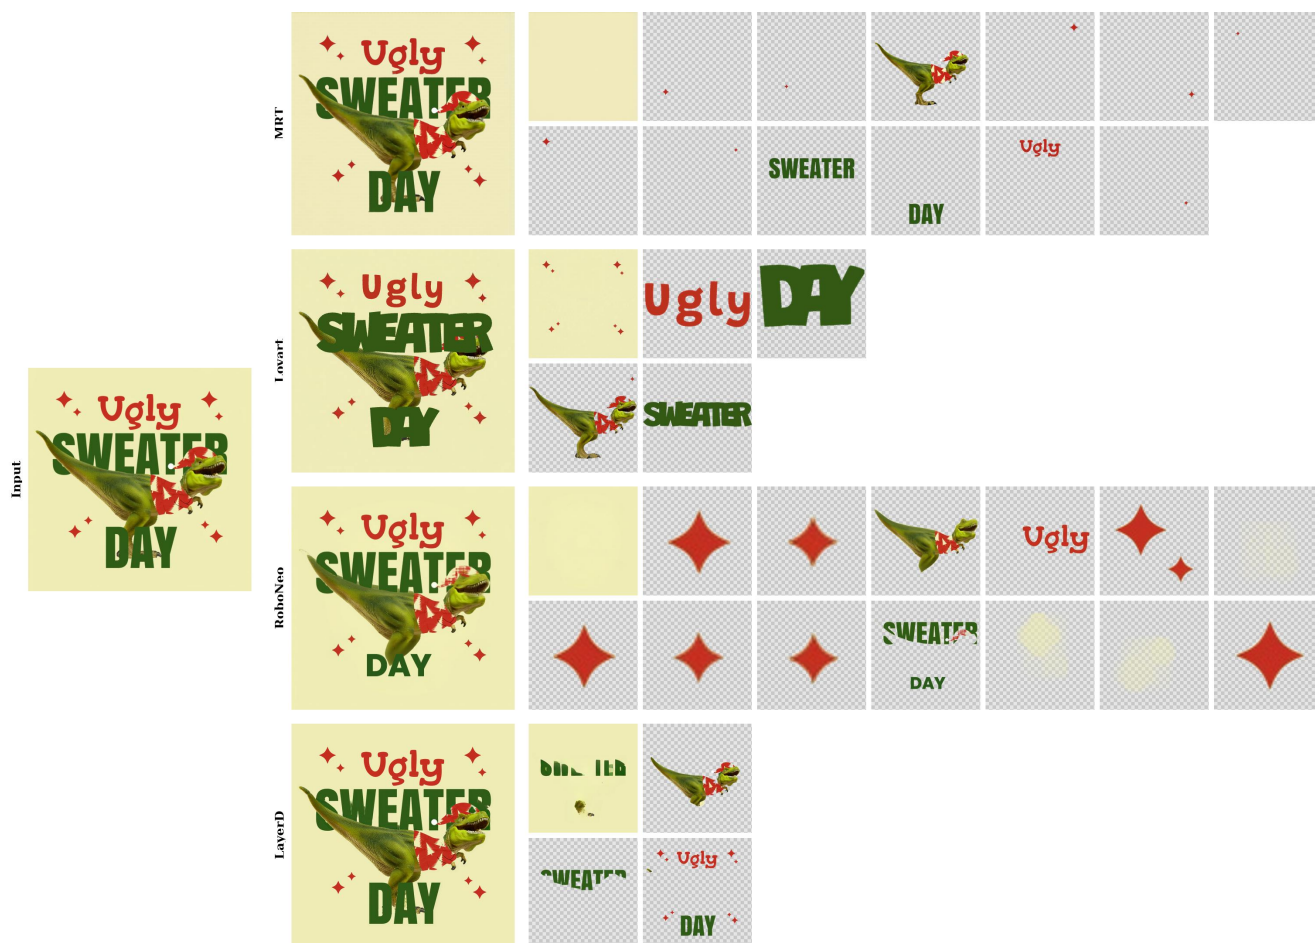

Figure 16. **Additional qualitative comparison on image-to-layers task.** Our method consistently outperforms baselines across different design styles and complexities. The visualization shows that our approach produces high-quality transparent layers with accurate alpha channels and proper semantic decomposition, essential for downstream editing tasks.

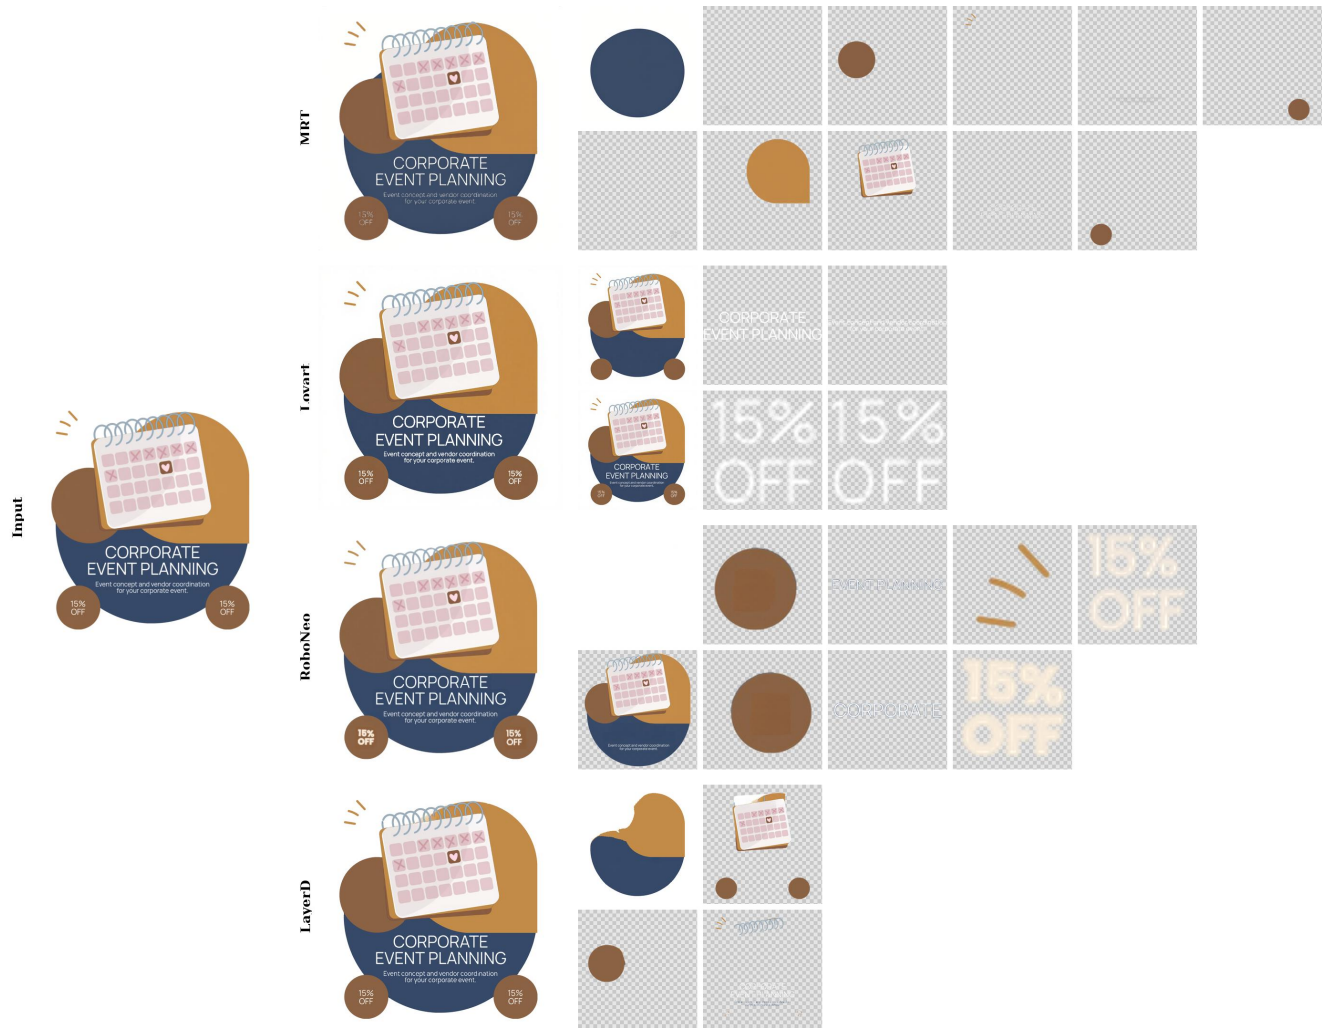

Figure 17. **Additional qualitative comparison on image-to-layers task.** This case highlights our method’s ability to handle complex multi-element designs. While commercial systems like RoboNeo suffer from severe artifacts and LayerD produces overly grouped layers that compromise fine-grained editing flexibility, our method maintains both quality and appropriate decomposition granularity.

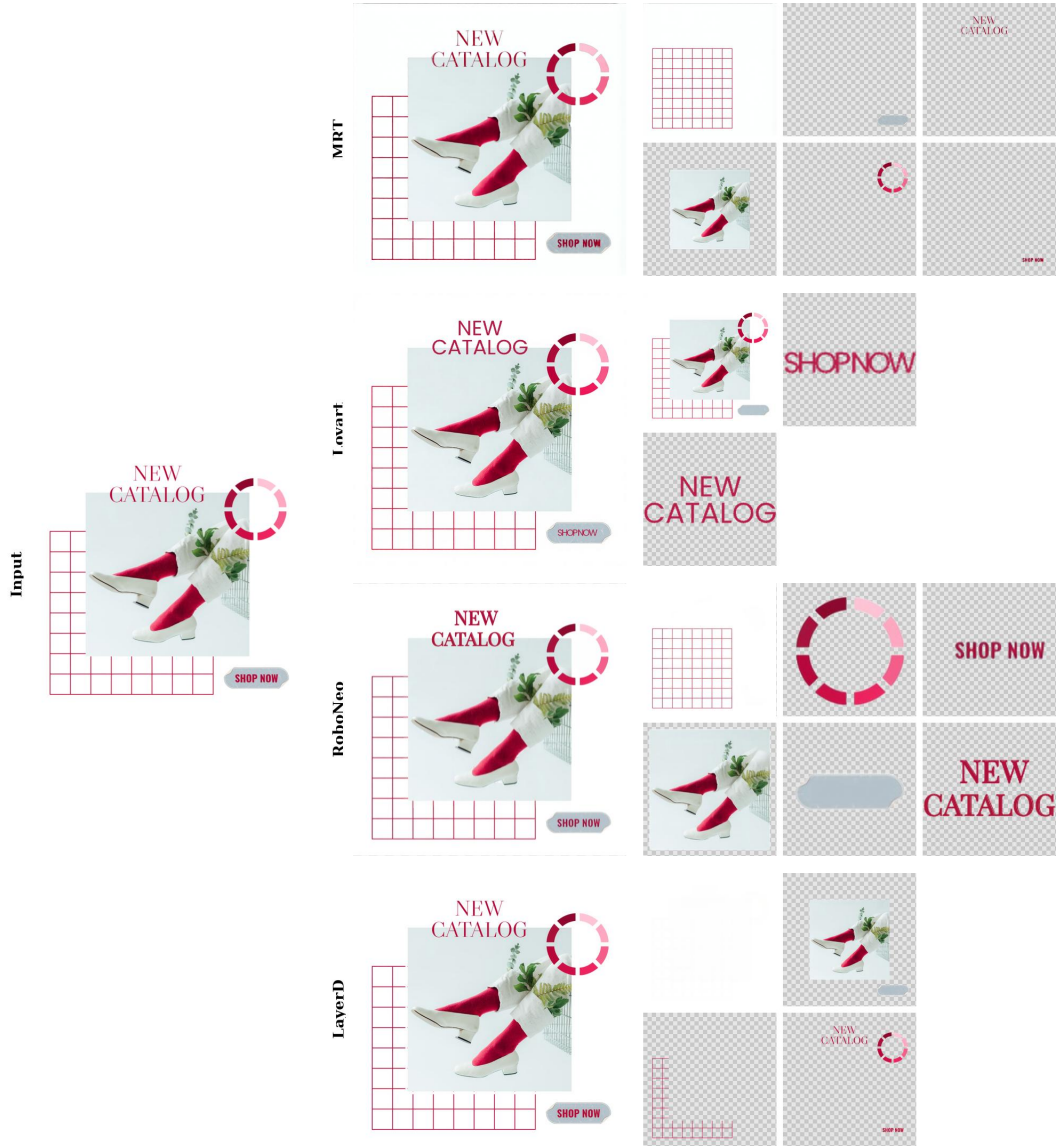

Figure 18. **Additional qualitative comparison on image-to-layers task.** Our method excels at decomposing designs with overlapping elements and complex visual hierarchies. The comparison demonstrates superior performance across all three evaluation dimensions: quality (semantic correctness and transparency), integrity (faithful reconstruction), and granularity (appropriate decomposition level).

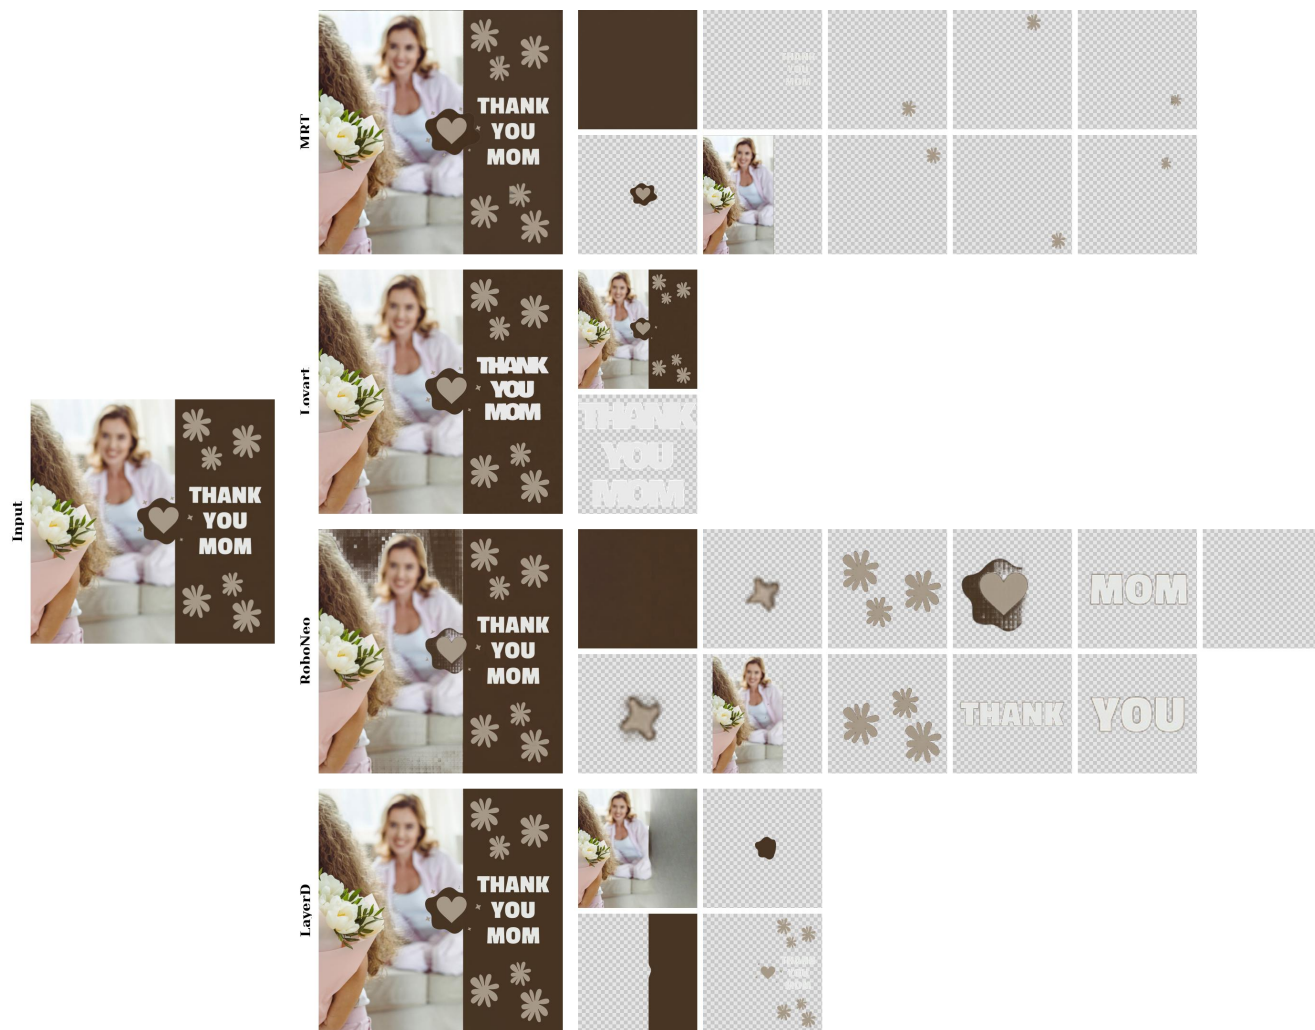

Figure 19. **Additional qualitative comparison on image-to-layers task.** This example showcases our method’s robustness across different design categories. Our decomposed layers maintain sharp boundaries, clean transparency, and semantic coherence, enabling practical editing workflows that commercial and academic baselines struggle to support.

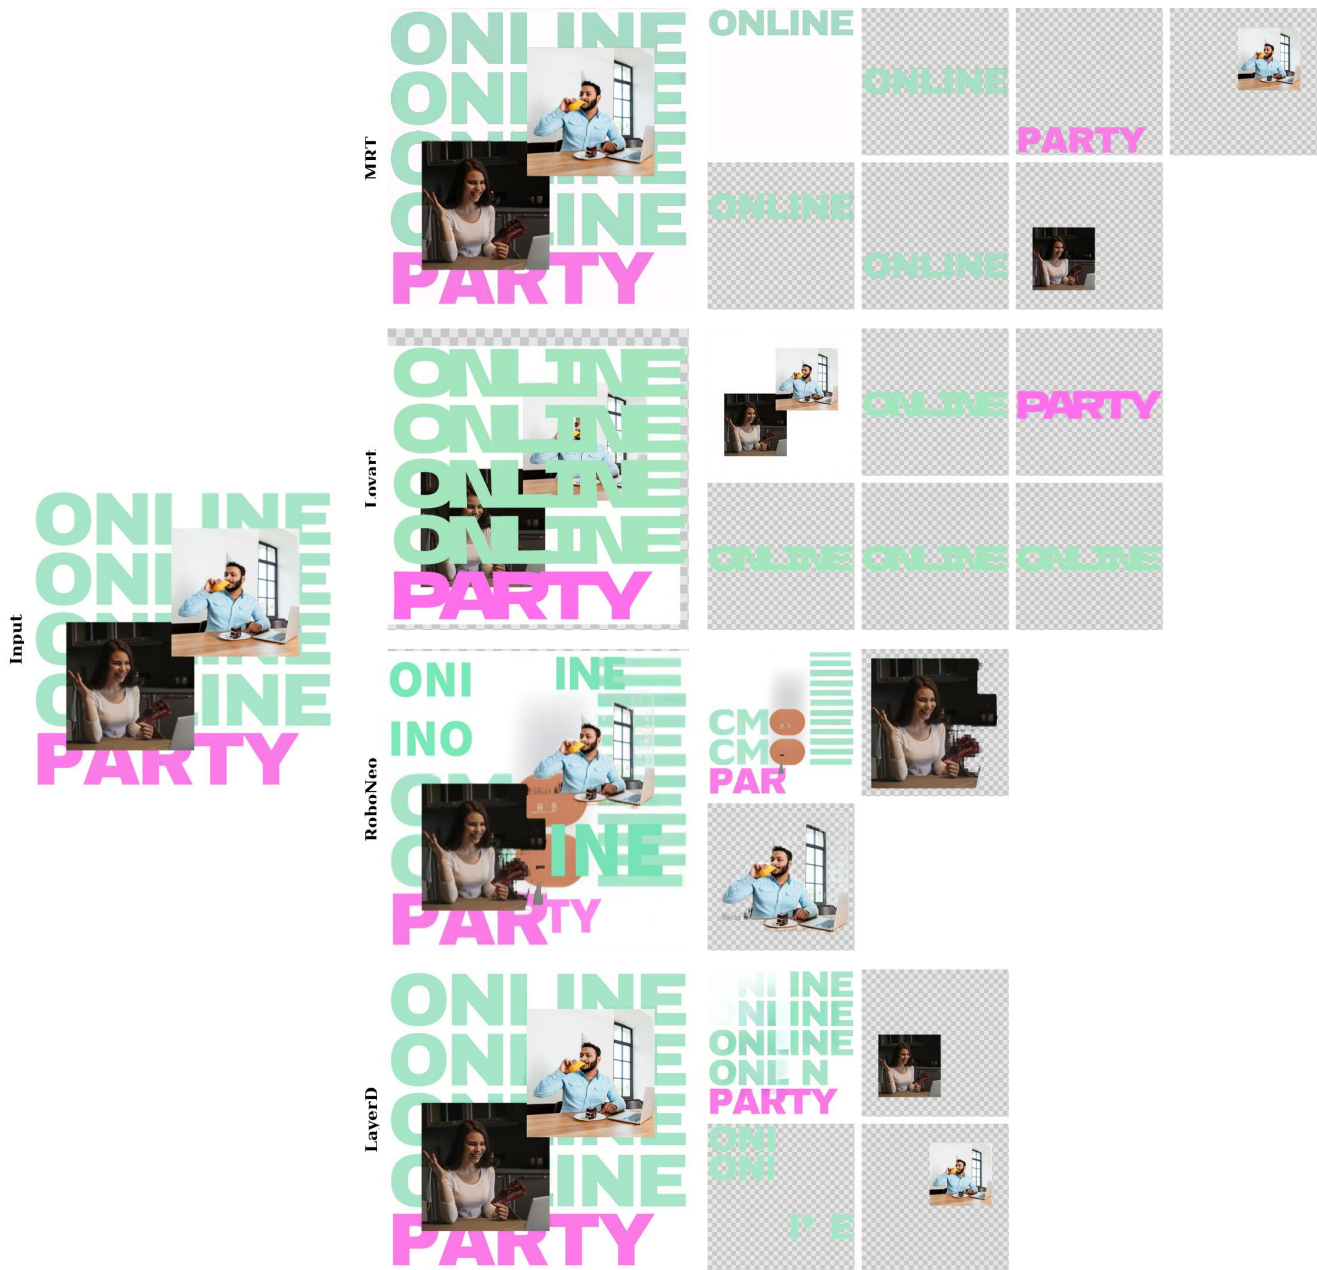

Figure 20. **Additional qualitative comparison on image-to-layers task.** Final comparison case demonstrating consistent quality advantages of our method. The decomposition preserves layer reusability and editability while maintaining visual fidelity, confirming the effectiveness of our masked region transformer framework for the image-to-layers task.

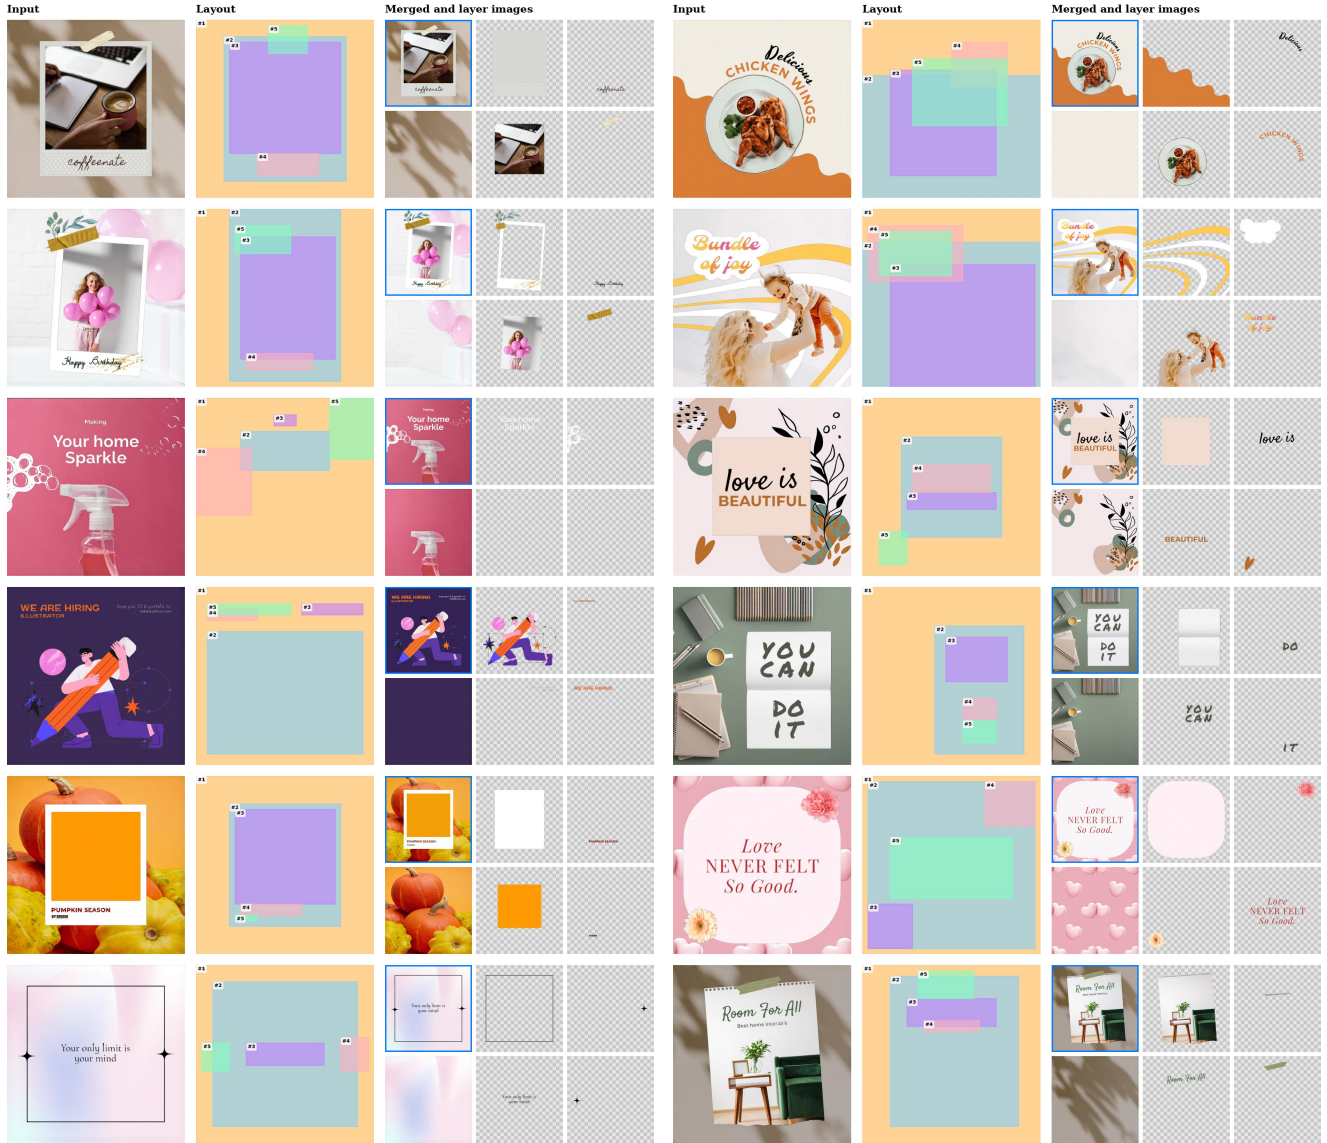

Figure 21. **Image-to-layers visualization with 6 layers.** We visualize the layer-by-layer decomposition process showing individual RGBA layers with transparency. Each layer is displayed separately along with its alpha mask, and the merged composition demonstrates faithful reconstruction of the input design. This visualization demonstrates our method’s ability to generate clean, reusable layers with accurate spatial boundaries and alpha channels.

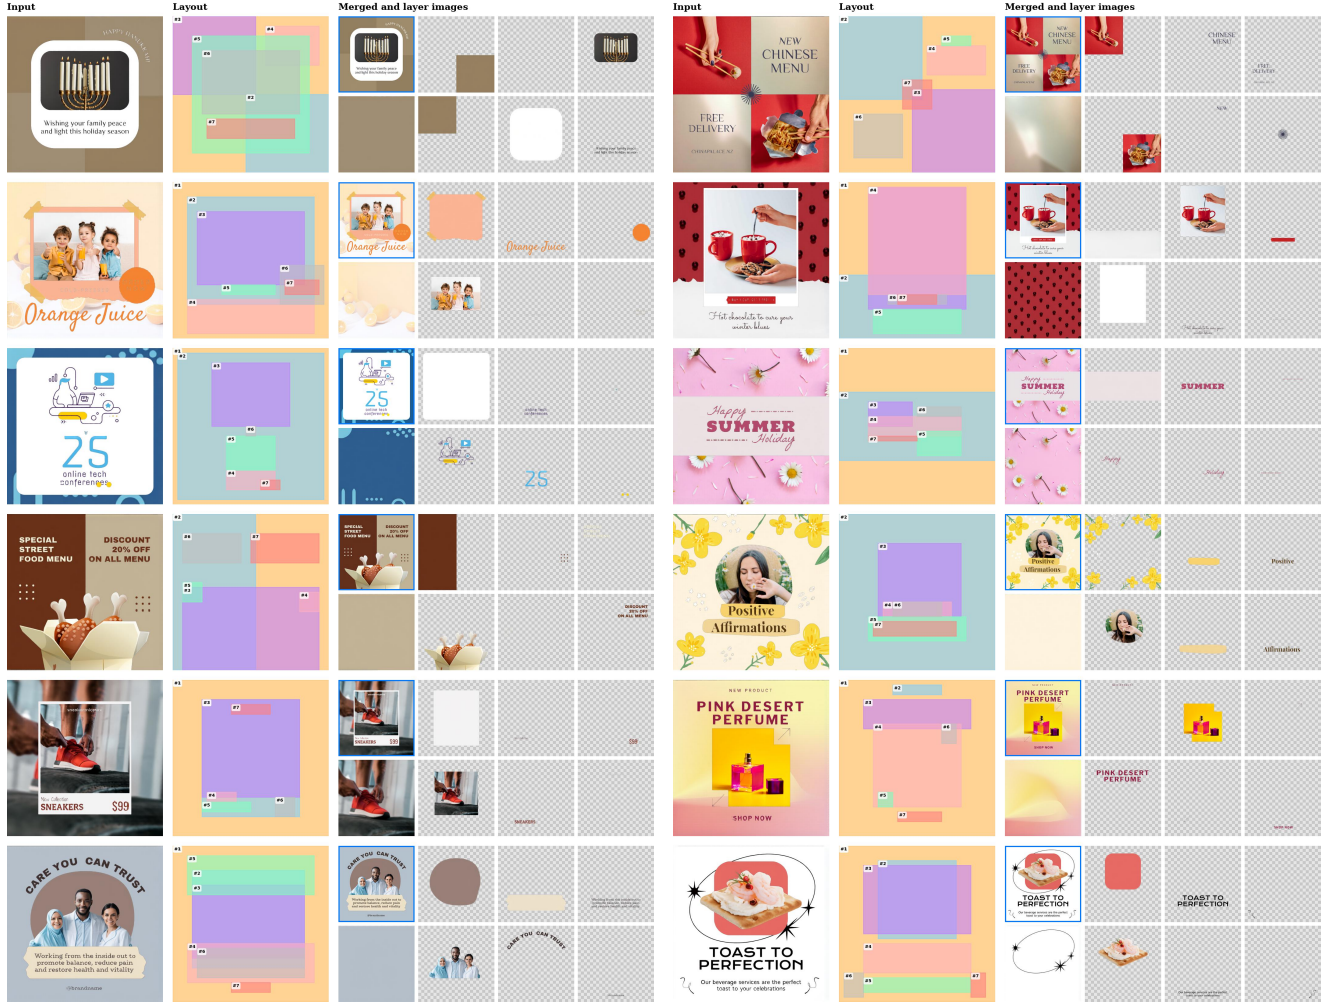

Figure 22. **Image-to-layers visualization with 8 layers.** Decomposition result showing increased layer complexity with 8 distinct transparent layers. Our method successfully handles more complex compositions, maintaining layer quality and proper decomposition granularity across the extended layer hierarchy. Each layer preserves semantic meaning and can be independently edited.

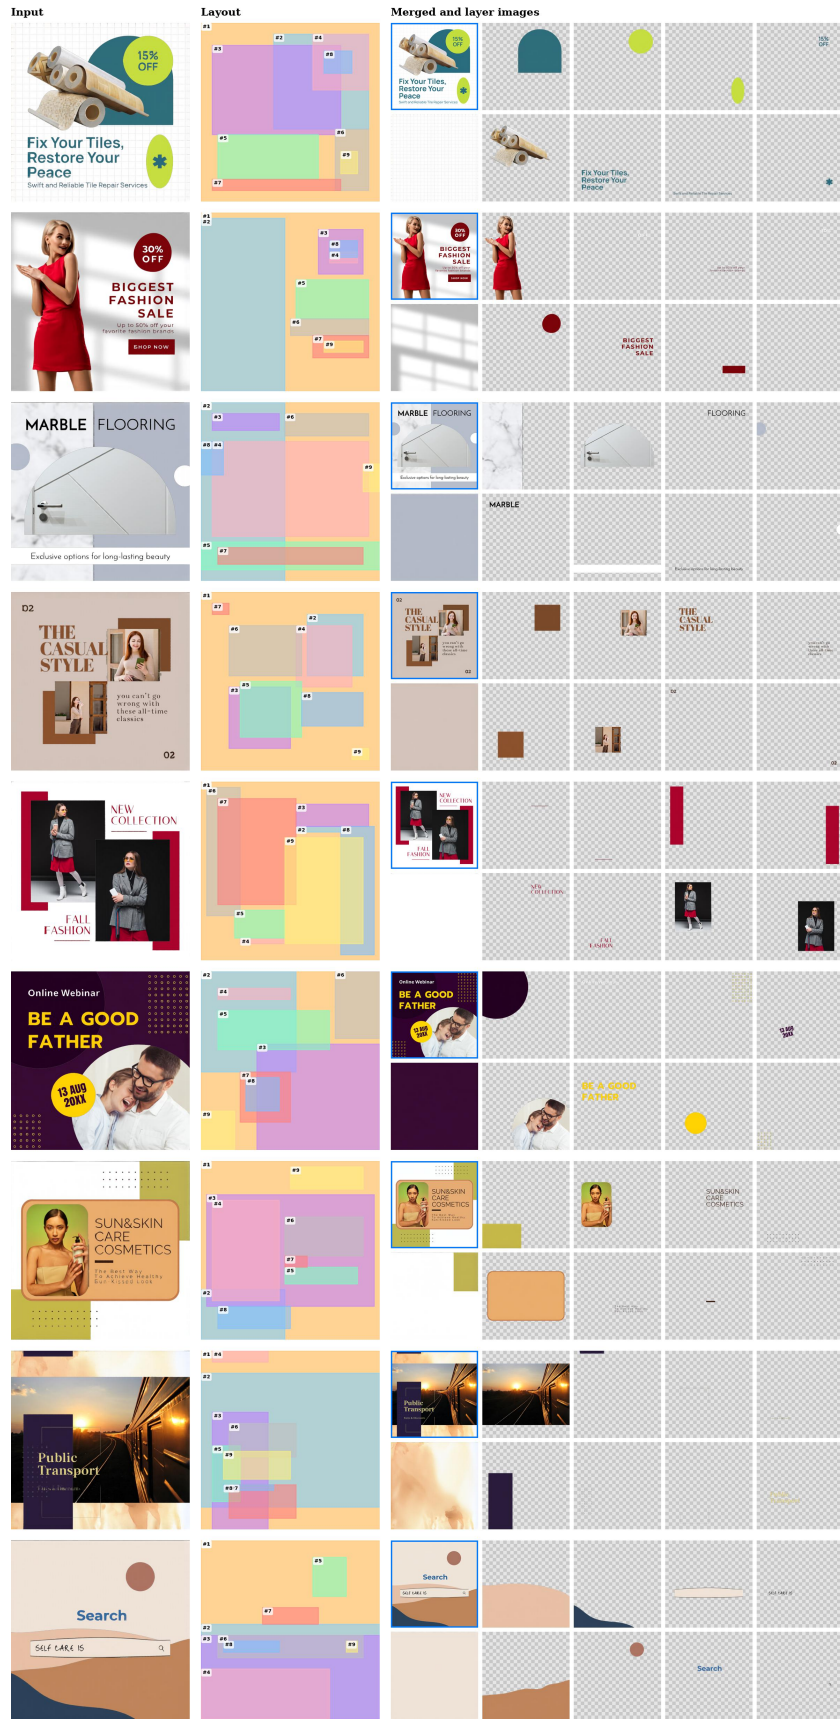

Figure 23. **Image-to-layers visualization with 10 layers.** Further demonstrating scalability to compositions with 10 transparent layers. Our masked region transformer maintains stable performance across different layer counts, producing coherent decompositions without architectural modifications. The visualization shows consistent layer quality from background to foreground elements.

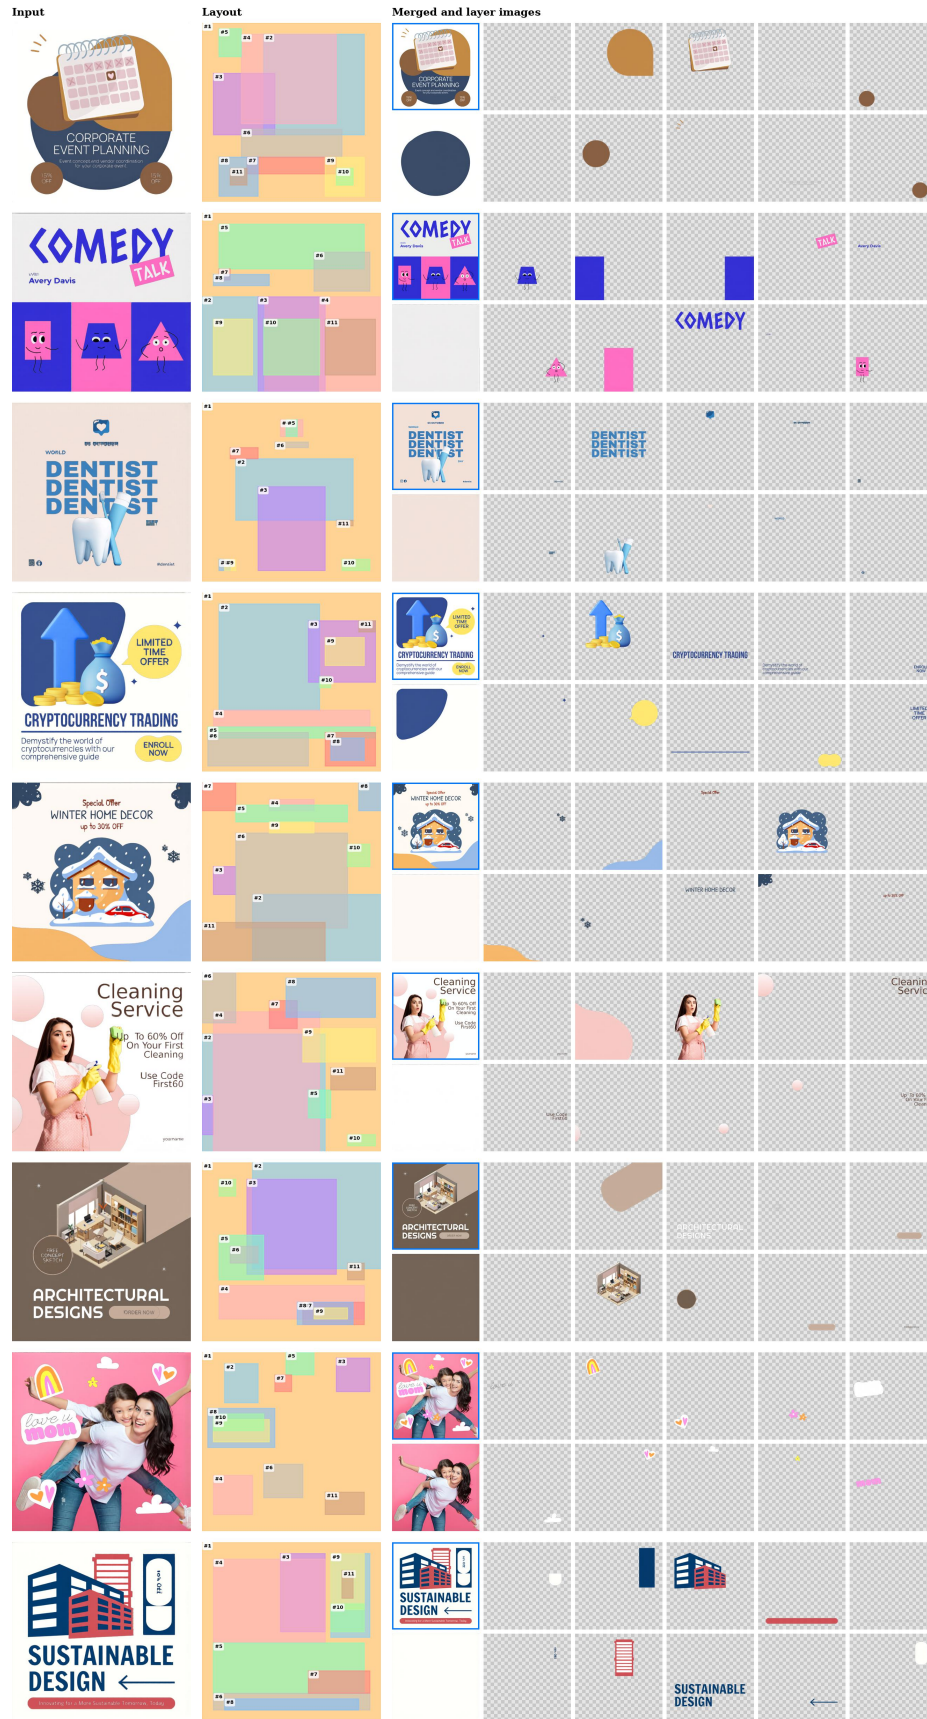

Figure 24. **Image-to-layers visualization with 12 layers.** Decomposition of a complex design into 12 transparent layers, demonstrating our method’s capability to handle high layer counts while maintaining decomposition quality. Each layer retains sharp boundaries and proper alpha masks, essential for professional editing workflows.

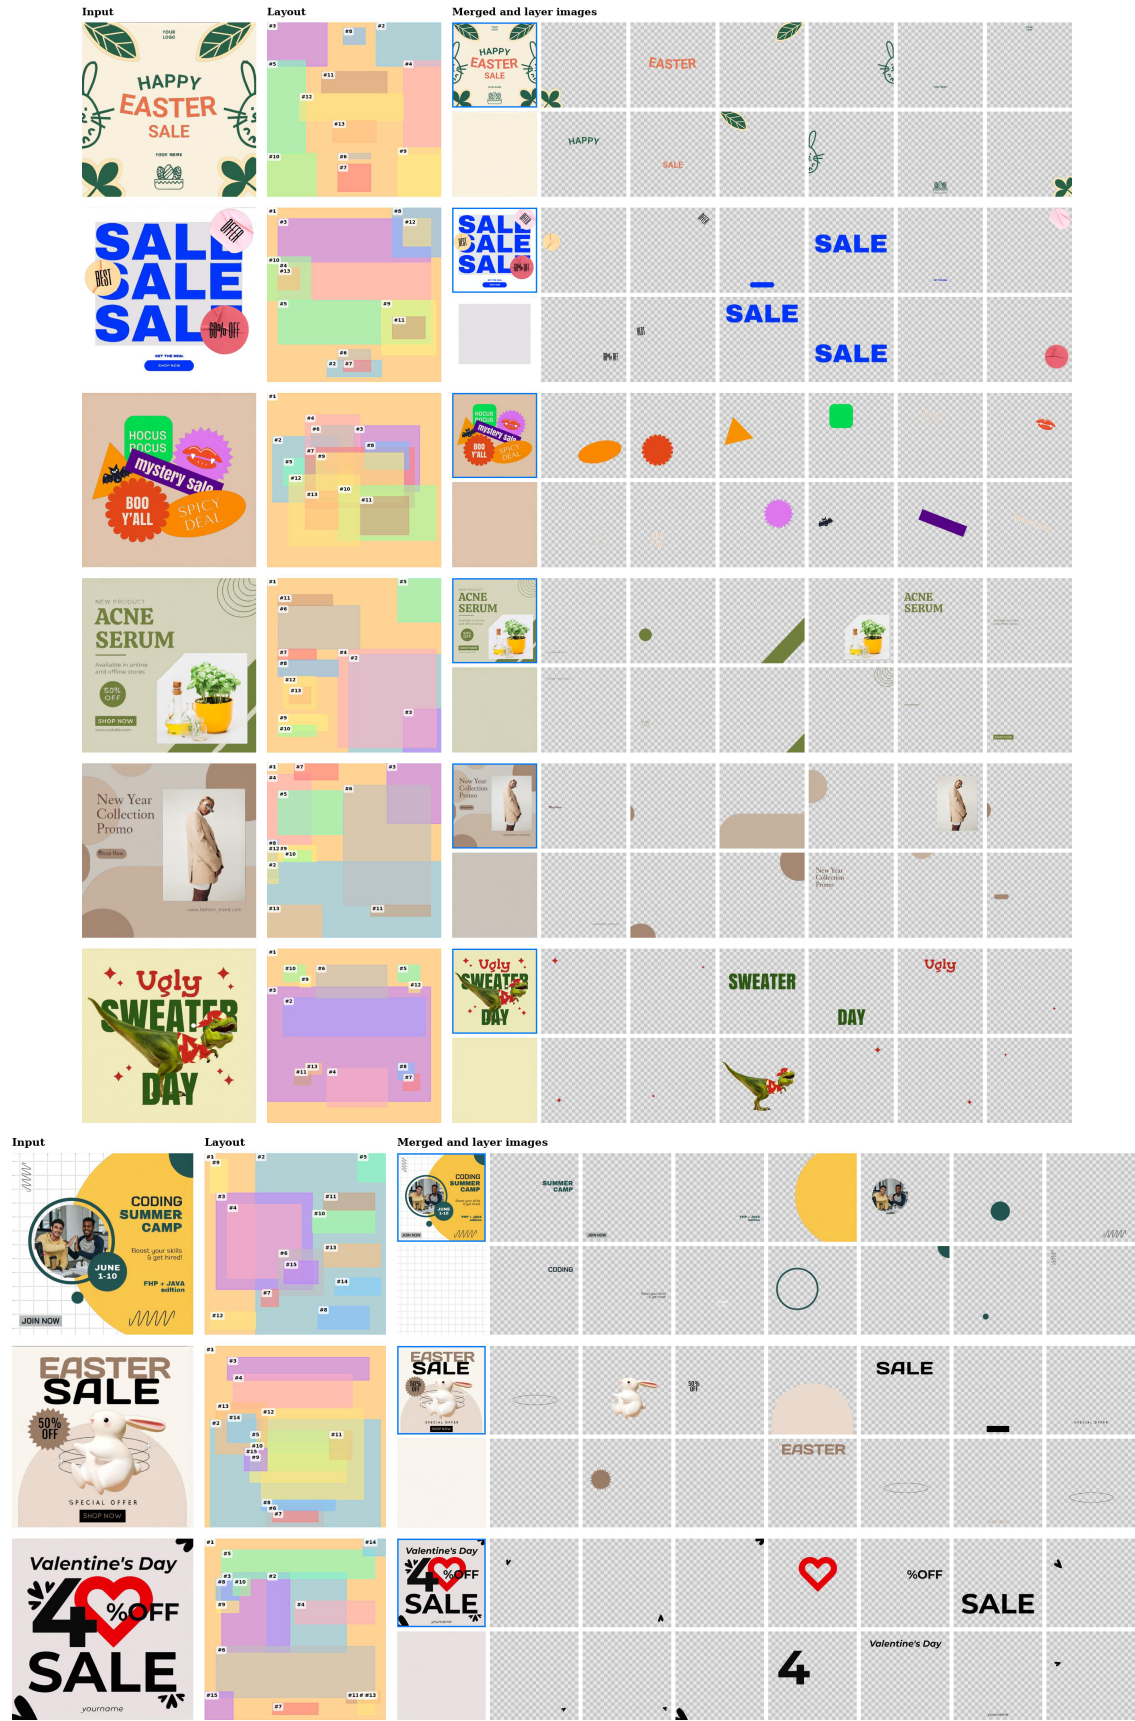

Figure 25. **Image-to-layers visualization with 14 and 16 layers.** Two examples showcasing our method’s scalability to very high layer counts (14 and 16 layers respectively). As shown in Table 3, our approach maintains stable performance across a wide range of layer numbers from 2 to 50 layers, demonstrating flexibility in handling both simple and complex multi-element compositions.

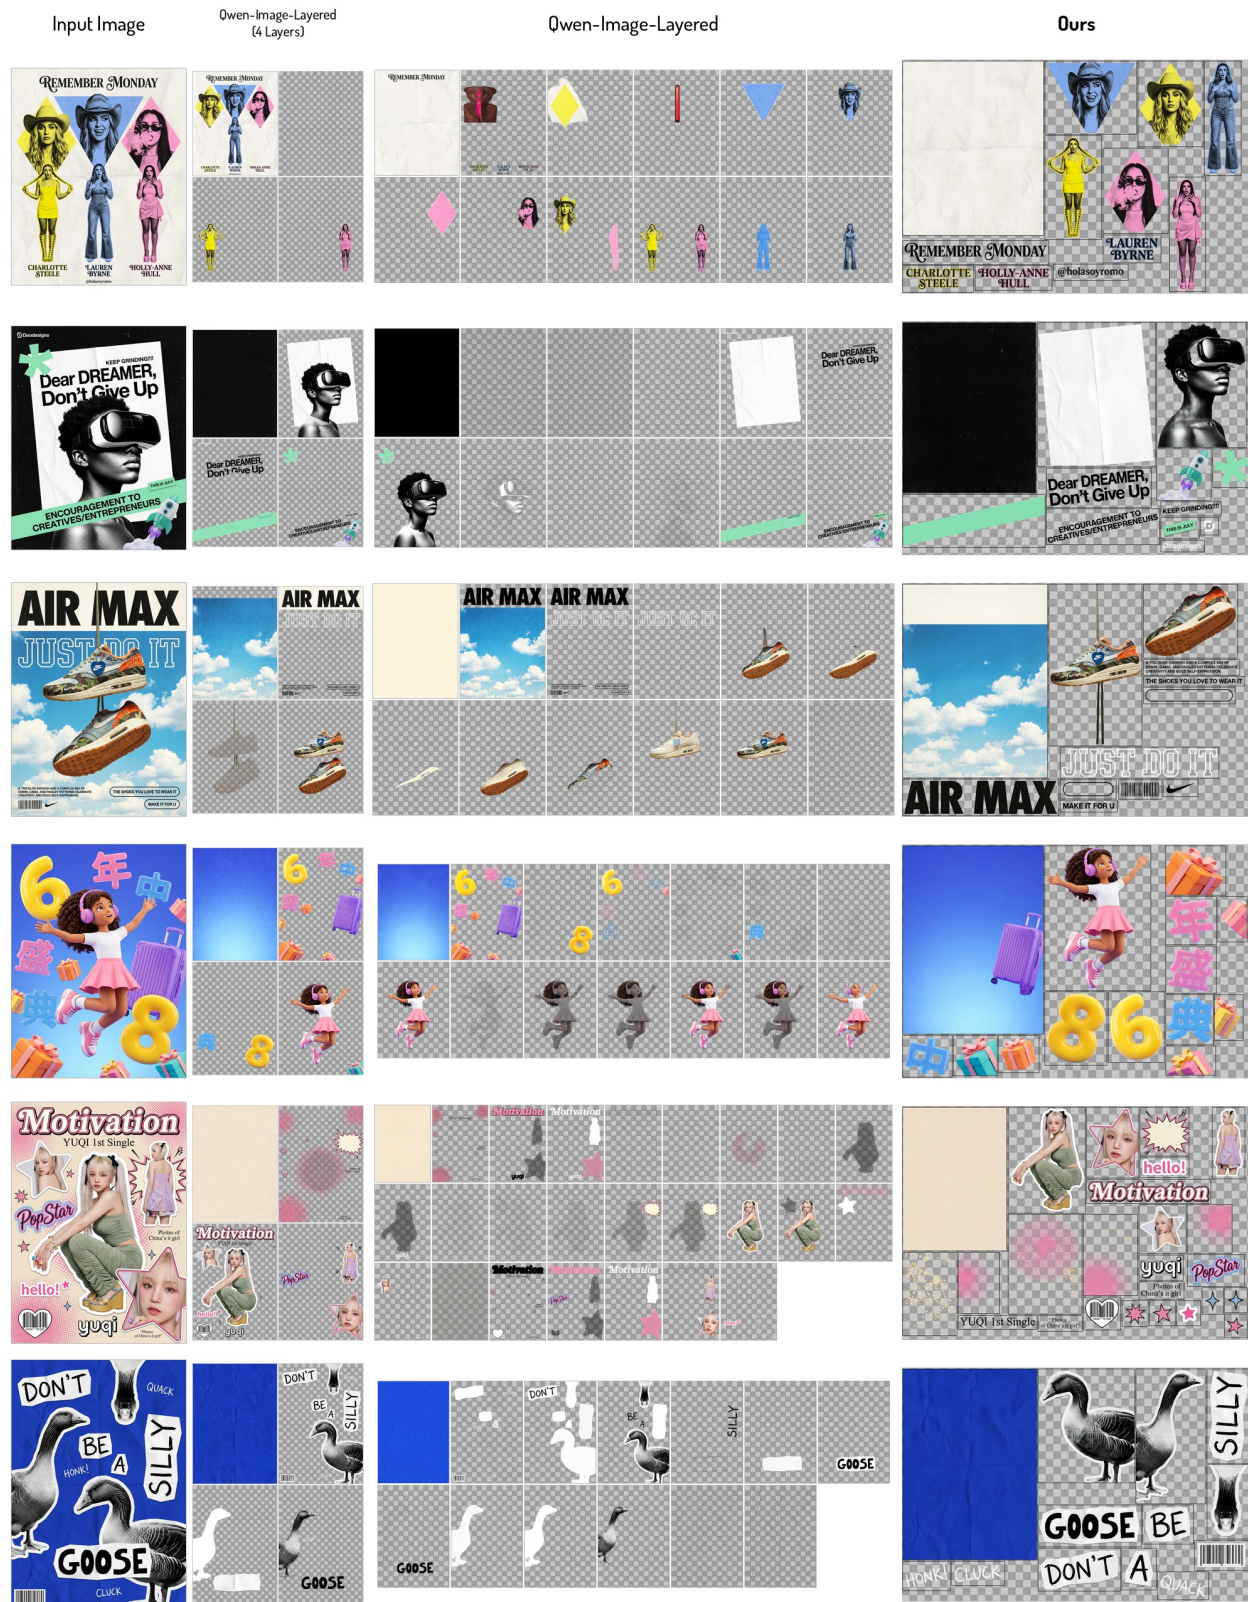

Figure 26. Image-to-layers comparison with Qwen-Image-Layered

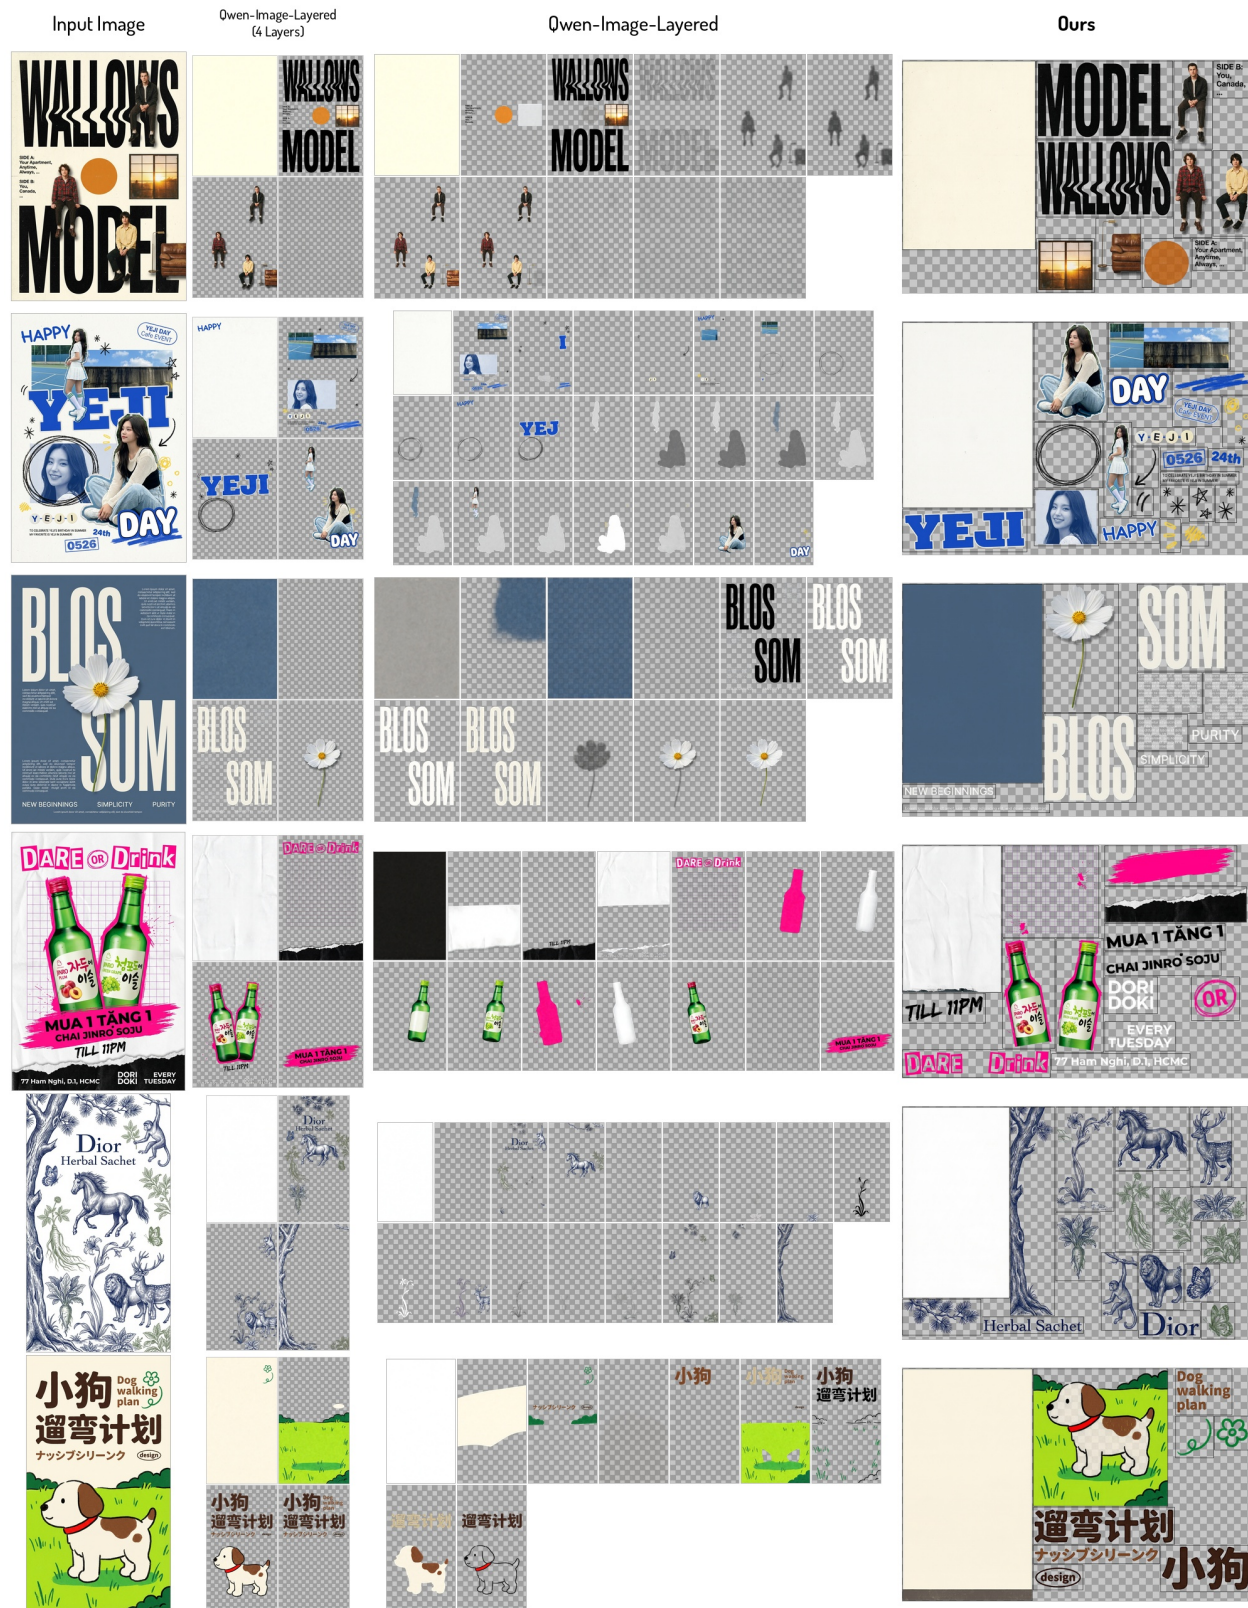

Figure 27. Image-to-layers comparison with Qwen-Image-Layered

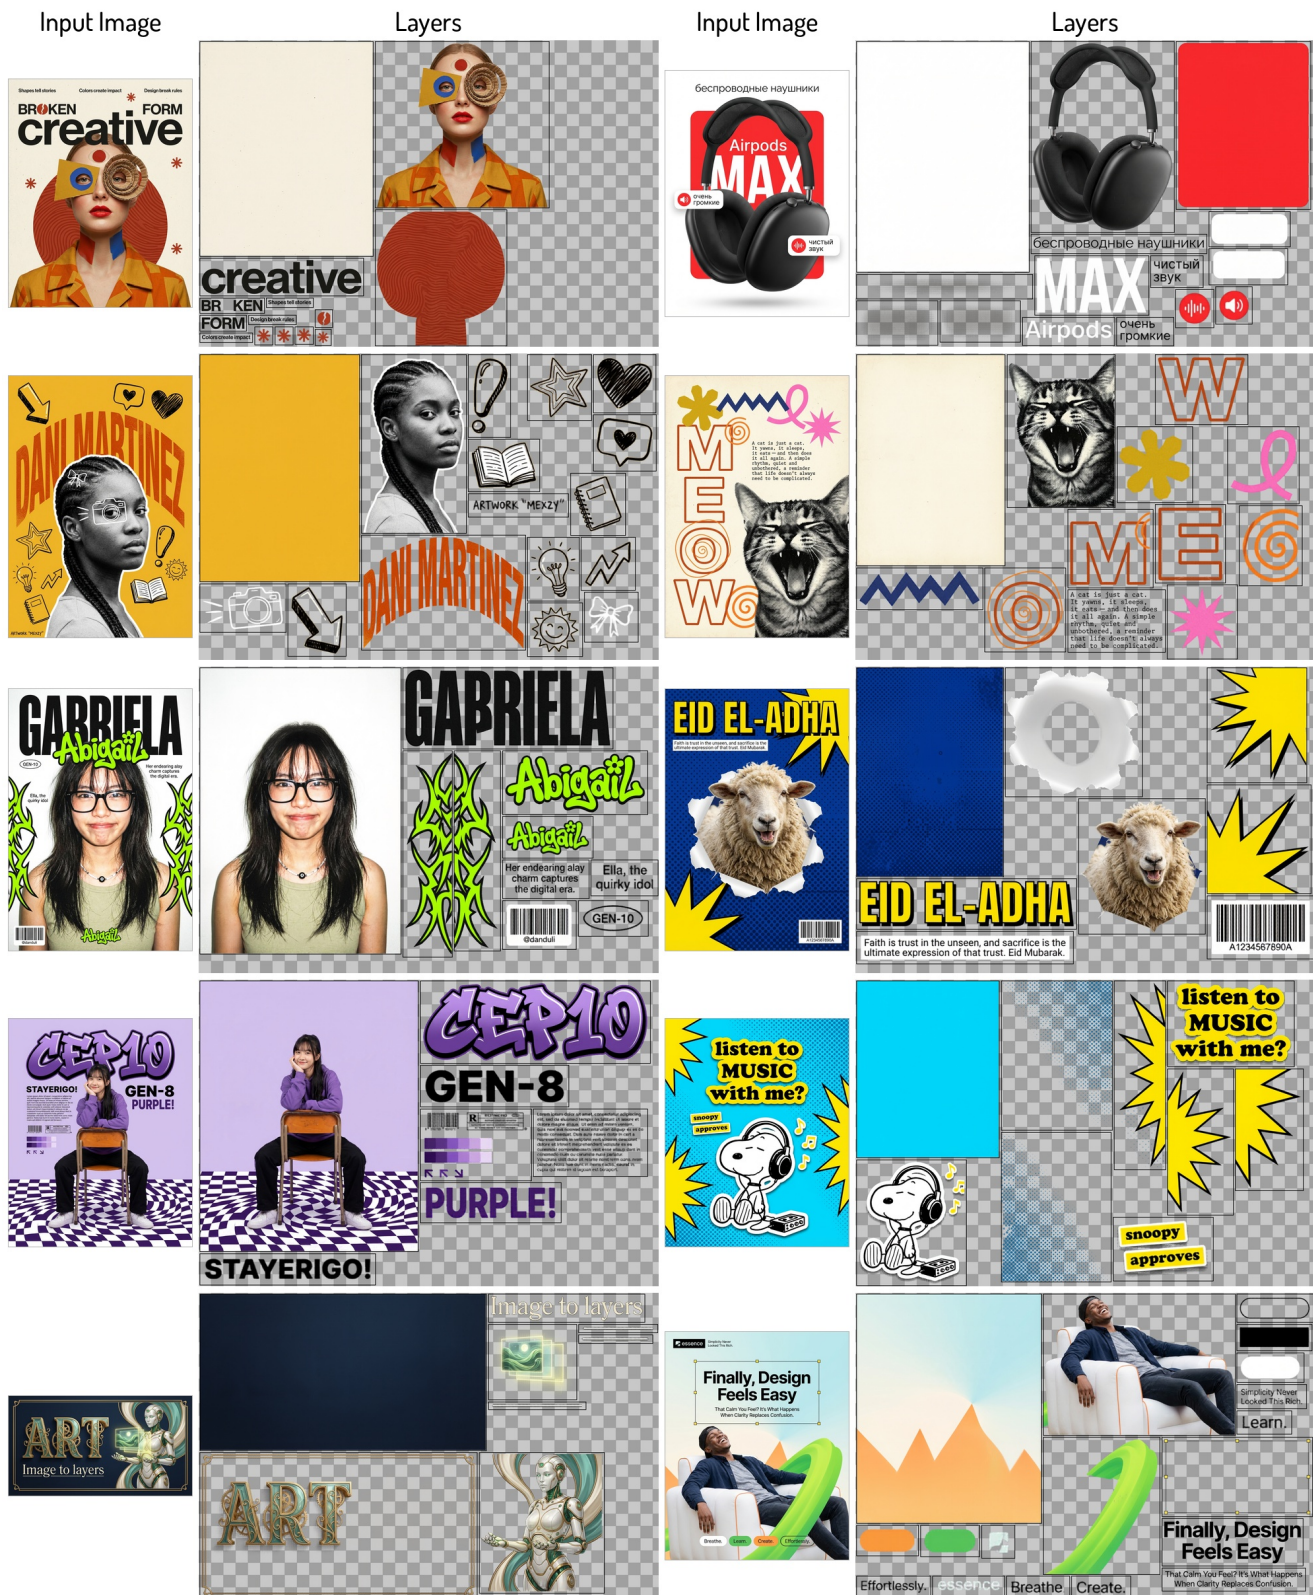

Figure 28. More image-to-layers results on AI-generated images.

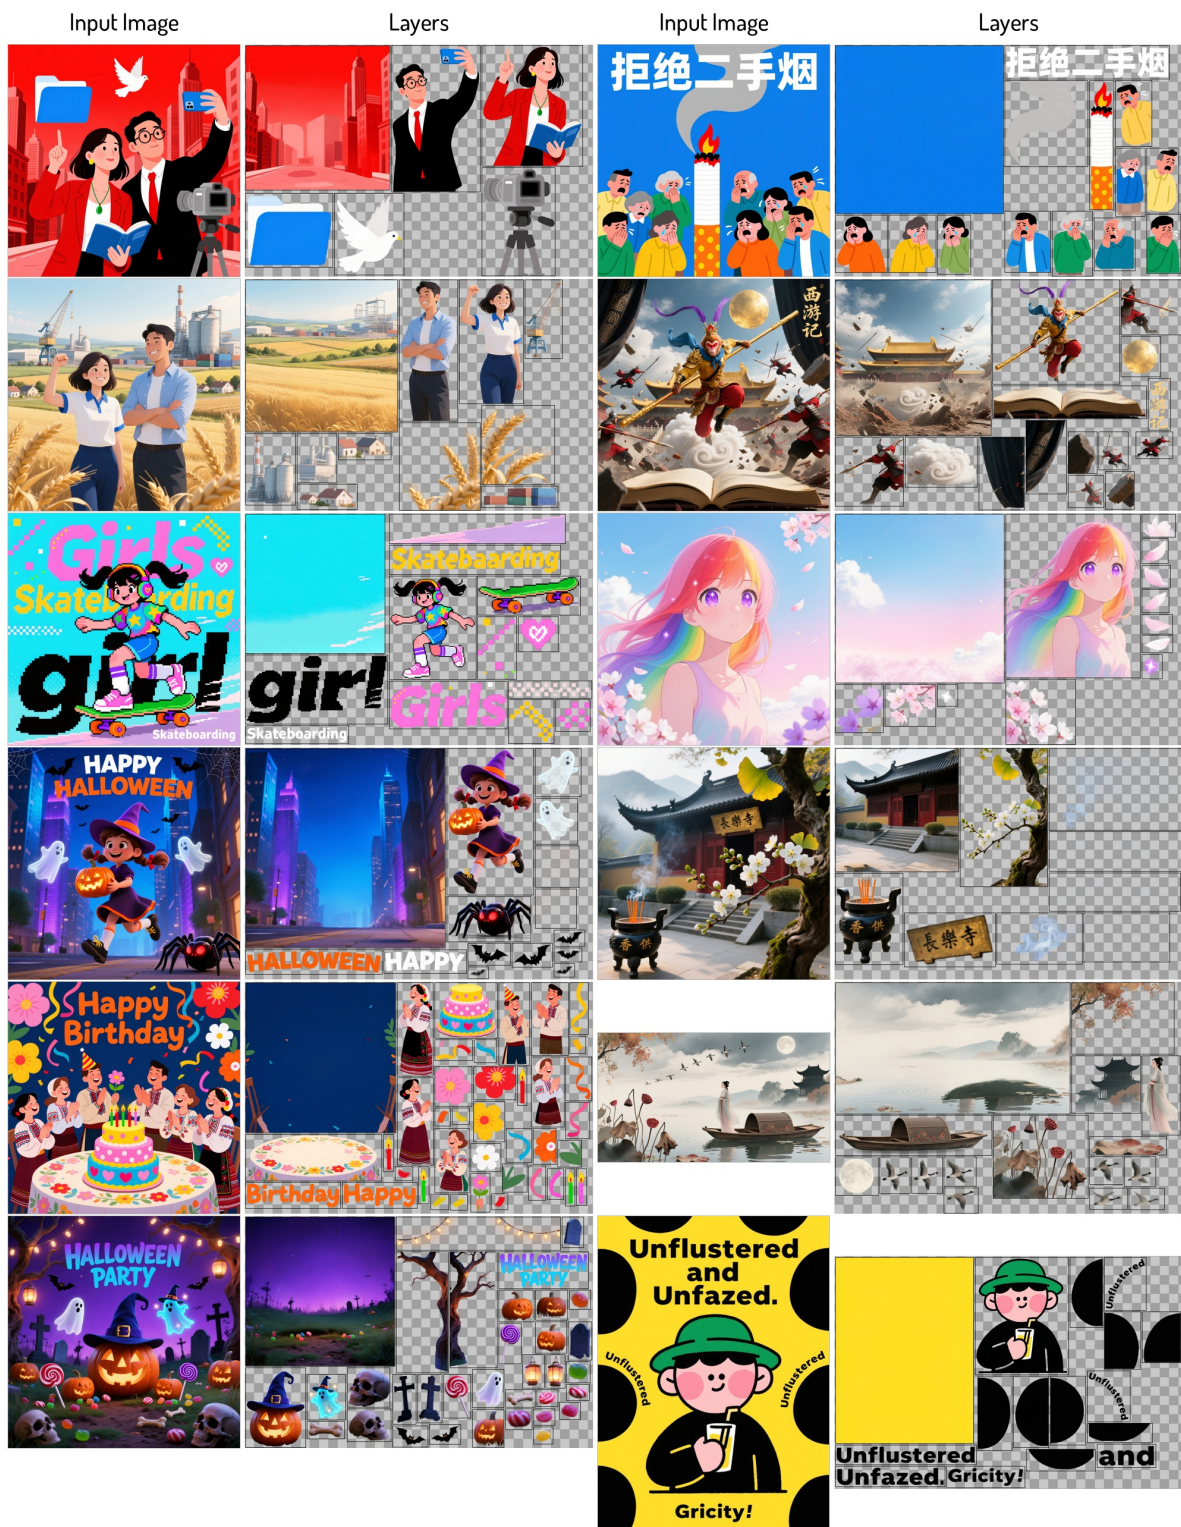

Figure 29. More image-to-layers results on AI-generated images.

| Layer Caption                                                                                                                                                                                                    | Existed Layer | Merged result | Added Layer | Added Layer |
|------------------------------------------------------------------------------------------------------------------------------------------------------------------------------------------------------------------|---------------|---------------|-------------|-------------|
| <p>&lt;layer&gt; "School". The text is styled in a playful, rounded font with a bold appearance. The color of the text is a bright, light green.</p> <p>&lt;/layer&gt; COLOR YOUR STUDIES! &lt;/layer&gt;</p>    |               |               |             |             |
| <p>&lt;layer&gt; Light pink footed baby pants with elastic waistband. &lt;/layer&gt;</p> <p>&lt;/layer&gt; Creamy white abstract flower or cloud shape with five rounded lobes. &lt;/layer&gt;</p>               |               |               |             |             |
| <p>&lt;layer&gt; "School". The text is styled in a playful, rounded font with a bold appearance. The color of the text is a bright, light green.</p> <p>&lt;/layer&gt; COLOR YOUR STUDIES! &lt;/layer&gt;</p>    |               |               |             |             |
| <p>&lt;layer&gt; Vibrant floral arrangement of pink, white, and red flowers with green leaves. &lt;/layer&gt;</p> <p>&lt;/layer&gt; Bright pink horizontal line with arrowheads at both ends. &lt;/layer&gt;</p> |               |               |             |             |
| <p>&lt;layer&gt; A pastel blue Easter egg decorated with stripes and white dots. &lt;/layer&gt;</p> <p>&lt;/layer&gt; Text: Happy. The text is styled in a light blue color &lt;/layer&gt;</p>                   |               |               |             |             |

Figure 30. **Additional examples for layer addition task.** We demonstrate the layers-to-layers capability by adding new layers to existing compositions based on text prompts. Our method generates new layers that maintain cross-layer consistency and harmonize with the existing design’s spatial layout and visual style. By generating multiple layers in a single pass and conditioning on all existing layers, our approach better captures inter-layer relationships and produces coherent insertions that preserve global composition.

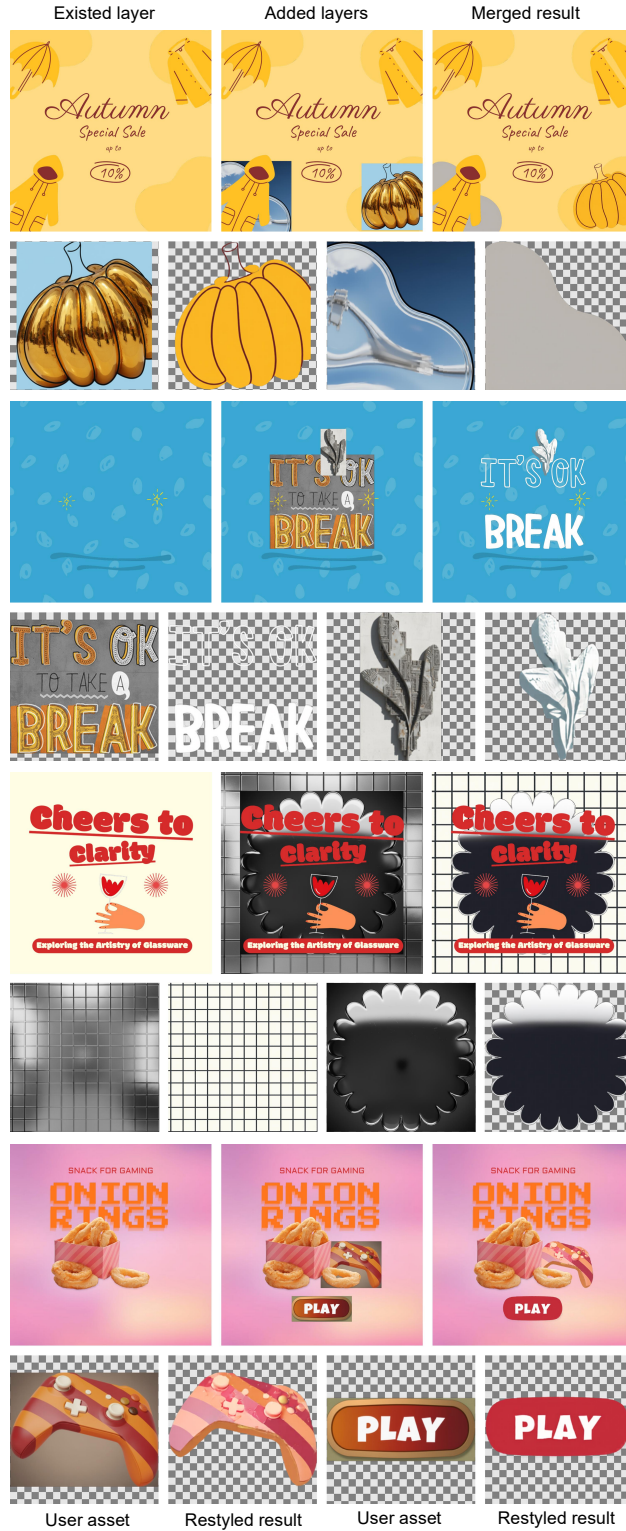

Figure 31. **Additional examples for layer restylization task.** We visualize the transformation of user-provided assets into stylistically harmonized layers that match the overall composition. Our method performs this restylization in a single pass for all target layers, preserving geometric structure while adapting appearance to align with the existing design’s visual identity. The results demonstrate effective style transfer while maintaining layer coherence and compositional harmony.

## Prompt:

The image presents a serene and romantic seaside setting, characterized by a soft pastel color scheme dominated by warm pink tones. The background features a gradient that transitions from a light peach at the top to a deeper coral hue near the bottom, evoking a tranquil sunset atmosphere. This gentle color palette is complemented by the natural textures of the beach and the ocean, which are visible through an arched cutout that frames the central scene. In the foreground, two individuals are seated at a table adorned with a simple yet elegant dining setup. They are positioned against the backdrop of a stunning beach view, where the sun is setting over the horizon, casting a warm glow on the water. The table is set with a few plates and drinks, suggesting an intimate dinner experience. The lush palm leaves arching overhead add a tropical feel, enhancing the romantic ambiance of the scene. The text elements are strategically placed on the left side of the image. The main title, "SEASIDE PLACES," is presented in a bold, modern font, while the subtitle, "WITH A SPECIAL GIFT FOR A ROMANTIC DINNER," is in a slightly smaller size, emphasizing the theme of romance and special occasions. The text is rendered in a rich brown color, which contrasts nicely against the soft background, ensuring readability. The overall artistic style of the image leans towards a contemporary digital illustration, with clean lines and a polished finish. The use of soft edges and blending effects creates a harmonious and inviting atmosphere. The theme of the image is clearly romantic and celebratory, making it suitable for contexts such as advertisements for dining experiences, travel promotions, or special occasion planning. The mood conveyed is one of intimacy and warmth, ideal for couples looking to create memorable moments together. The inclusion of a gift box graphic in the lower corner further reinforces the idea of a special occasion, suggesting that this seaside dining experience could be part of a larger celebration, such as an anniversary or a proposal. Overall, this image effectively captures the essence of a romantic seaside dinner, making it a compelling visual for marketing or promotional materials aimed at couples seeking unique dining experiences.

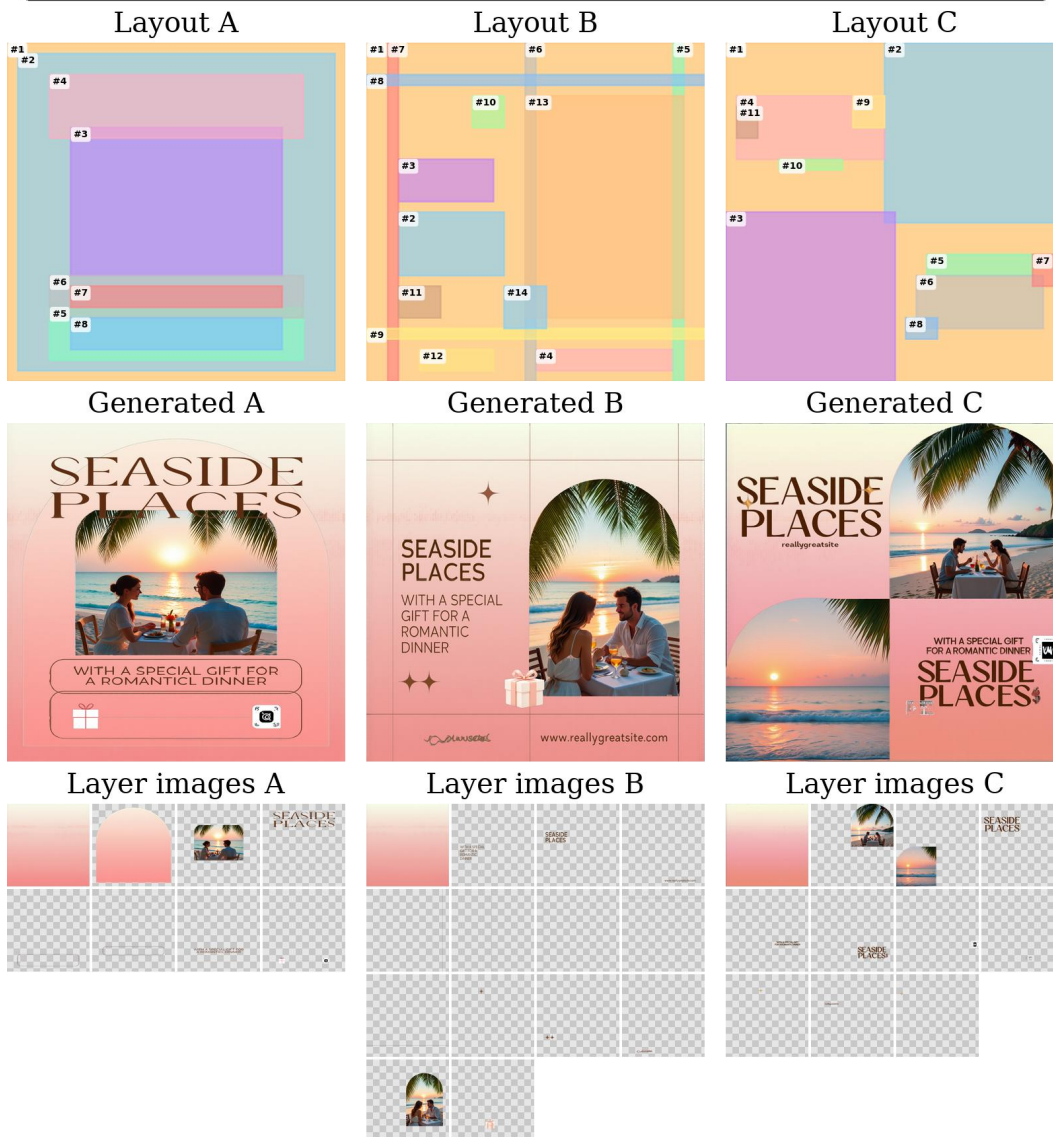

Figure 32. **Text-to-layers: Merged image vs. layout visualization.** Additional example demonstrating our model’s ability to generate well-composed multi-layer designs from text prompts. The side-by-side comparison shows how textual descriptions are translated into visual compositions (left) with structured layer hierarchies (right), highlighting the model’s capability to learn both aesthetic and structural design principles.

## Prompt:

The image presents a visually engaging promotional layout designed to highlight hiking adventures in Virginia. The background features a lush, green tropical setting, suggesting a vibrant and natural environment that invites exploration. The foliage is rich and varied, with large leaves and dense greenery that create a sense of adventure and connection to nature. In the upper left quadrant, the text "EXPLORE VIRGINIA'S HIKING TRAILS" is prominently displayed in an elegant serif font, colored in a soft olive green. This text is accompanied by decorative star motifs, adding a whimsical touch that enhances the adventurous theme. Below this, a horizontal line in a lighter shade complements the text, providing a clean and organized appearance. The upper right quadrant showcases an individual wearing a wide-brimmed hat, with a parrot perched on their shoulder. This element adds a playful and exotic feel to the image, emphasizing the outdoor and wildlife aspects of hiking. The individual's attire is practical and earthy, consisting of a light brown shirt that blends harmoniously with the natural surroundings. In the lower left quadrant, another individual is depicted, engaged in the act of examining a map. This scene conveys a sense of teamwork and exploration, reinforcing the idea of adventure in the great outdoors. The person is dressed in a similar earthy palette, which maintains the cohesive aesthetic of the image. The lower right quadrant features the text "EXO TRAVEL" at the top, followed by "BOOKING ONLINE" in a larger, bold font. The text is again in olive green, ensuring consistency with the overall color scheme. The use of stars around the text adds a touch of charm and draws attention to the call to action, encouraging viewers to engage with the travel service. The artistic style of the image is modern and clean, with a focus on natural elements and a cohesive color palette that evokes feelings of adventure and exploration. The overall theme is one of outdoor adventure and travel, with a mood that is both inviting and motivational, encouraging viewers to embark on their own hiking journeys. This image could be effectively used in various contexts, such as social media promotions, travel brochures, or website banners, aimed at attracting nature enthusiasts and adventure seekers looking to explore Virginia's hiking trails.

Layout A

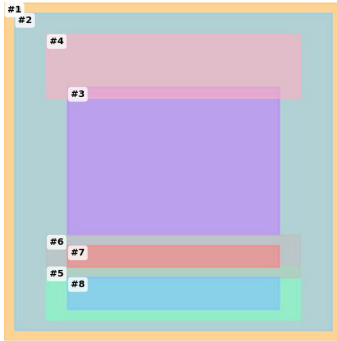

Generated A

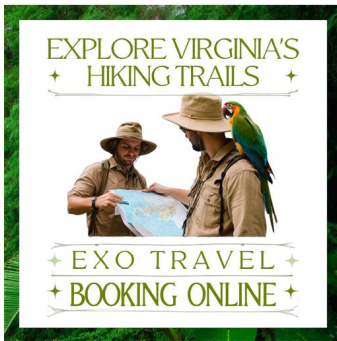

Layer images A

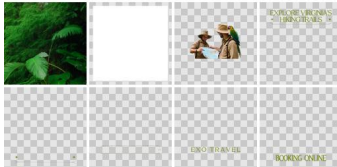

Layout B

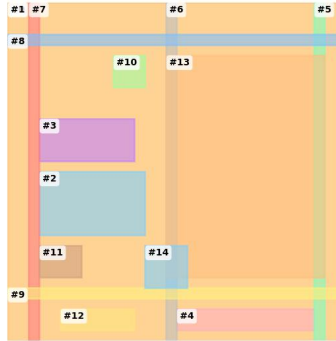

Generated B

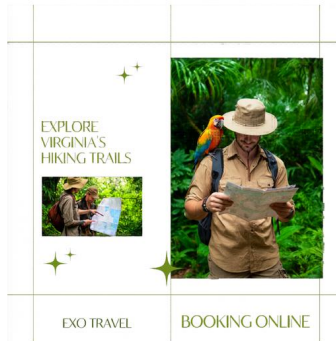

Layer images B

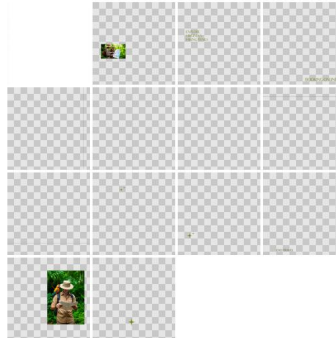

Layout C

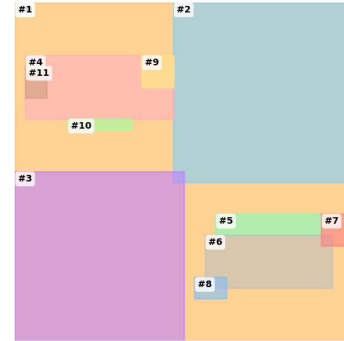

Generated C

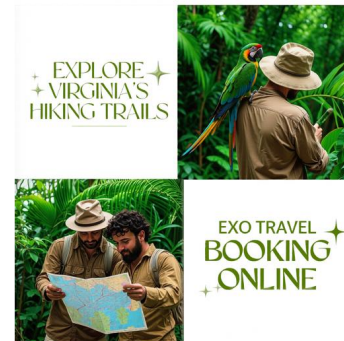

Layer images C

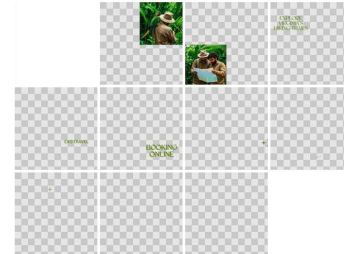

Figure 33. **Text-to-layers: Merged image vs. layout visualization.** Another example showing the relationship between the generated merged design and its underlying layer layout structure. The layout visualization reveals how our model organizes multiple layers with appropriate spatial relationships, z-ordering, and compositional balance to create aesthetically pleasing designs from text descriptions.

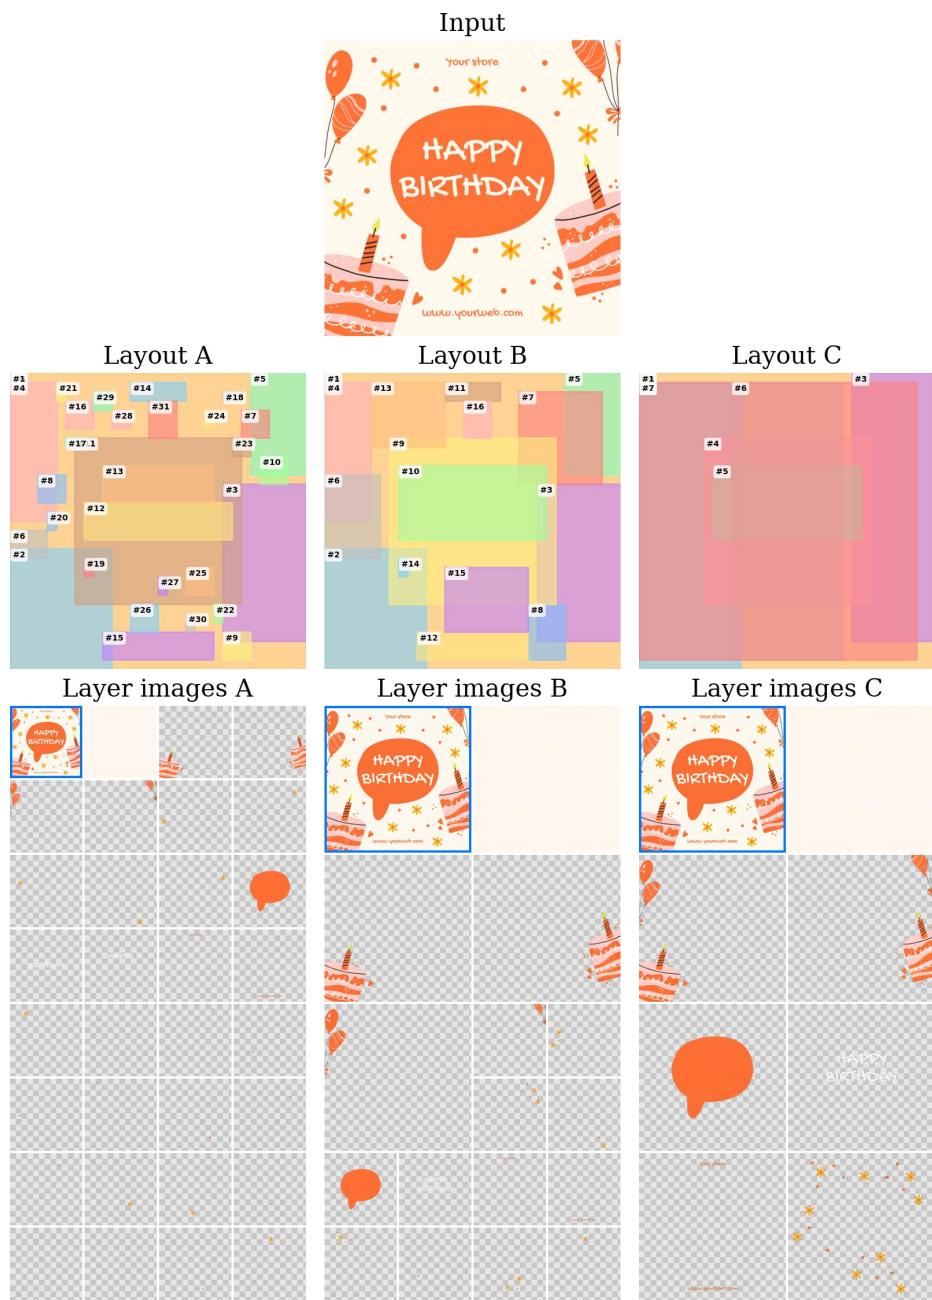

Figure 34. **Image-to-layers: Merged image vs. layout visualization.** We visualize the input image alongside the extracted layer layout structure for the image-to-layers decomposition task. This demonstrates how our method decomposes raster images into semantically meaningful layers with well-defined spatial boundaries. The layout representation shows bounding boxes and z-order that guide the decomposition process.

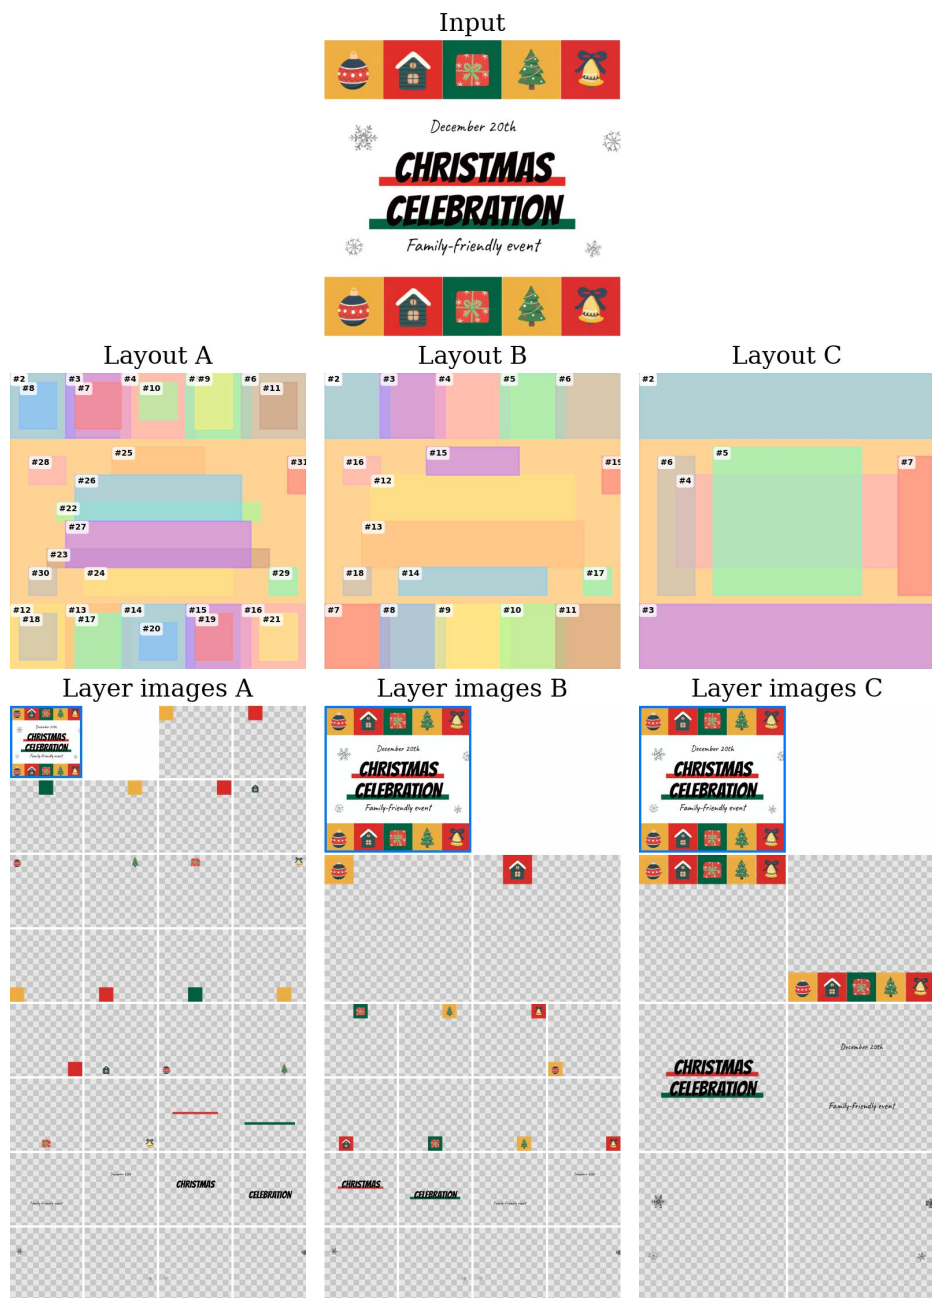

Figure 35. **Image-to-layers: Merged image vs. layout visualization.** Another example illustrating the correspondence between input raster images and their layer layouts. Our method leverages layout information (either from automatic detectors or manual annotations) to perform accurate layer decomposition. The layer grouping augmentation strategy helps improve robustness to noisy or ambiguous layout specifications.

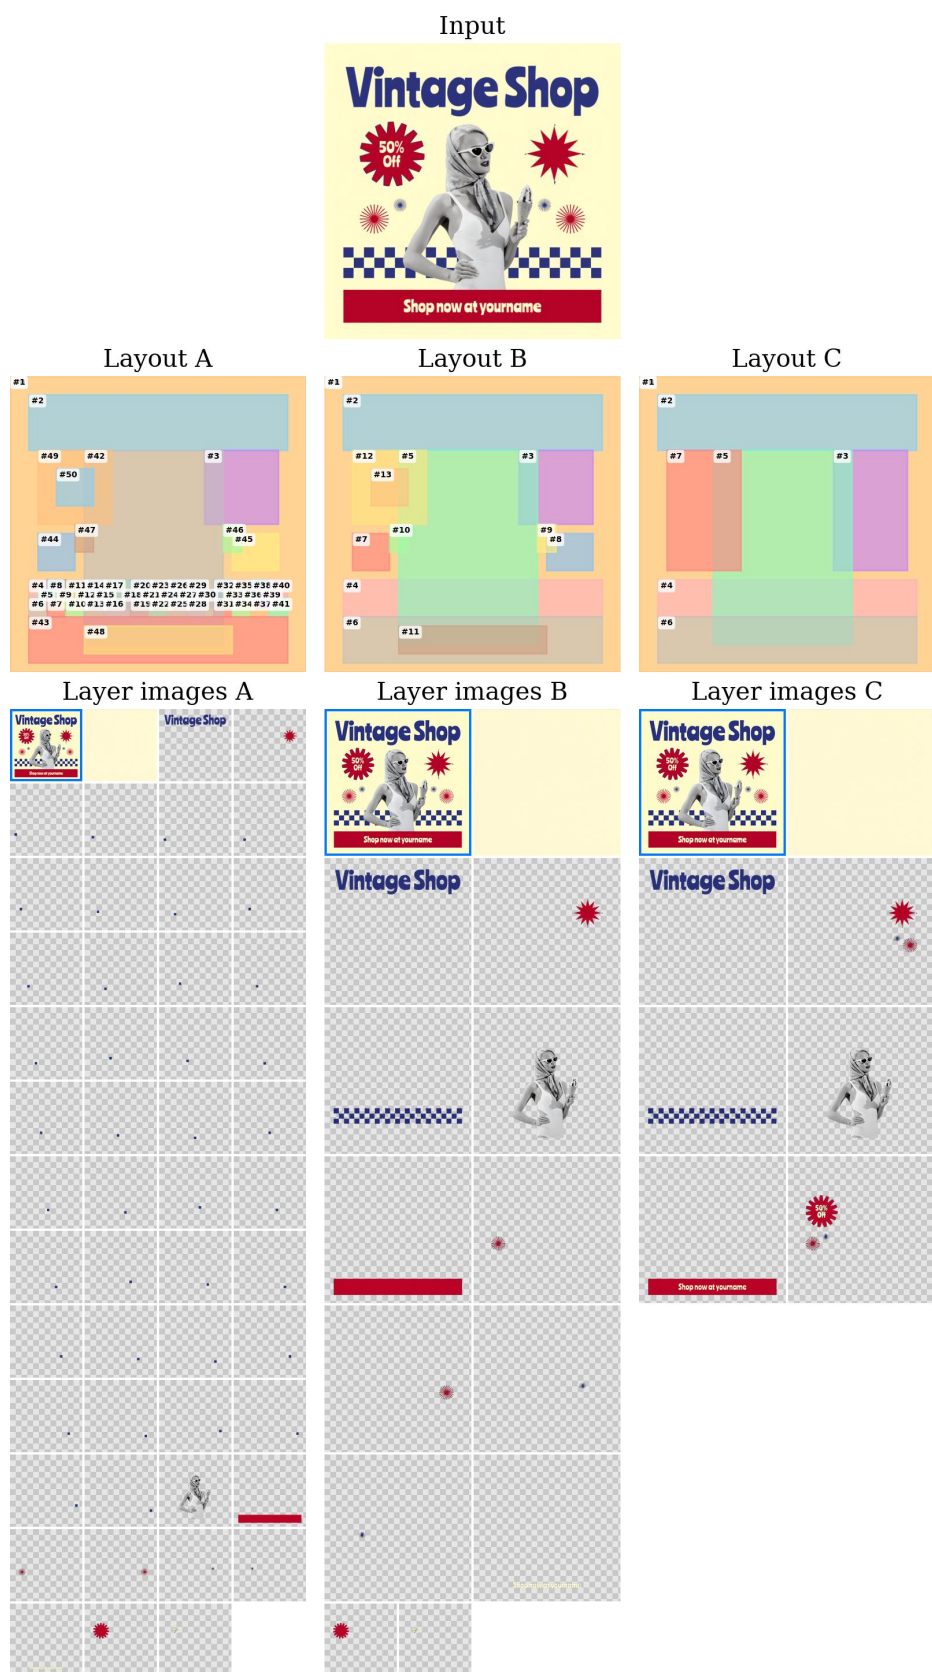

Figure 36. **Image-to-layers: Merged image vs. layout visualization.** Final example showing the input-layout relationship in image-to-layers decomposition. This visualization confirms our method’s ability to handle diverse design categories and layout complexities, producing high-quality transparent layers that can be independently edited while maintaining faithful reconstruction of the original composition.

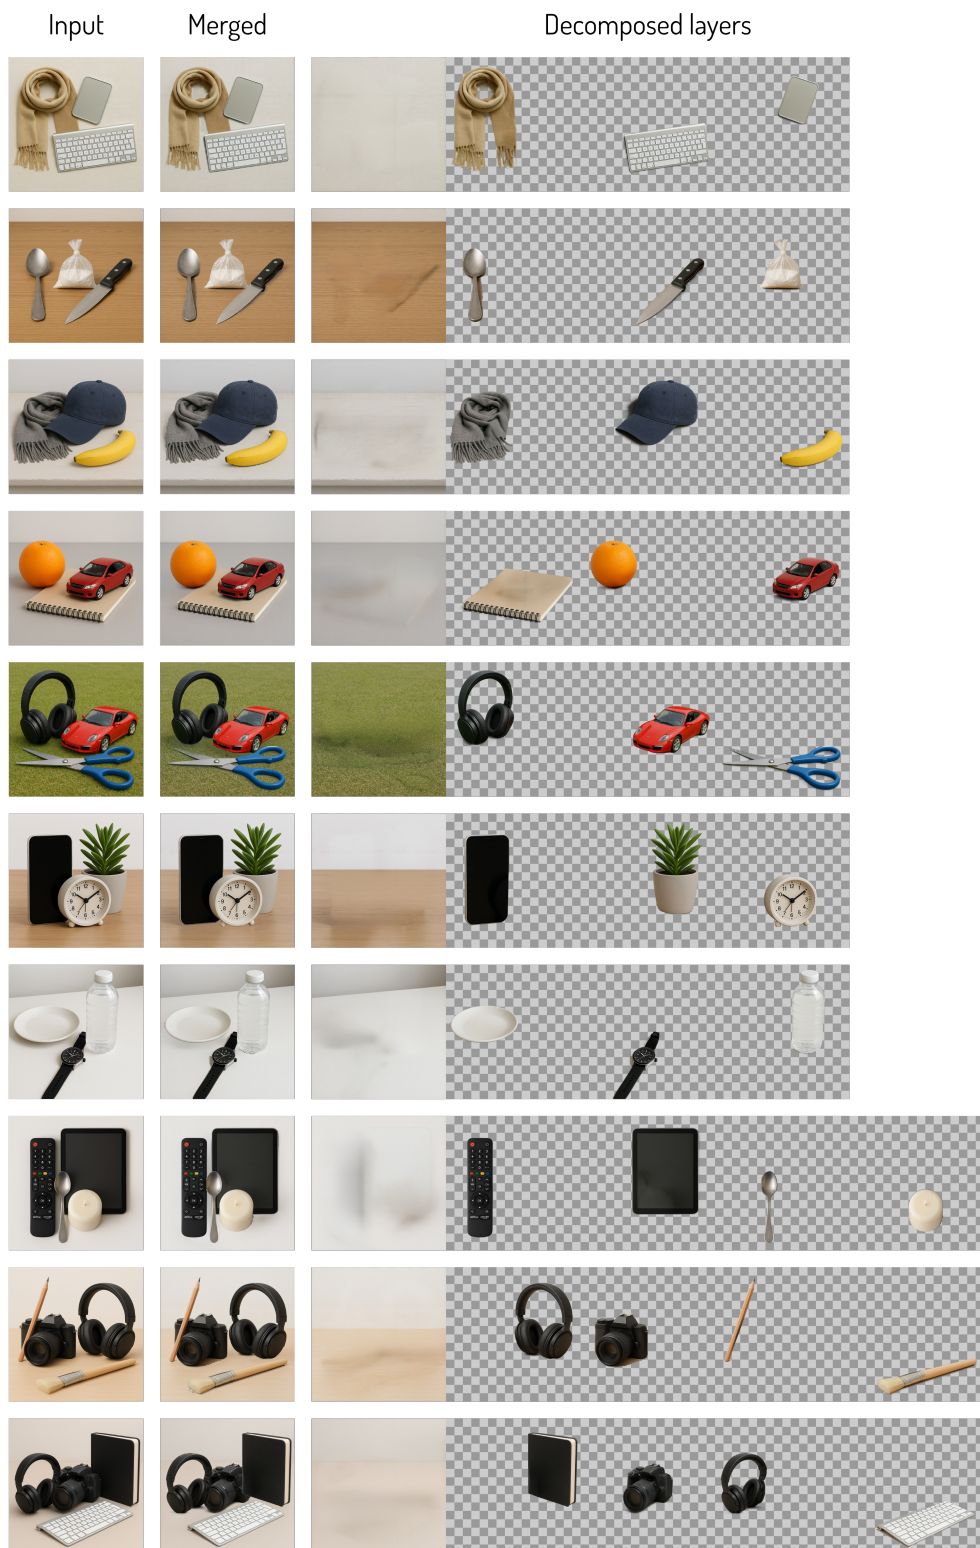

Figure 37. **Image-to-layers on real-world photographs: Limitation analysis.** We demonstrate our method’s generalization to out-of-domain natural images. Despite being trained exclusively on design datasets, our model can decompose real photographs into layers. However, as discussed in the Limitations section, the model faces challenges with physical effects like shadows—often excluding shadow regions from object layers and leaving them on the background. This limitation stems from the domain gap between planar designs and real-world scenes with lighting effects. Nevertheless, the strong visual understanding from the Qwen-Image backbone enables reasonable generalization, with most objects successfully separated.

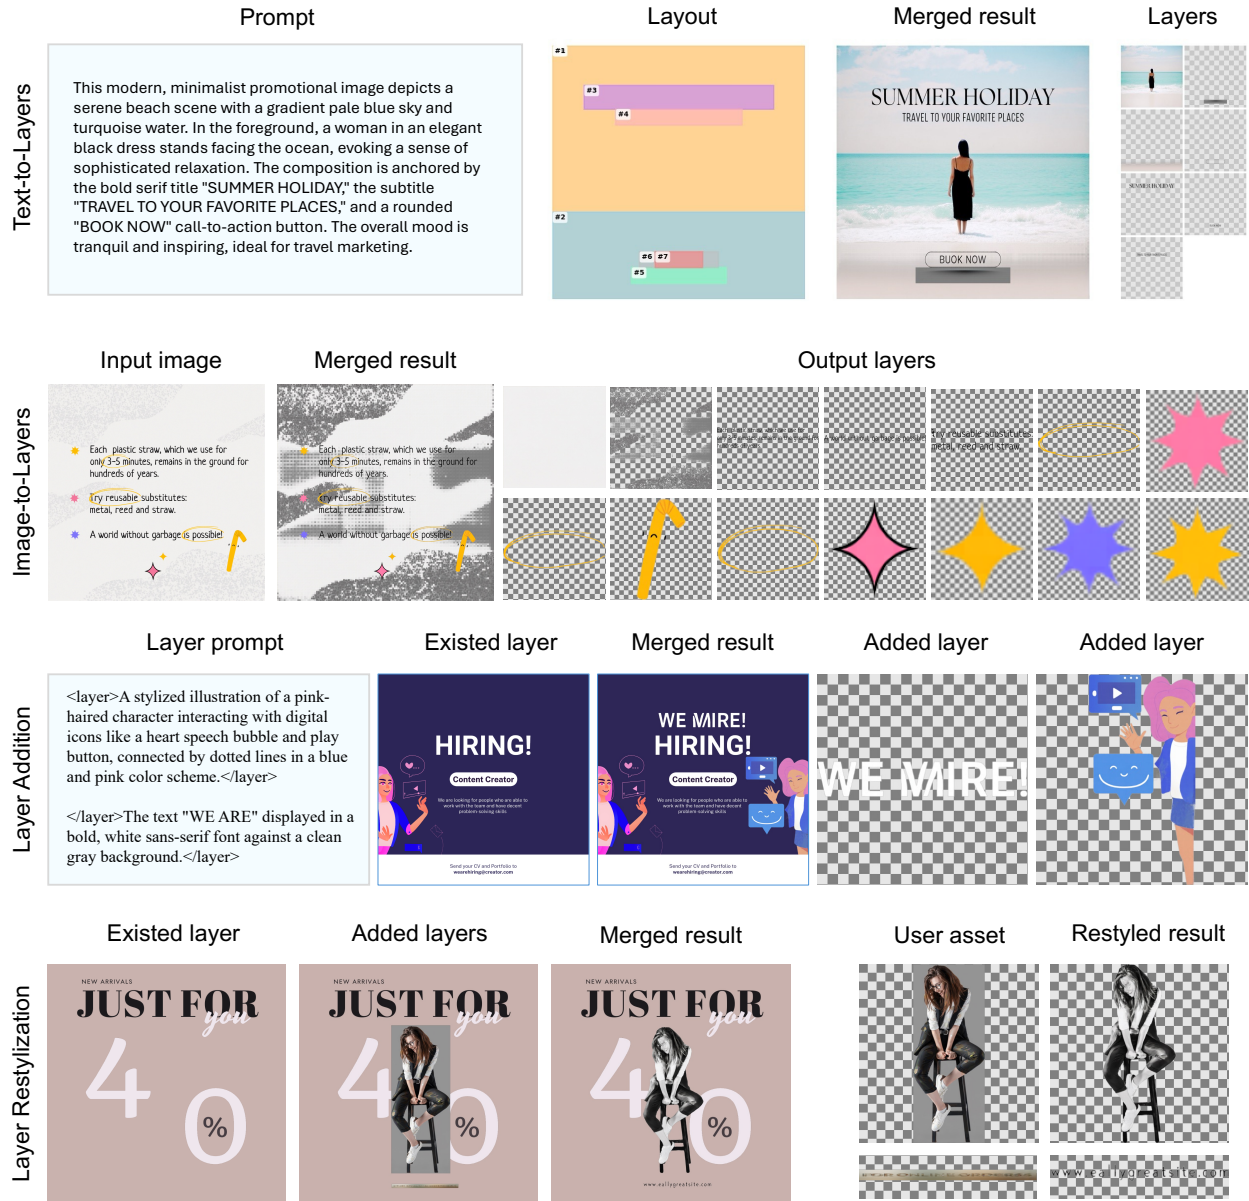

Figure 38. **Failure cases and limitations.** We present representative failure cases across our tasks. A common issue (top right) is the "gray background" artifact, where transparent areas are decoded as gray due to the ambiguity of 3-channel VAE encoding. Other limitations include (bottom left) malformed glyphs when generating very small text, and (bottom right) occasional failures in identity preservation and instruction following during layer-to-layer editing.

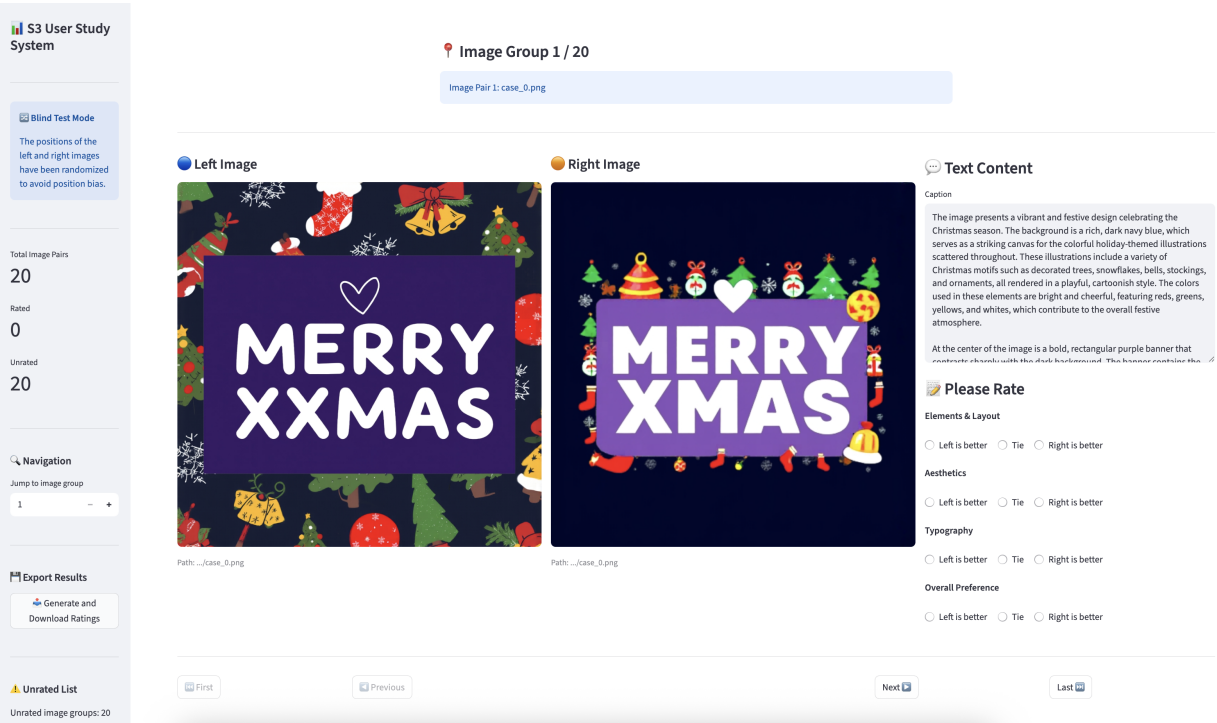

Figure 39. **User study interface for text-to-layers evaluation.** Two generated results are displayed side-by-side with the text caption shown on the right. Participants vote across four dimensions: elements (layout), aesthetics, typography, and overall preference.

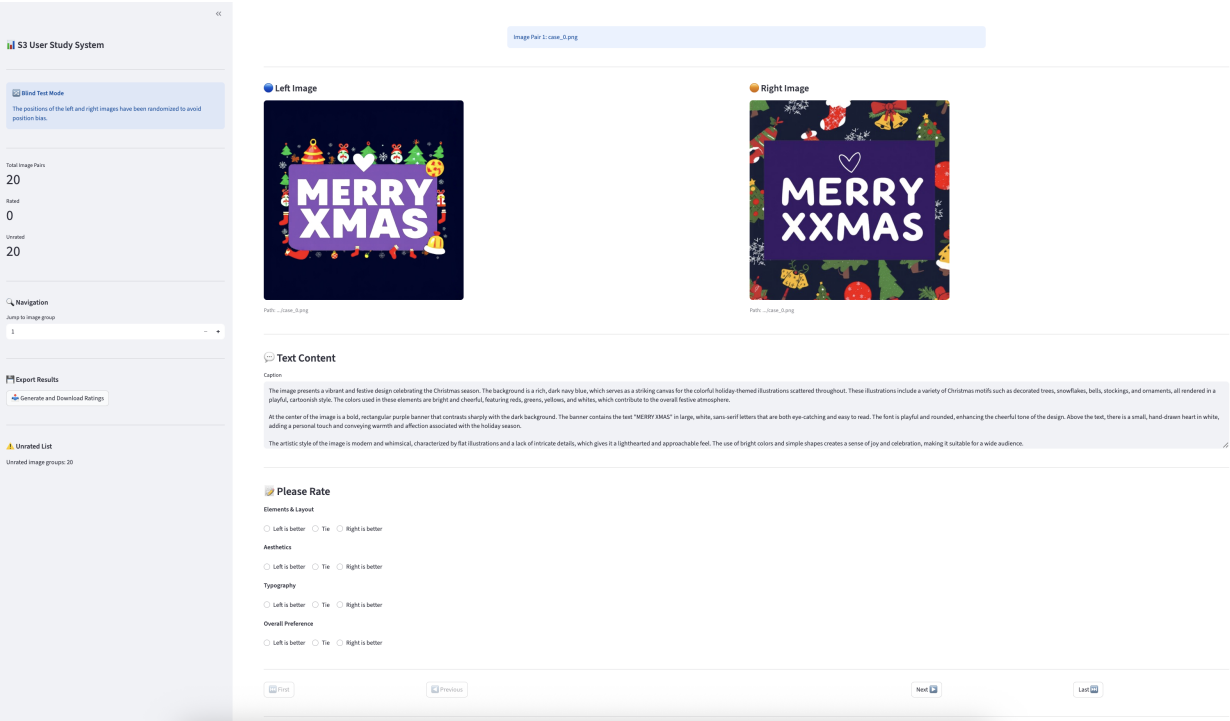

Figure 40. **User study interface for image-to-layers evaluation.** The reference input image is displayed at the center with decomposition results from two methods shown on both sides. Participants evaluate based on three metrics: granularity, layer integrity, and layer quality.
